# Supplementary material for: Phosphonate terminated PPH dendrimers: influence of pendant alkyl chains on the in vitro anti-HIV-1 properties
Source: Royal Society of Chemistry journal article supplement (doi:10.1039/b908352a), 2009-01-01

## Electronic Supplementary Material

### Phosphonate terminated PPH dendrimers: influence of pendant alkyl chains on the in vitro anti-HIV1 properties.

Alexandra Pérez-Anes,<sup>a,b,c</sup> Grégory Spataro,<sup>a,b</sup> Yannick Coppel,<sup>a,b</sup> Muriel Blanzat,<sup>c,\*</sup> Cédric-Olivier Turrin,<sup>a,b,\*</sup> Christine Moog,<sup>d</sup> Anne-Marie Caminade,<sup>a,b</sup> Isabelle Rico-Lattes,<sup>c</sup> Jean-Pierre Majoral.<sup>a,b</sup>

<sup>a</sup> Laboratoire de Chimie de Coordination du CNRS, UPR 8241, 205 route de Narbonne, F-31077 Toulouse, France. Fax: +33(0)561 553 003; Tel: +33(0)561 333 134; E-mail: turrin@lcc-toulouse.fr.

<sup>b</sup> Université de Toulouse; UPS, INPT; LCC; F-31077 Toulouse, France

<sup>c</sup> Laboratoire des Interactions Moléculaires et Réactivité Chimique et Photochimique, CNRS UMR5063, Université Paul Sabatier, 118 Route de Narbonne, 31062 Toulouse cedex (France). Fax +33 5 61 55 81 55; E-mail: blanzat@chimie.ups-tlse.fr.

<sup>d</sup> Institut de Virologie, INSERM U544, Faculté de Médecine, 3 rue Koeberlé, F-67000 Strasbourg, France

---

#### Content:

|                                       |     |
|---------------------------------------|-----|
| Compound 2:                           | S2  |
| Compound 3:                           | S5  |
| Compound 3a-Gc'1:                     | S9  |
| Compound 3b-Gc'1:                     | S13 |
| Compound 3c-Gc'1:                     | S16 |
| Compound 4a:                          | S19 |
| Compound 4b:                          | S22 |
| Compound 5:                           | S25 |
| Compound 5a-Gc'1:                     | S29 |
| Compound 5b-Gc'1:                     | S33 |
| Compound 5c-Gc'1:                     | S36 |
| Compound 6a:                          | S39 |
| Compound 6b:                          | S43 |
| Compound 7:                           | S46 |
| Compound 7a-Gc'1:                     | S50 |
| Compound 7b-Gc'1:                     | S54 |
| Compound 7c-Gc'1:                     | S58 |
| Compound 5c-Gc'1 and 7c-Gc'1 (NOESY): | S62 |

# Compound 2

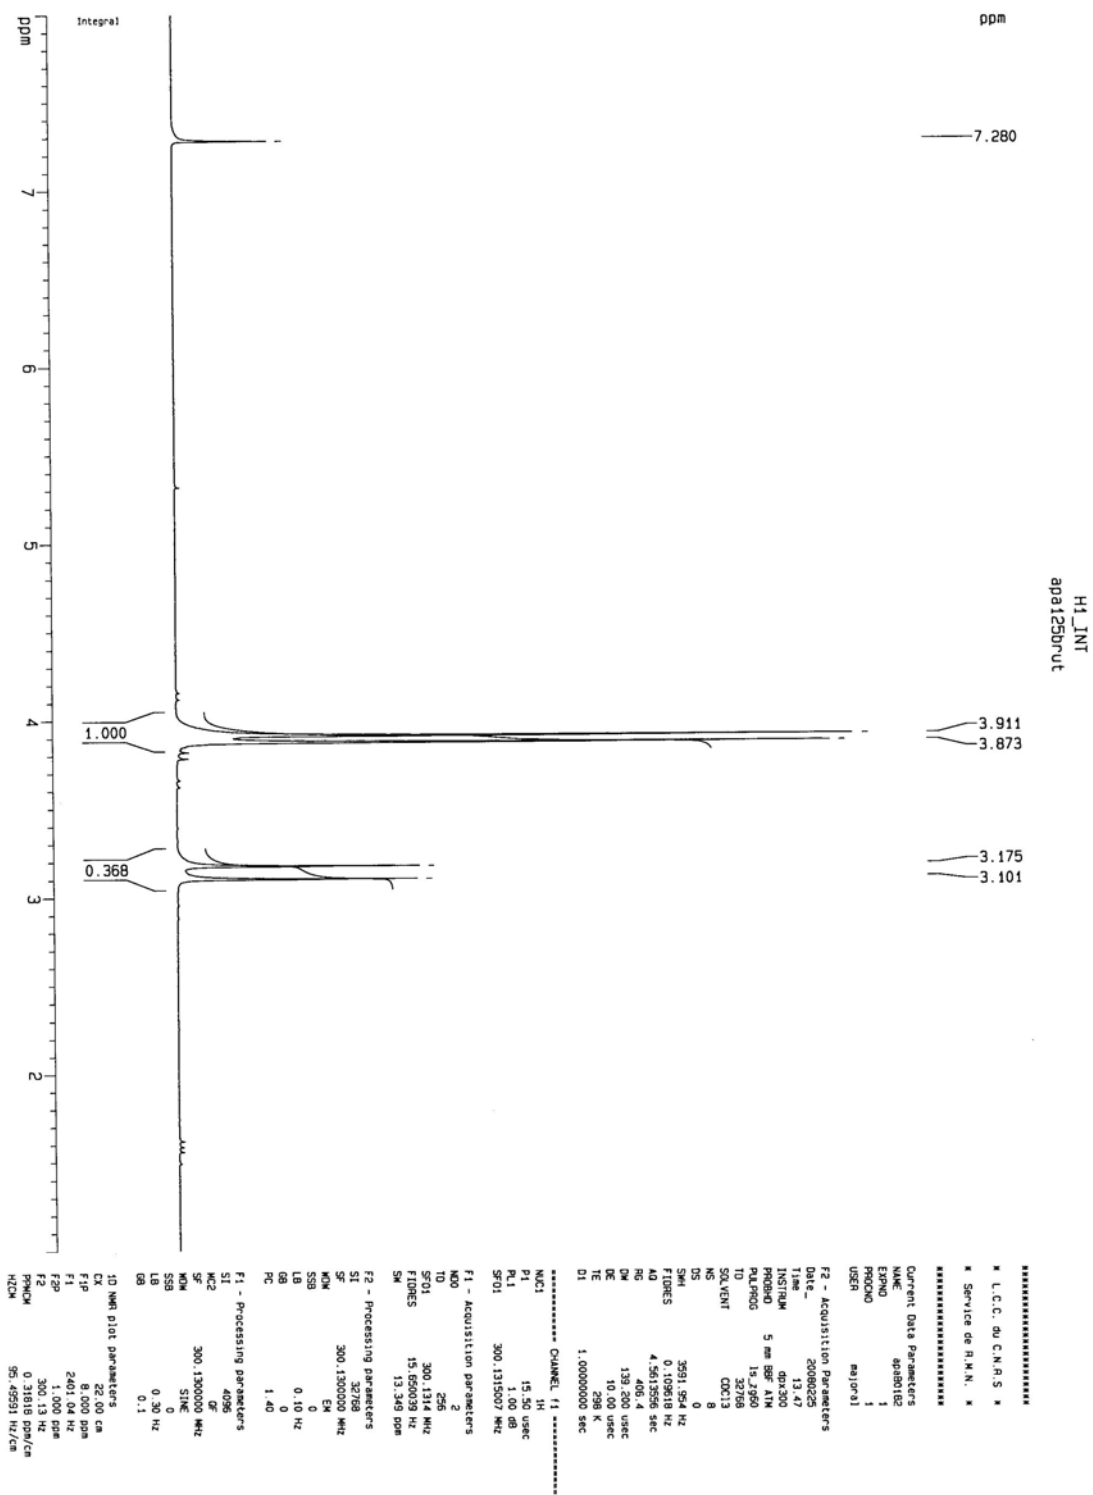

# Compound 2

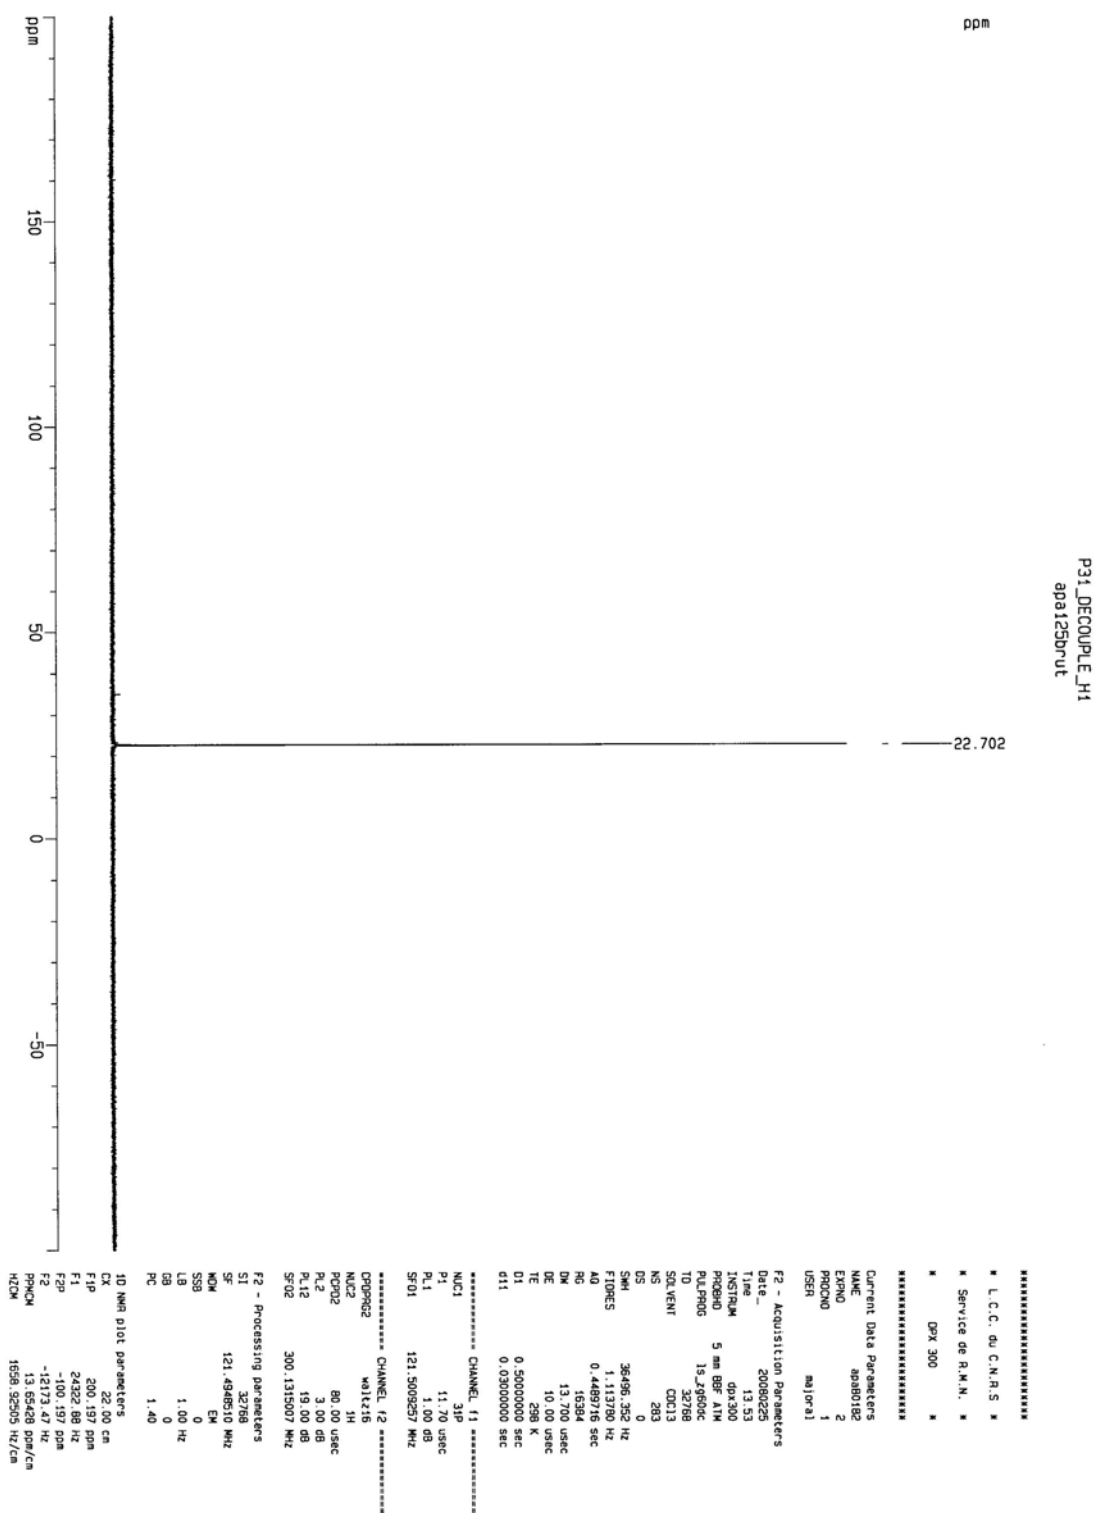

# Compound 2

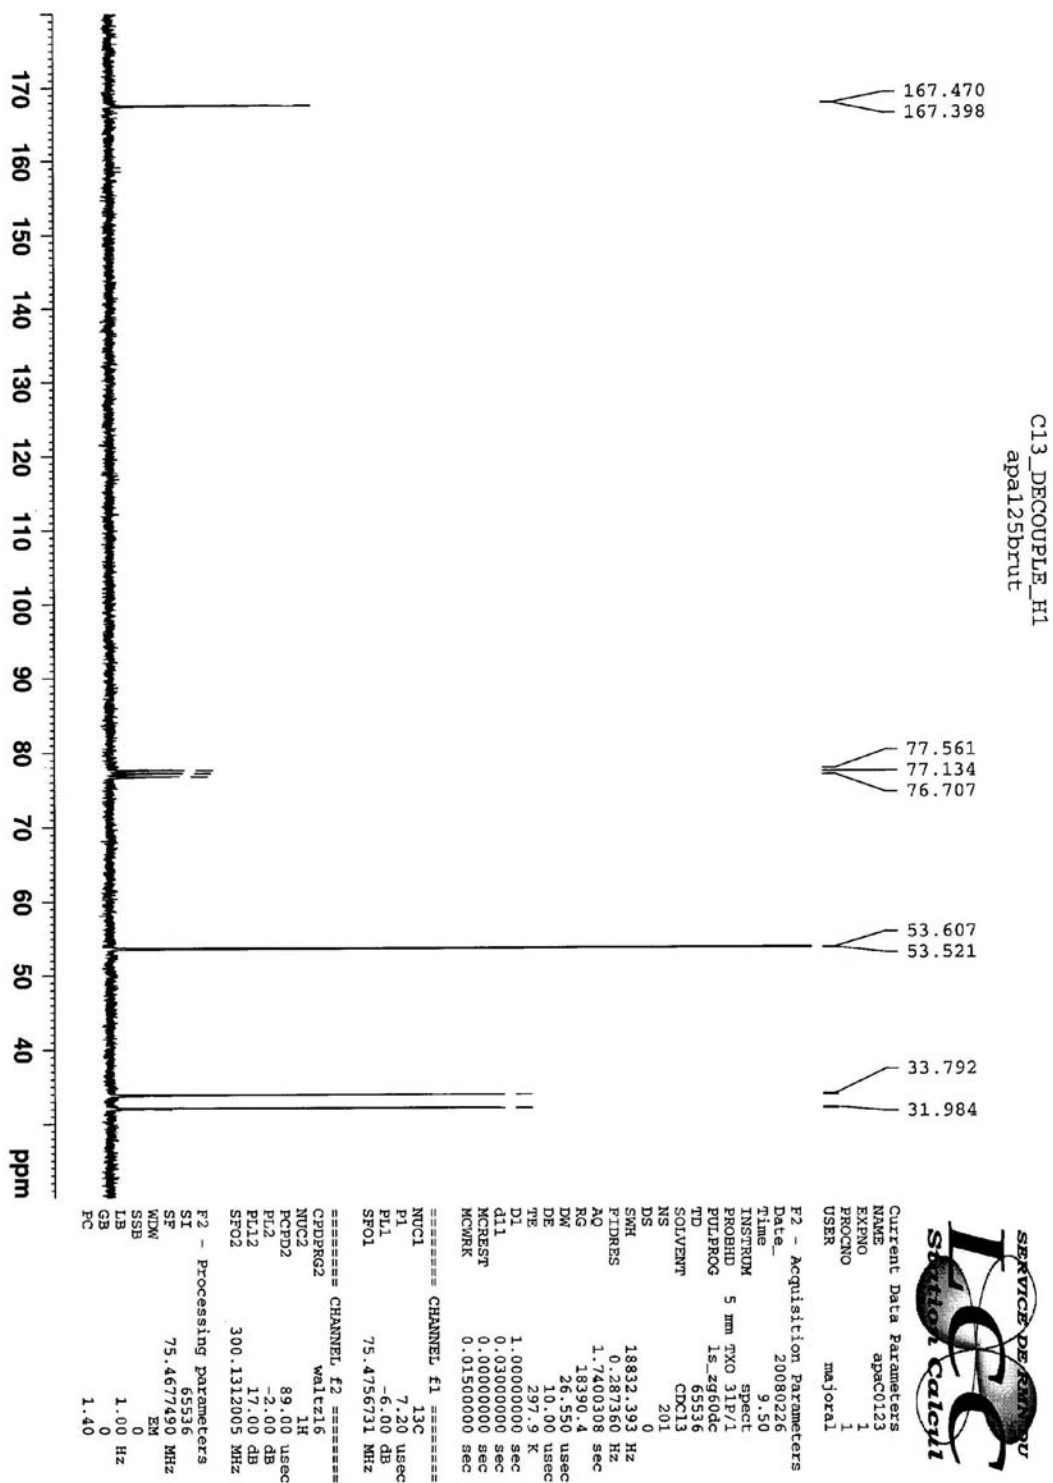

### Compound 3

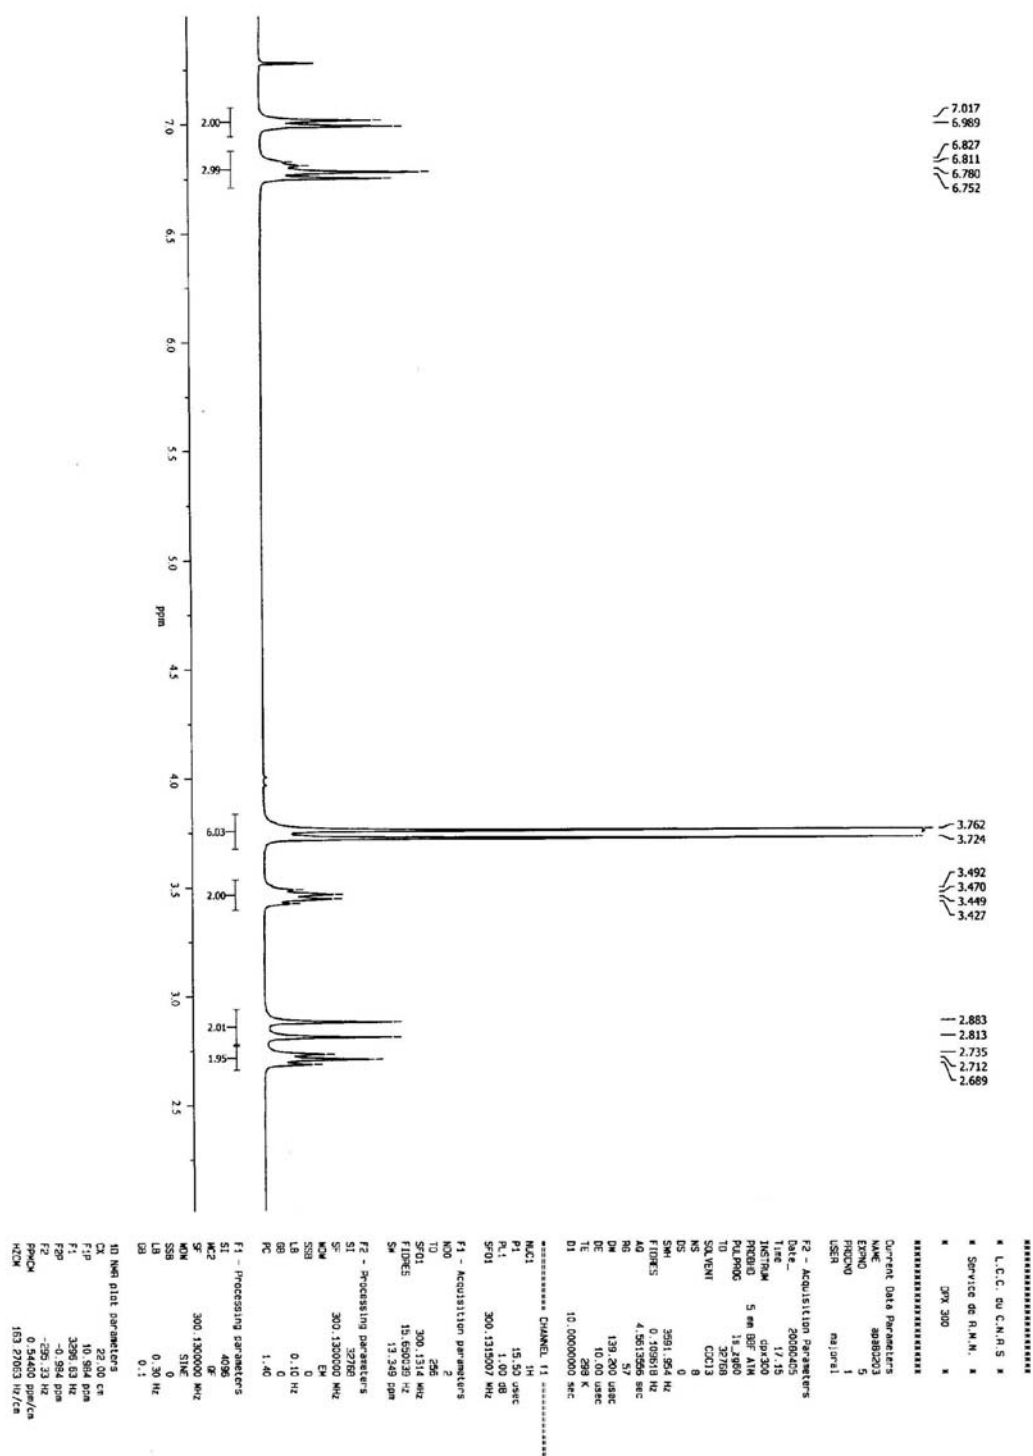

# Compound 3

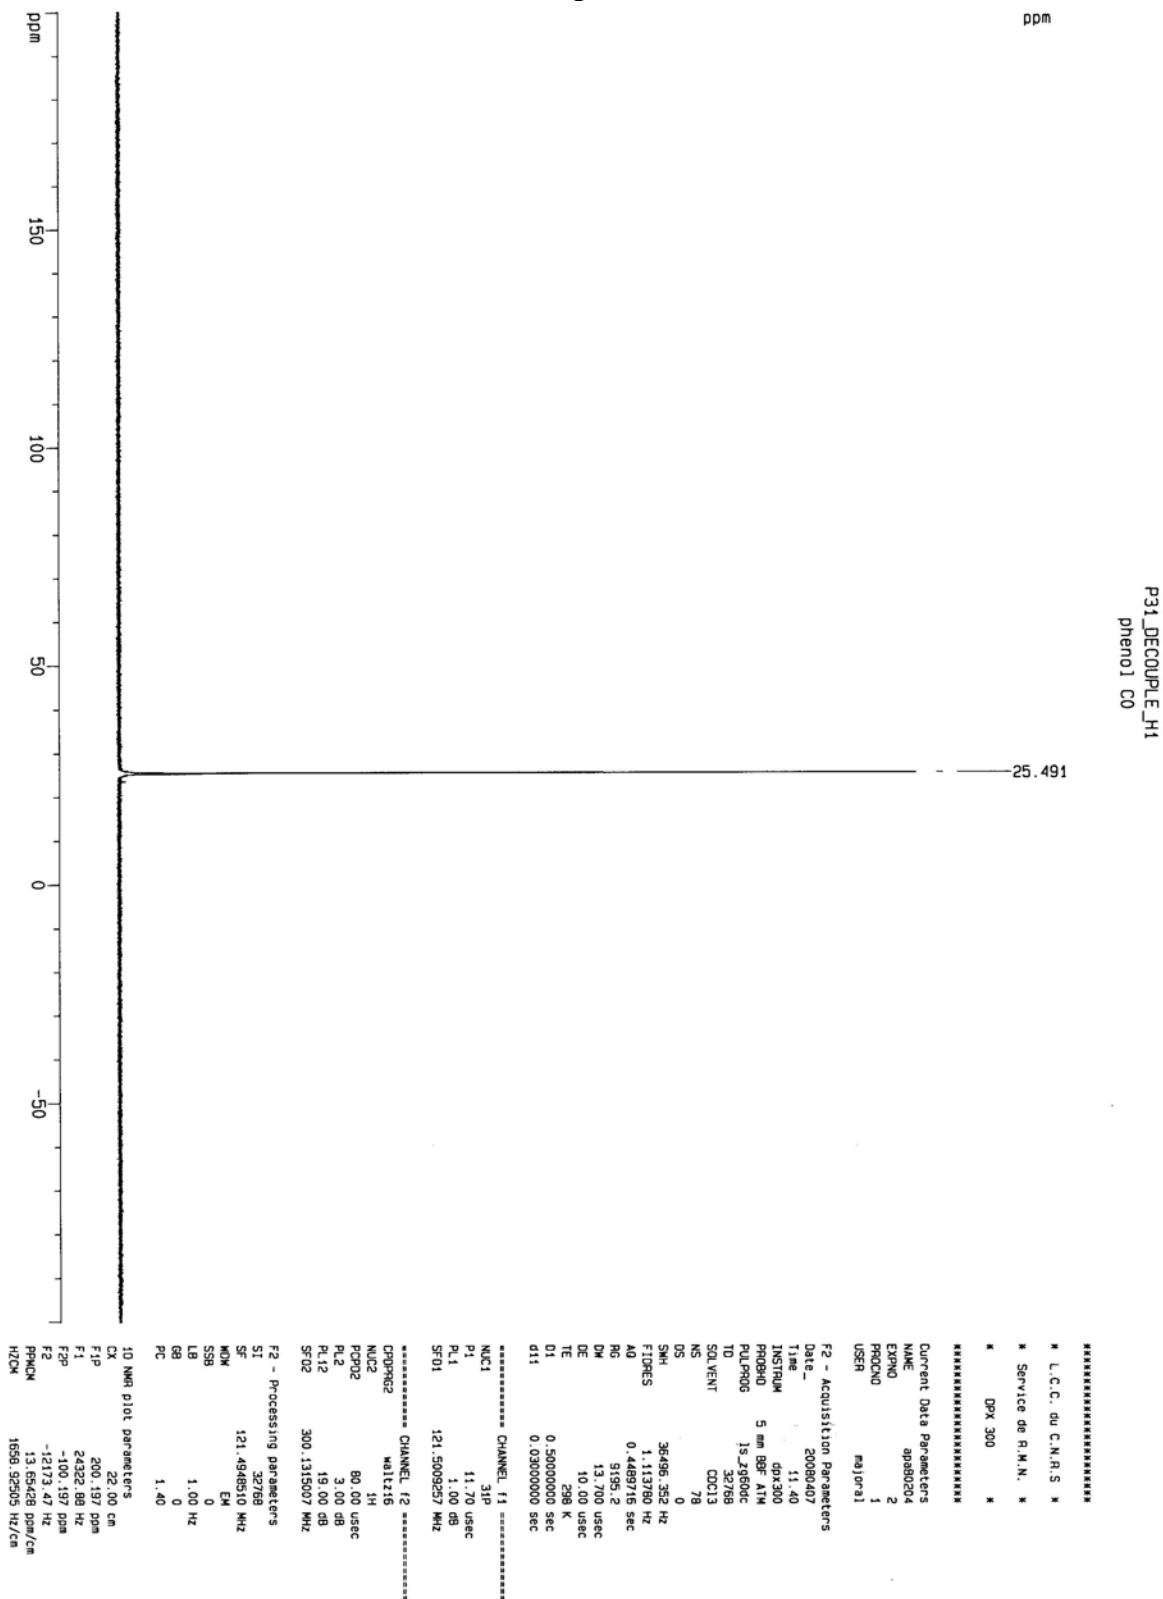

# Compound 3

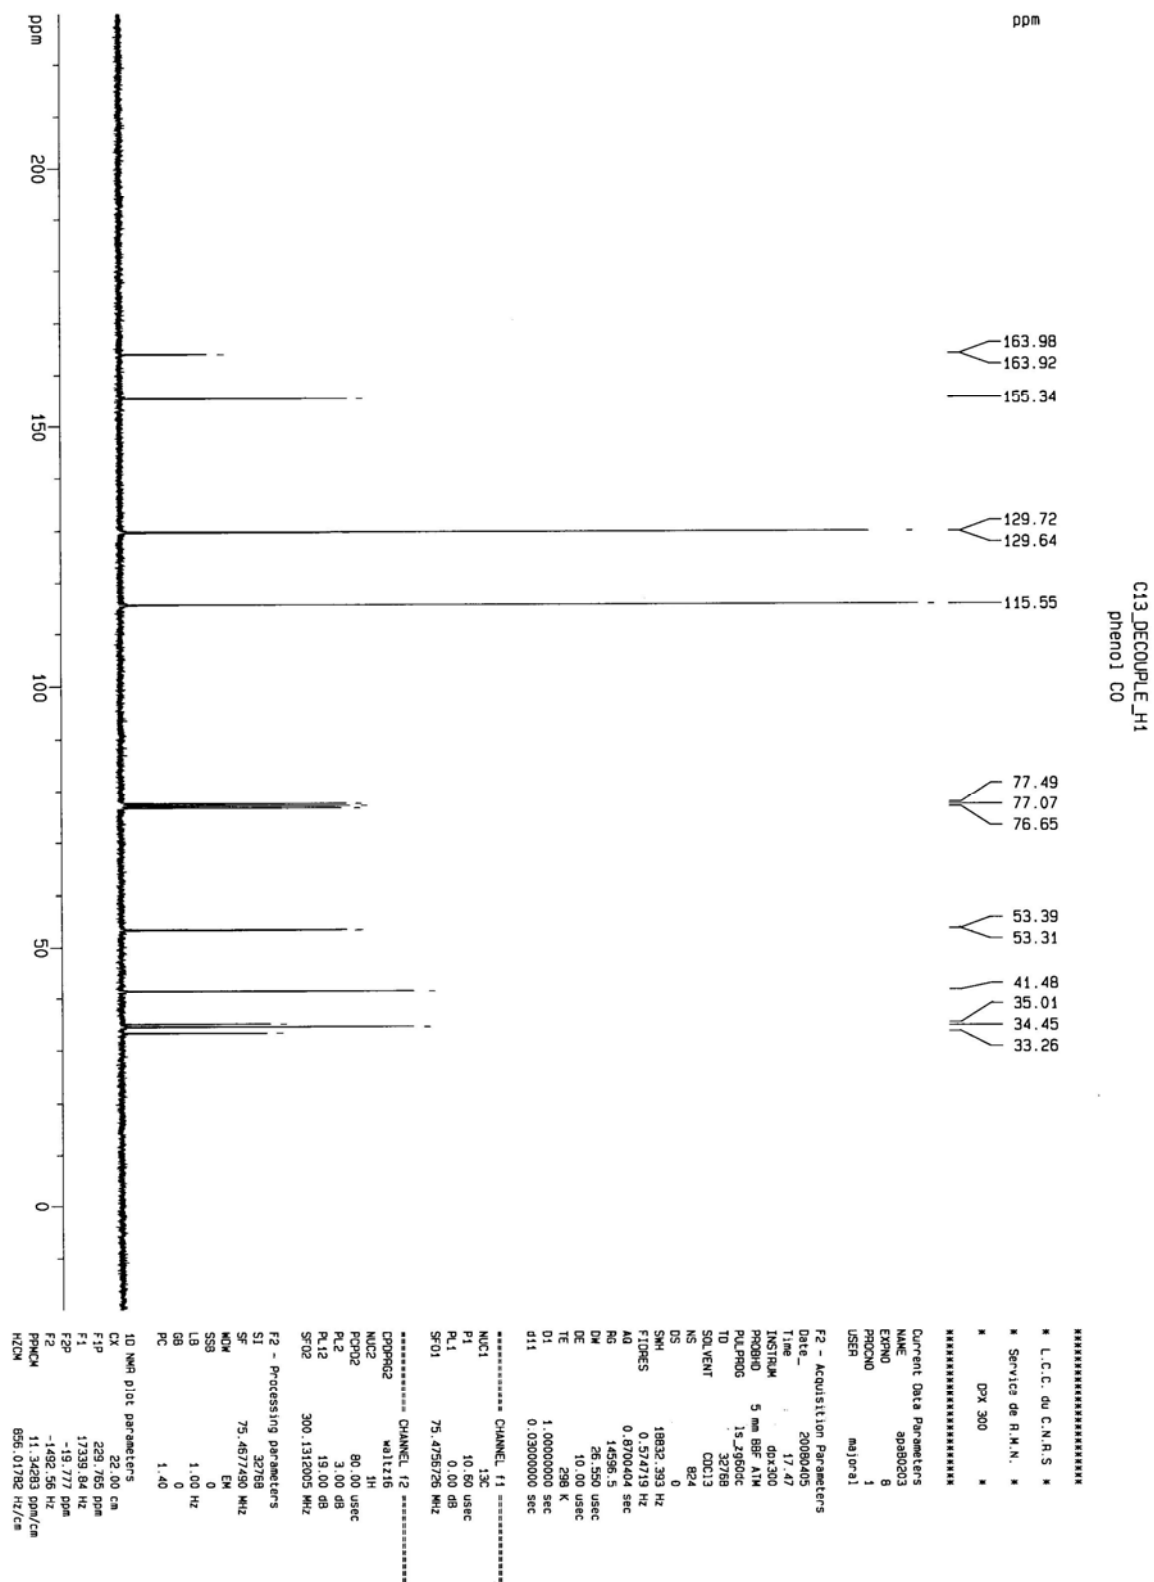

# Compound 3

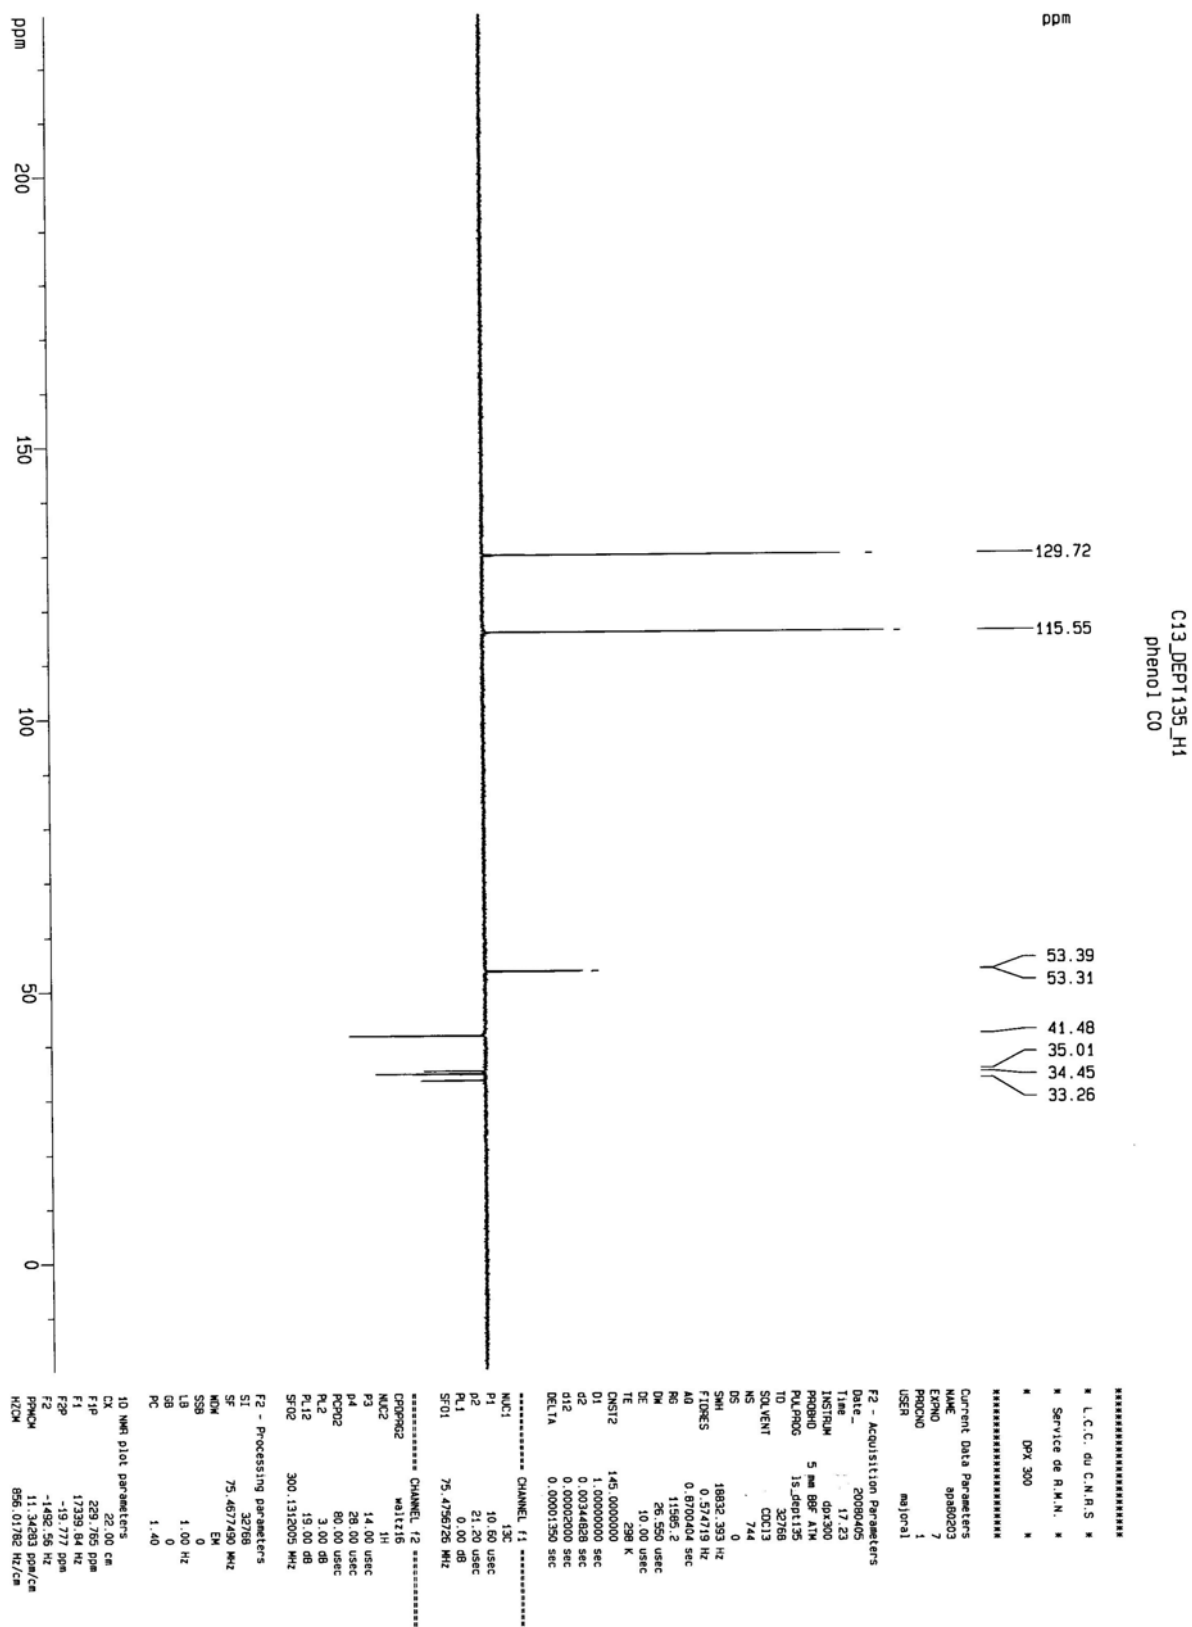



# Compound 3a-Gc'<sub>1</sub>

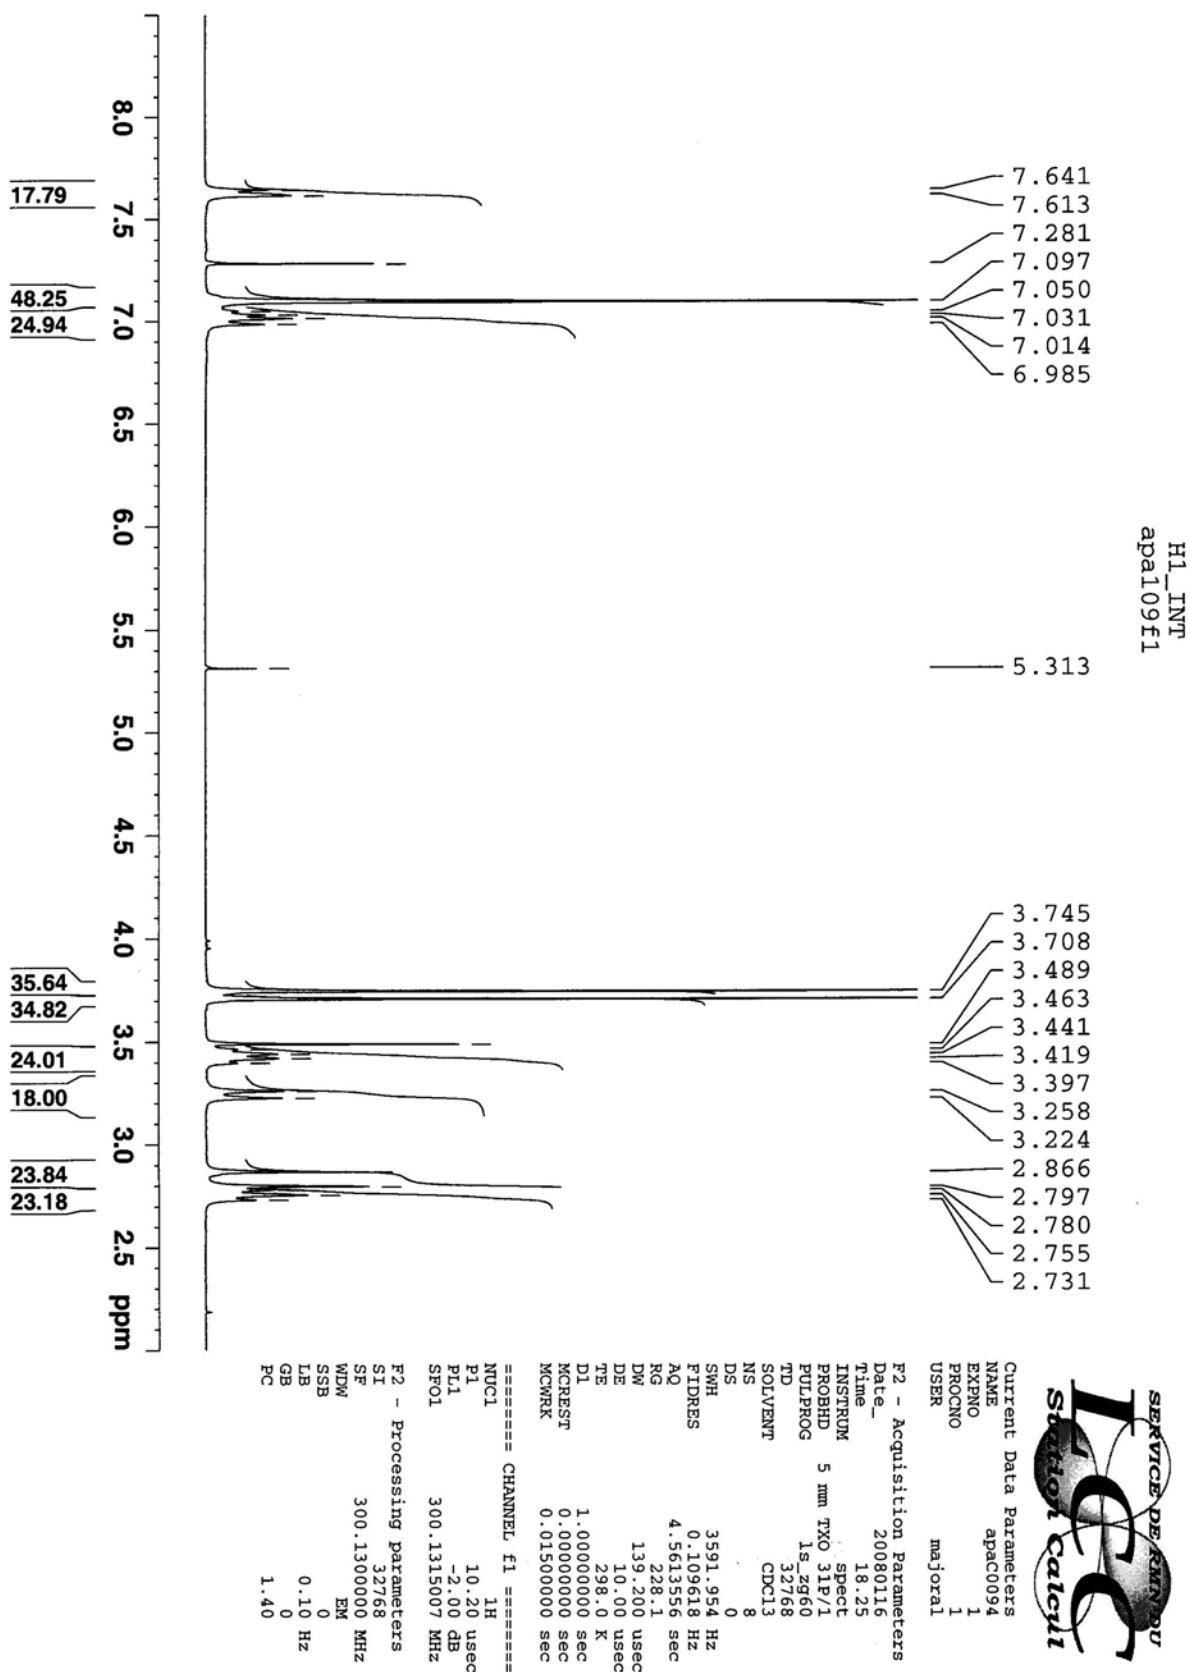

# Compound 3a-Gc'<sub>1</sub>

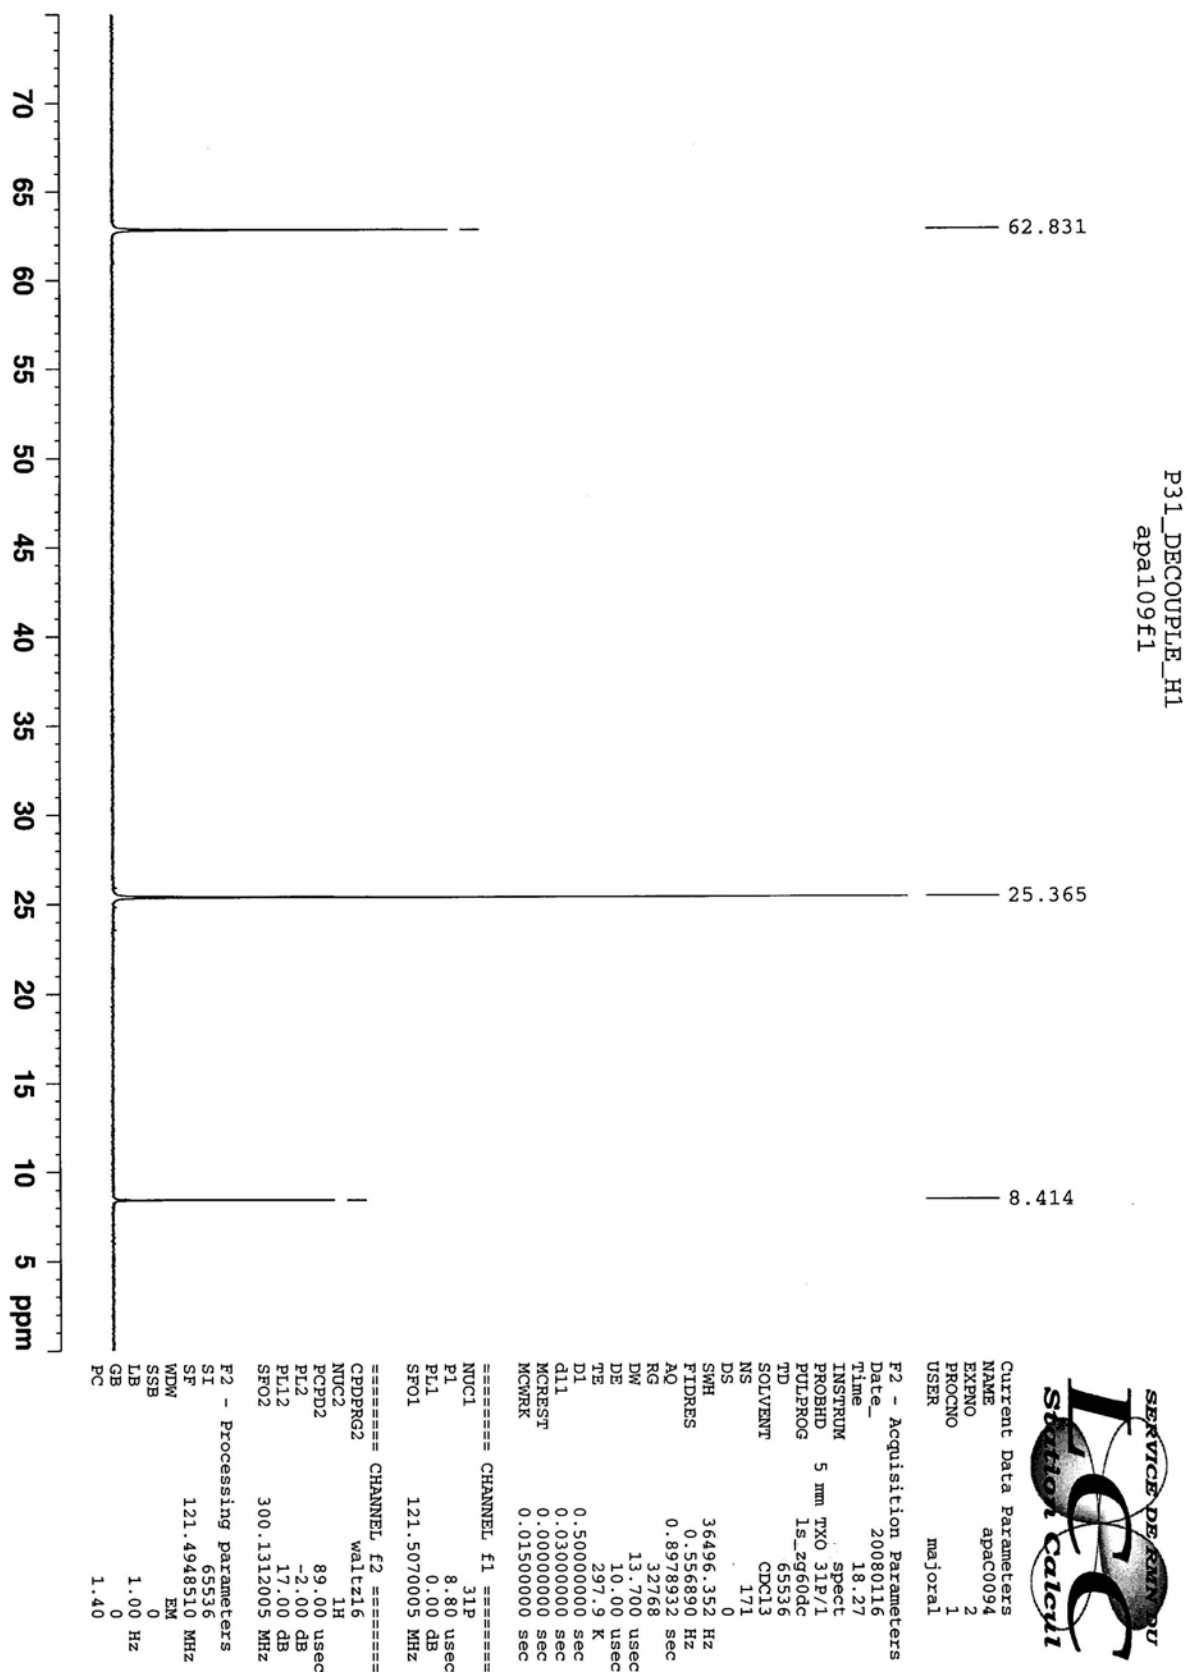

compound 3a-Gc'<sub>1</sub>

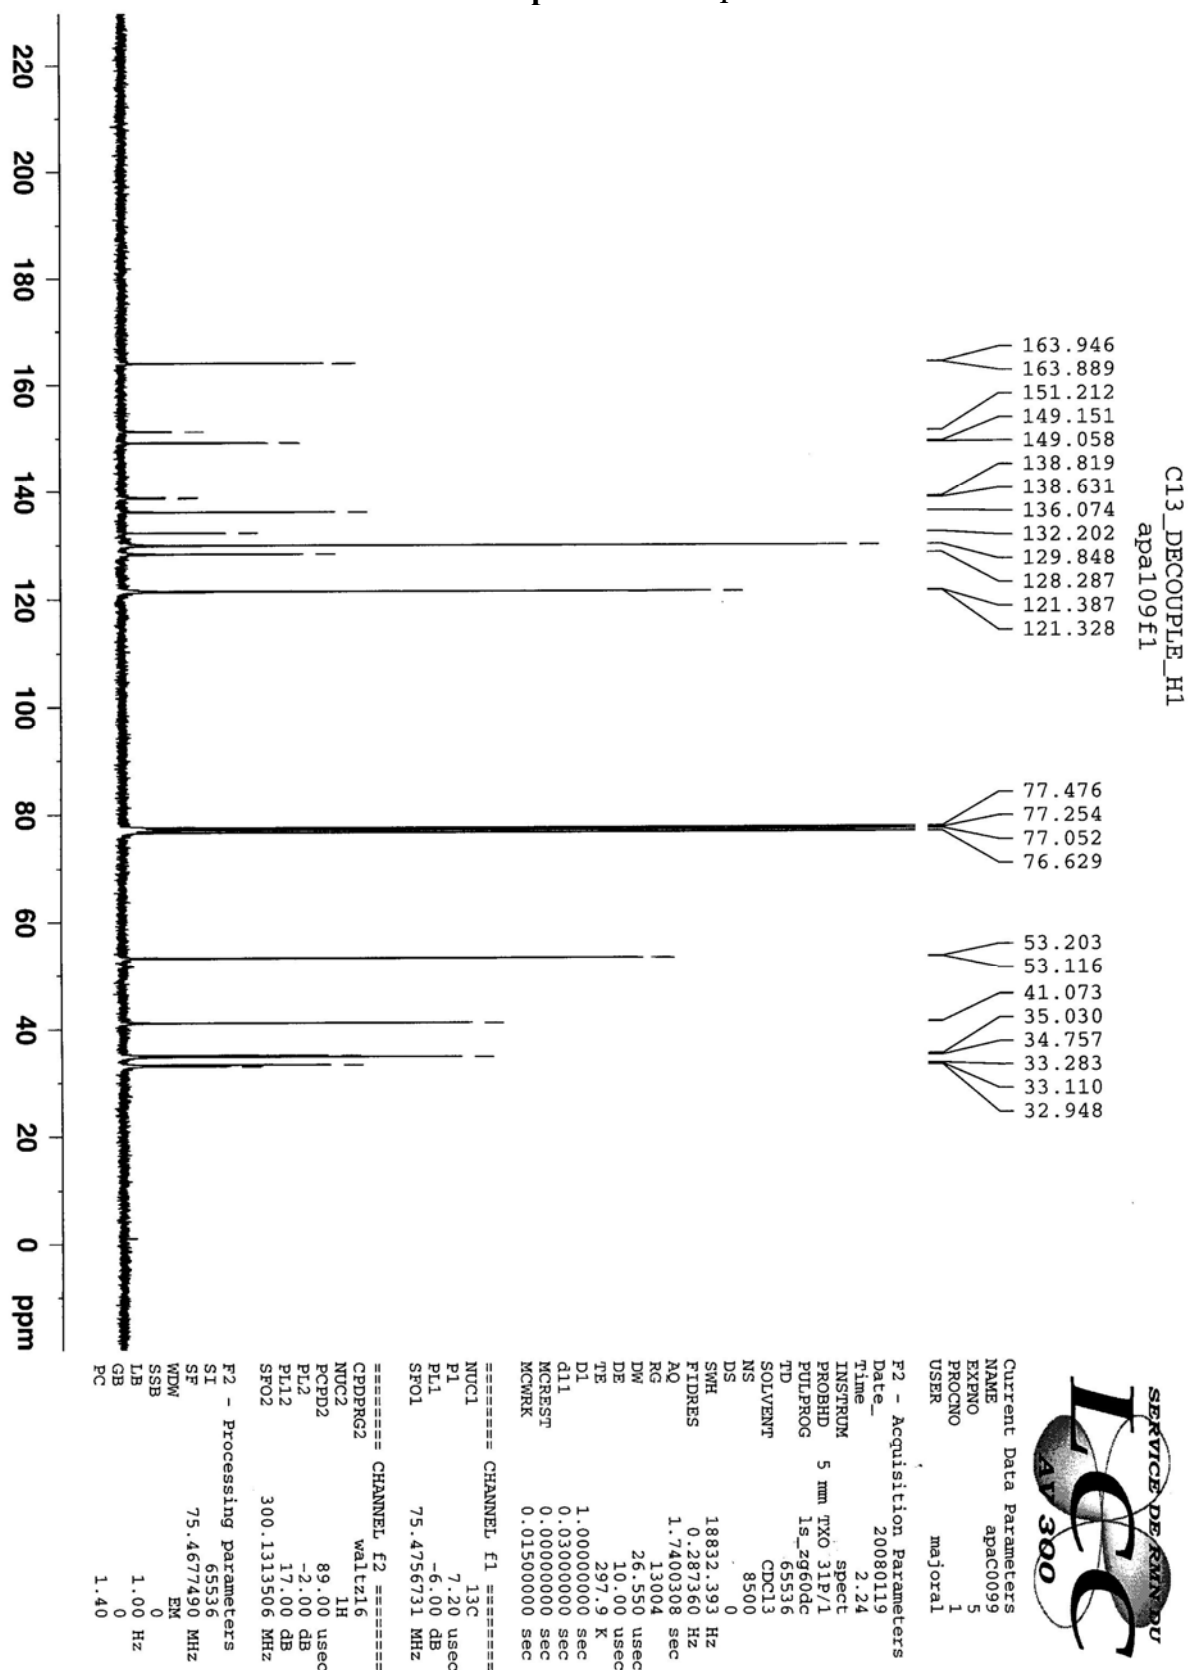

compound 3a-Gc'<sub>1</sub>

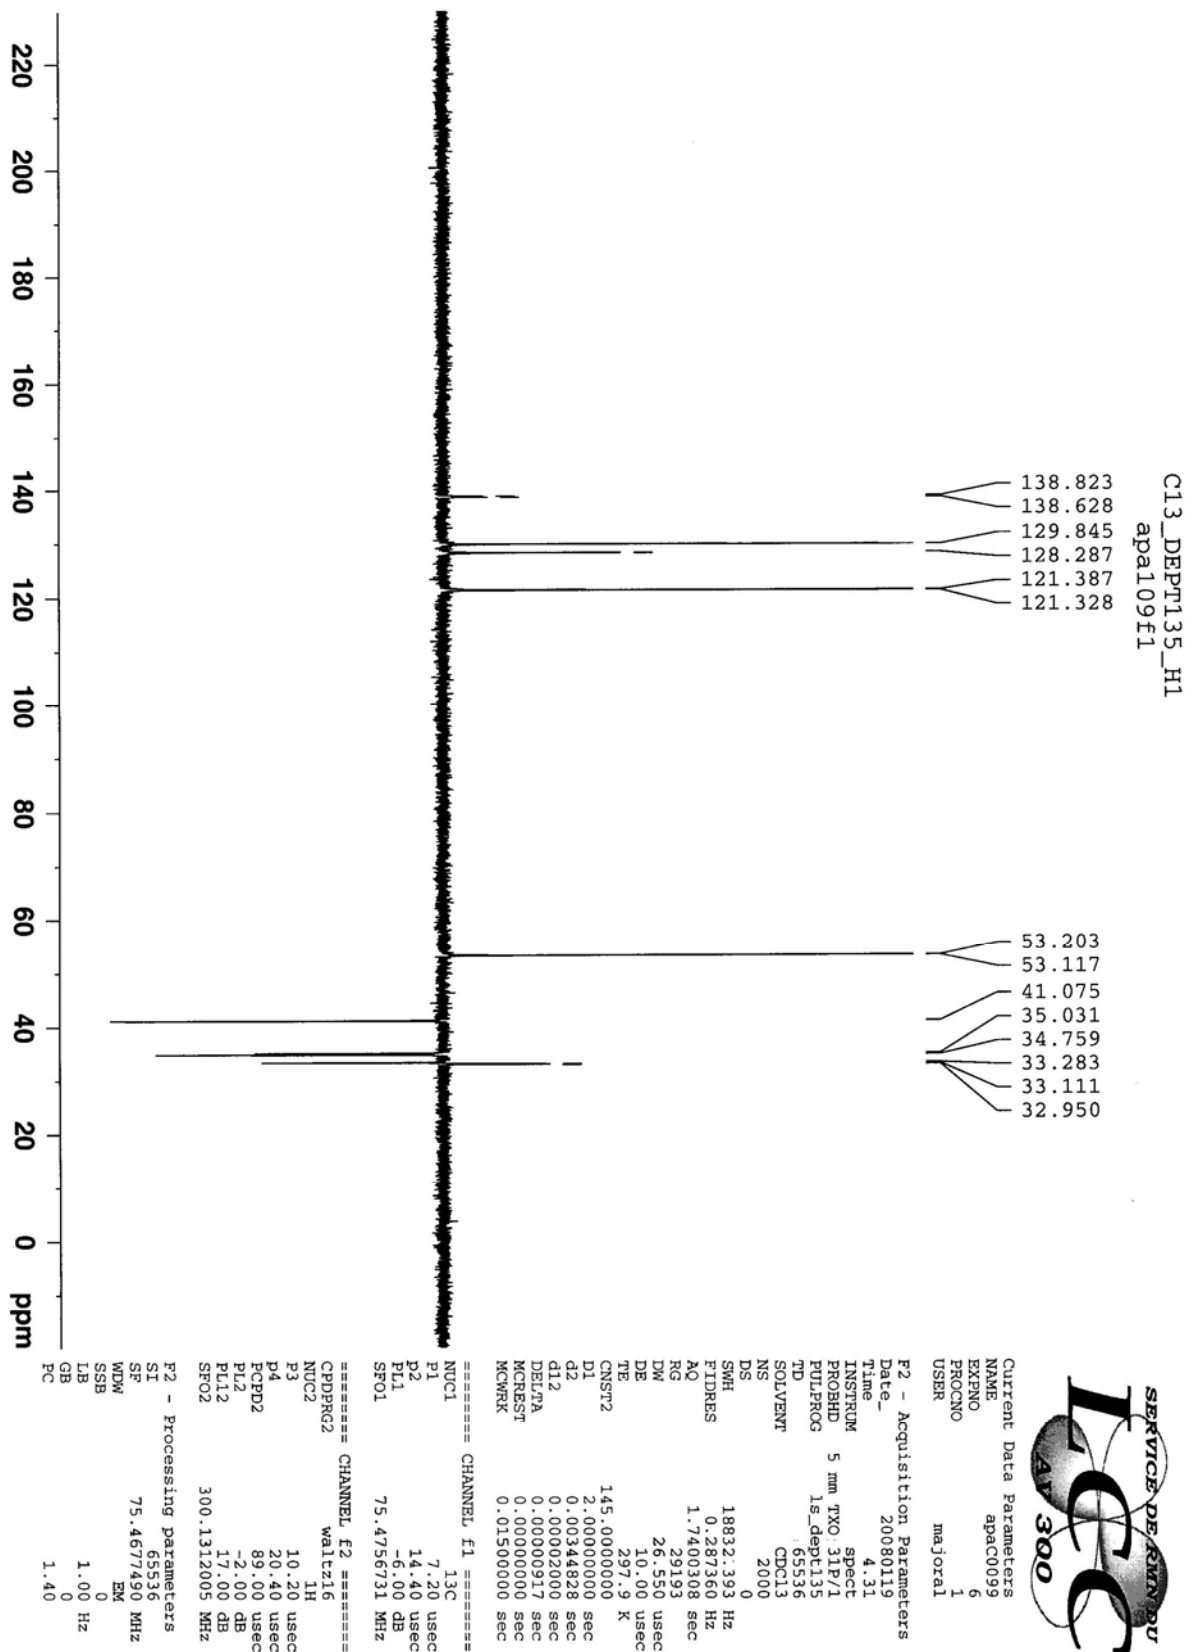

# Compound 3b-Gc'<sub>1</sub>

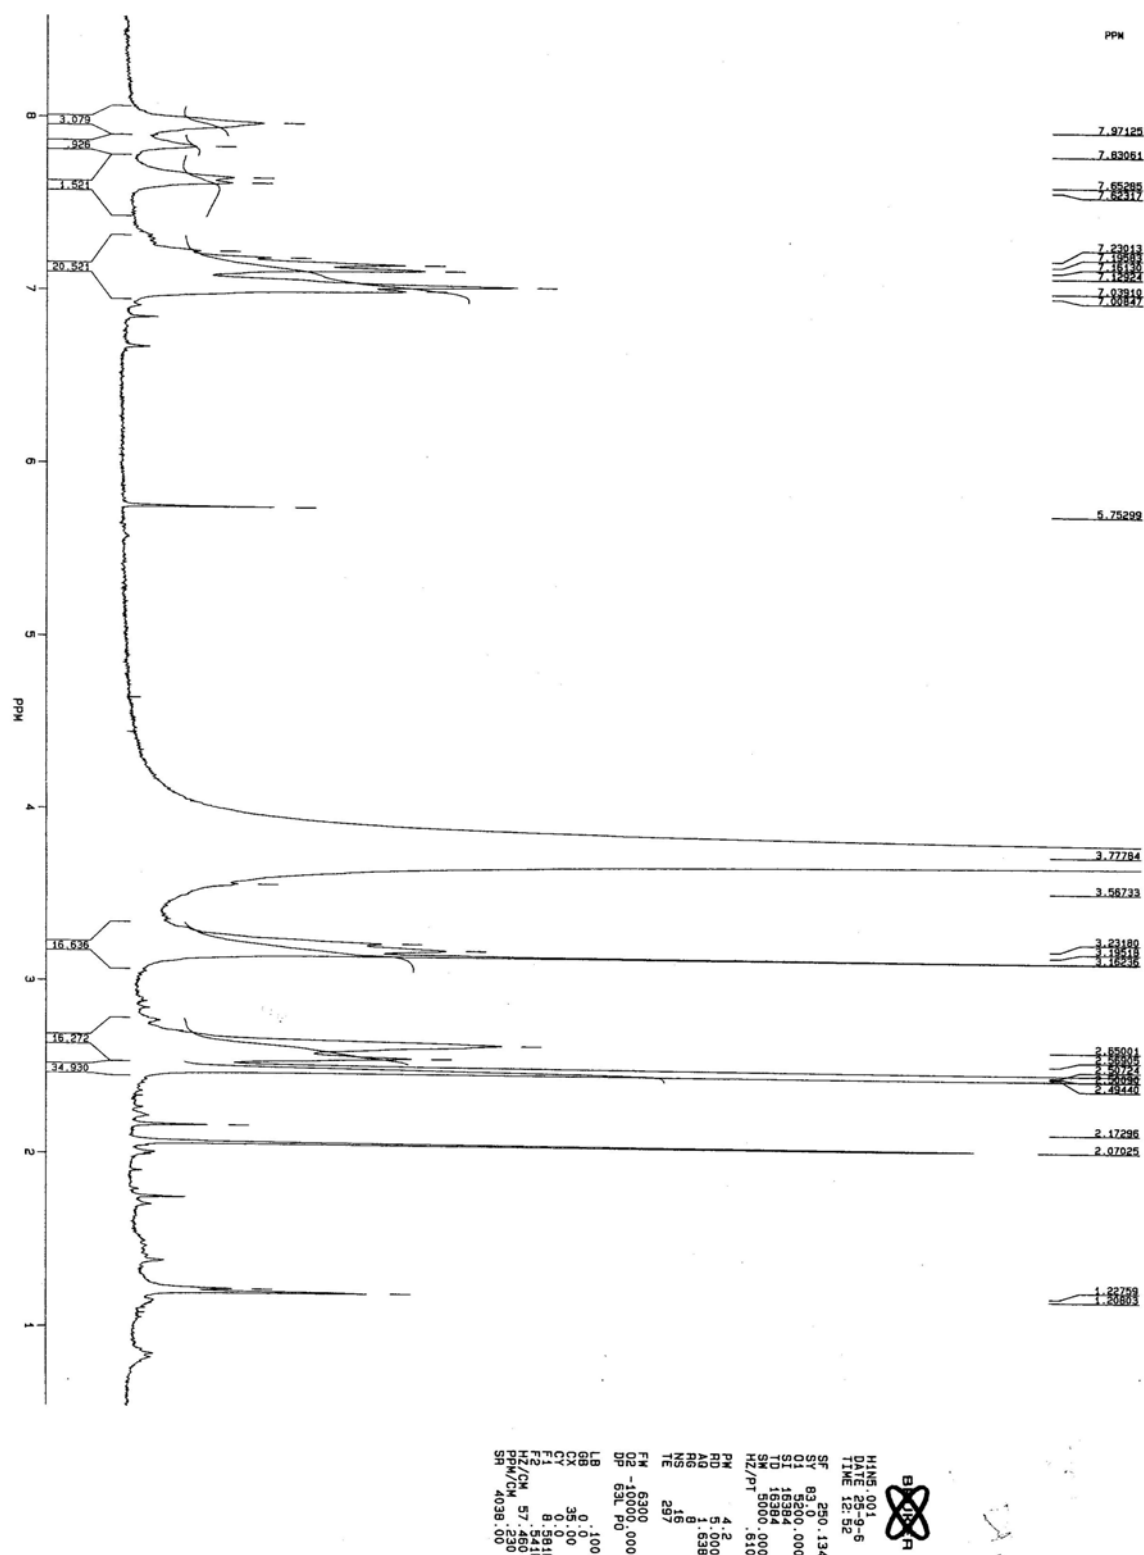

# Compound 3b-Gc'<sub>1</sub>

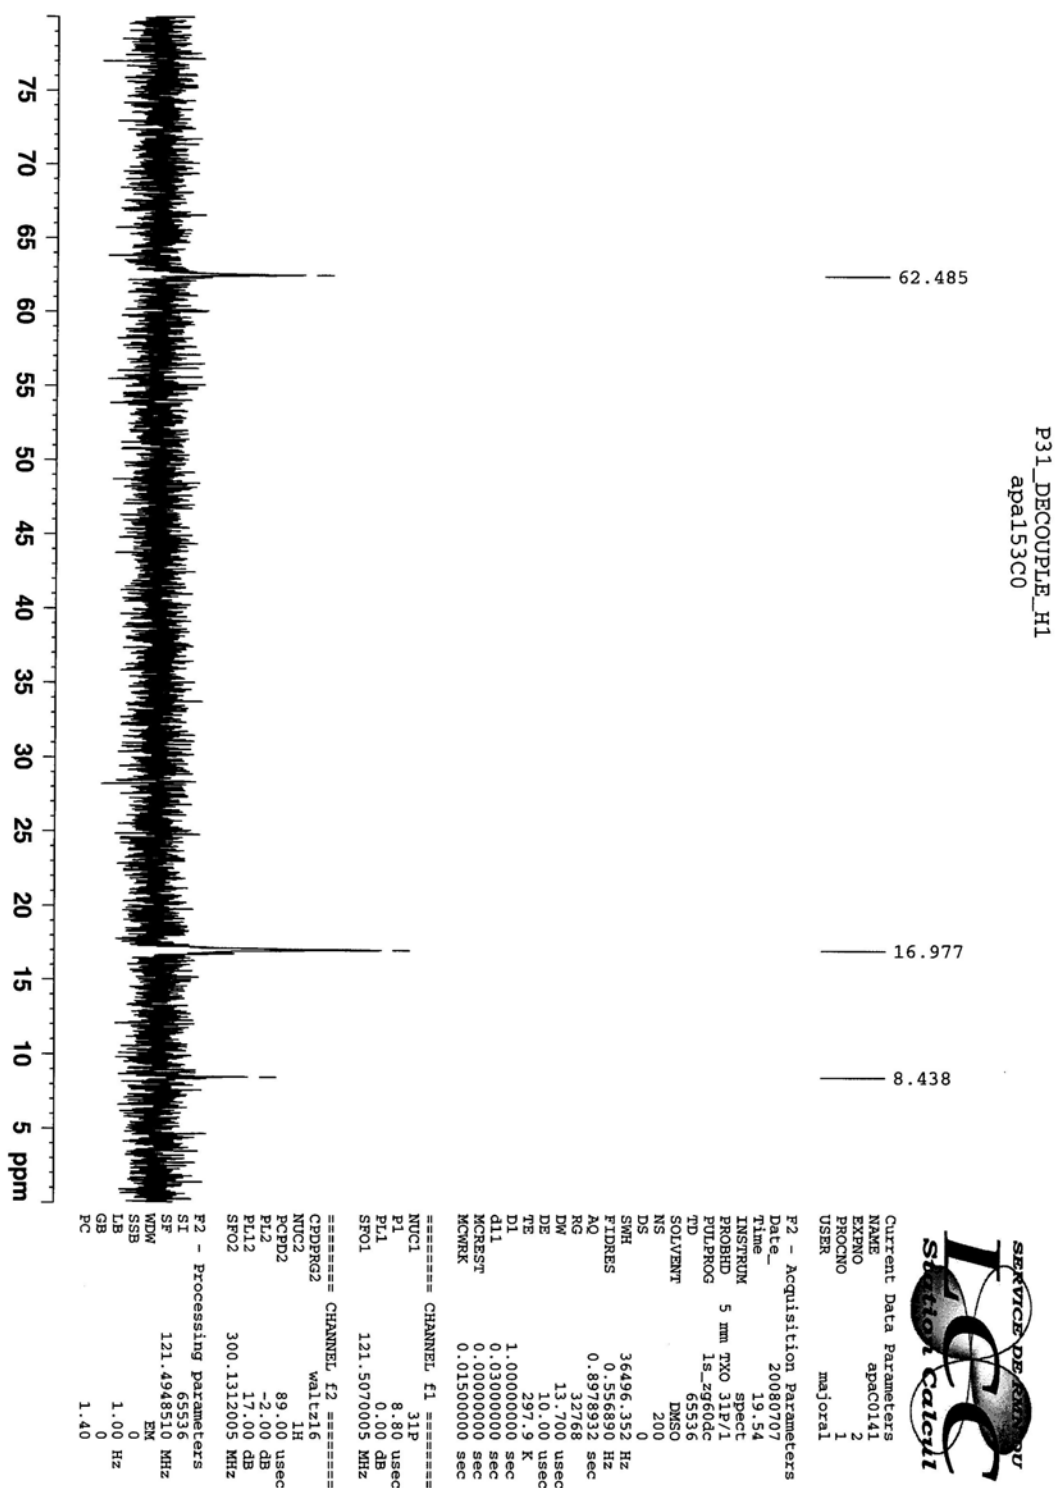

# Compound 3b-Gc'<sub>1</sub>

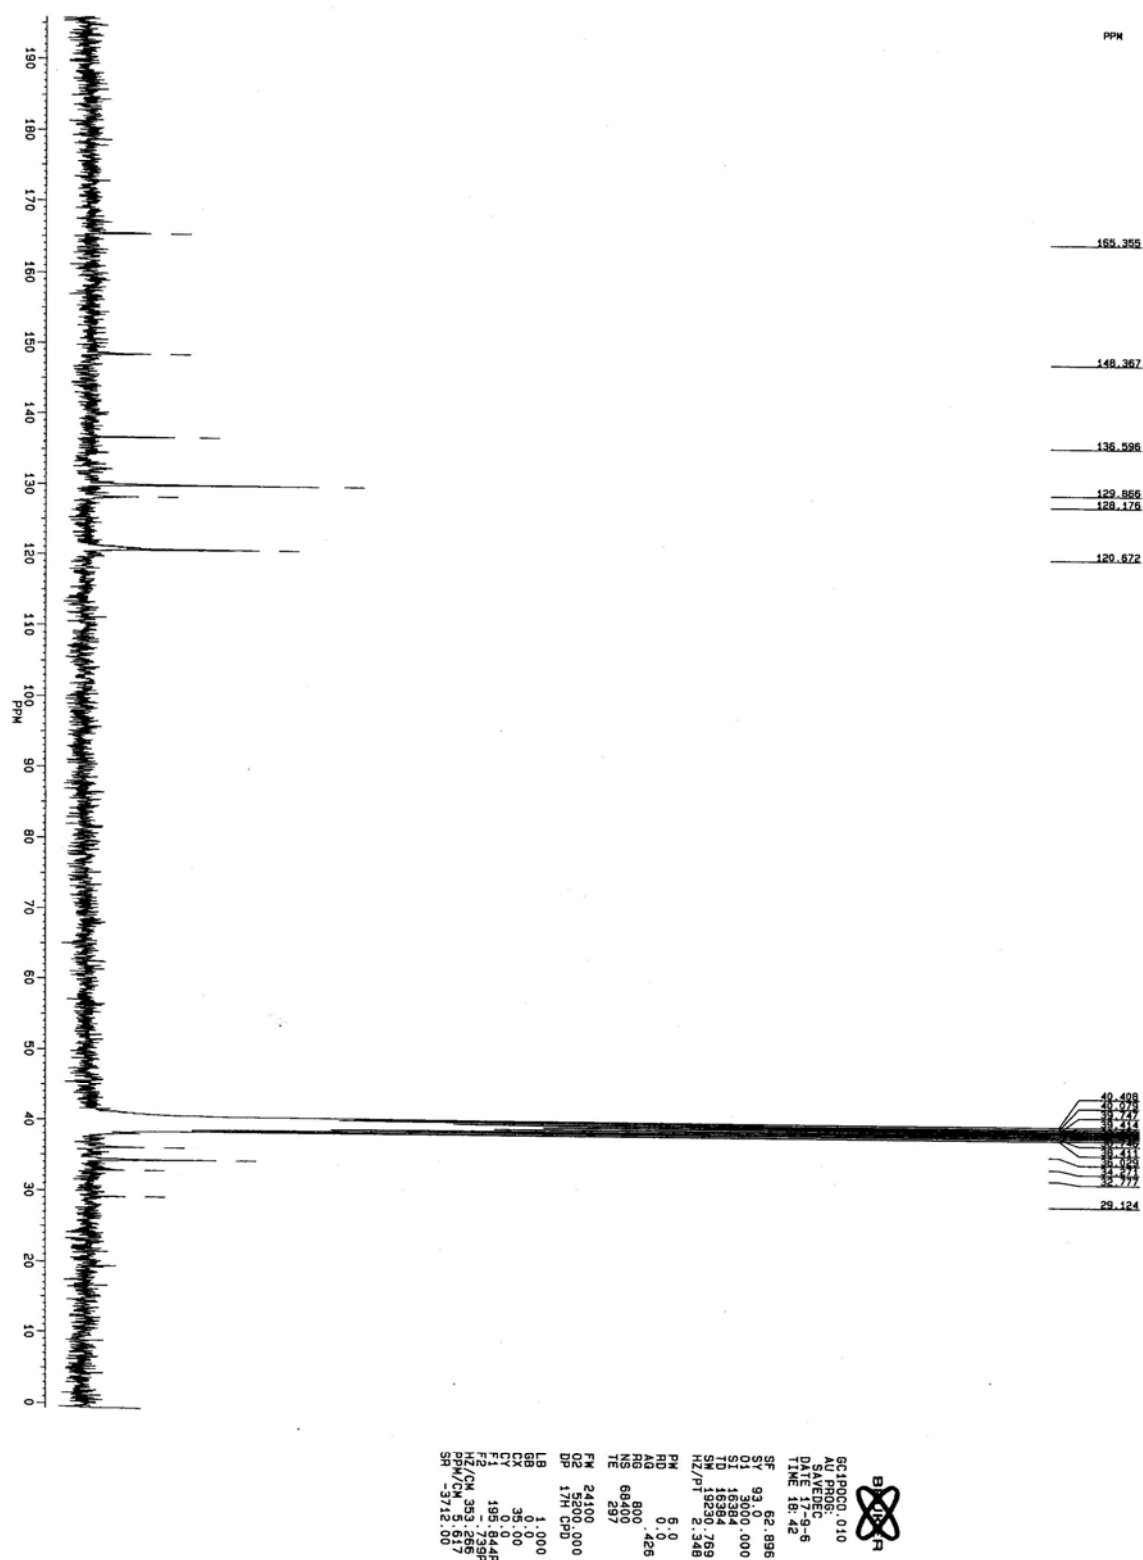





# Compound 3c-Gc'1

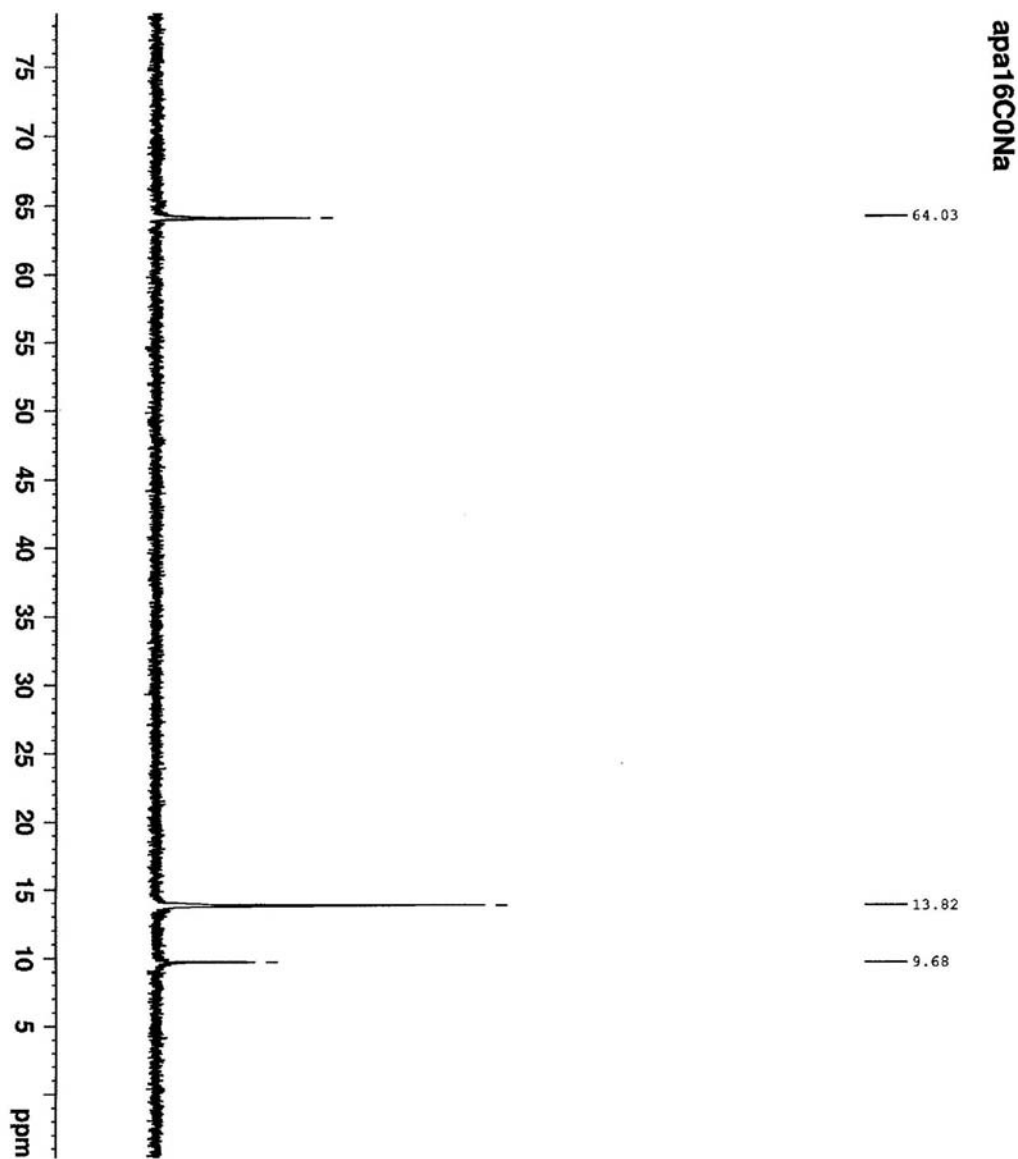

```

Current Data Parameters
NAME      perez_300c
EXPNO     46
PROCNO    1

F2 - Acquisition Parameters
Date_     20080617
Time      12.54
INSTRUM   spect
PROBHD    5 mm PABBO Bb-
PULPROG   zgpg30
SOLVENT   DMSO
NS         160
DS         4
SWH        3962.809 Hz
FIDRES     0.328261 Hz
AQ         0.352264 sec
RG          32
AQ         0.352264 sec
DE         9.400 usec
TE         300.2 K
D1         0.5000000 sec
d11        0.0300000 sec
DELTA      0.4000001 sec
TD         100

===== CHANNEL f1 =====
NUC1       131
P1         9.50 usec
PL1        0.00 dB
SFO1       121.498510 MHz

===== CHANNEL f2 =====
NAME       waltz16
NUC2       131
P2         100.00 usec
PL2        -1.00 dB
PCPG2      1.00 dB
SFO2       300.135010 MHz

F2 - Processing parameters
SI         32768
SF         121.498510 MHz
WDW        EM
SSB        0
LB          1.00 Hz
GB          0
PC          1.40
  
```

# Compound 3c-Gc'1

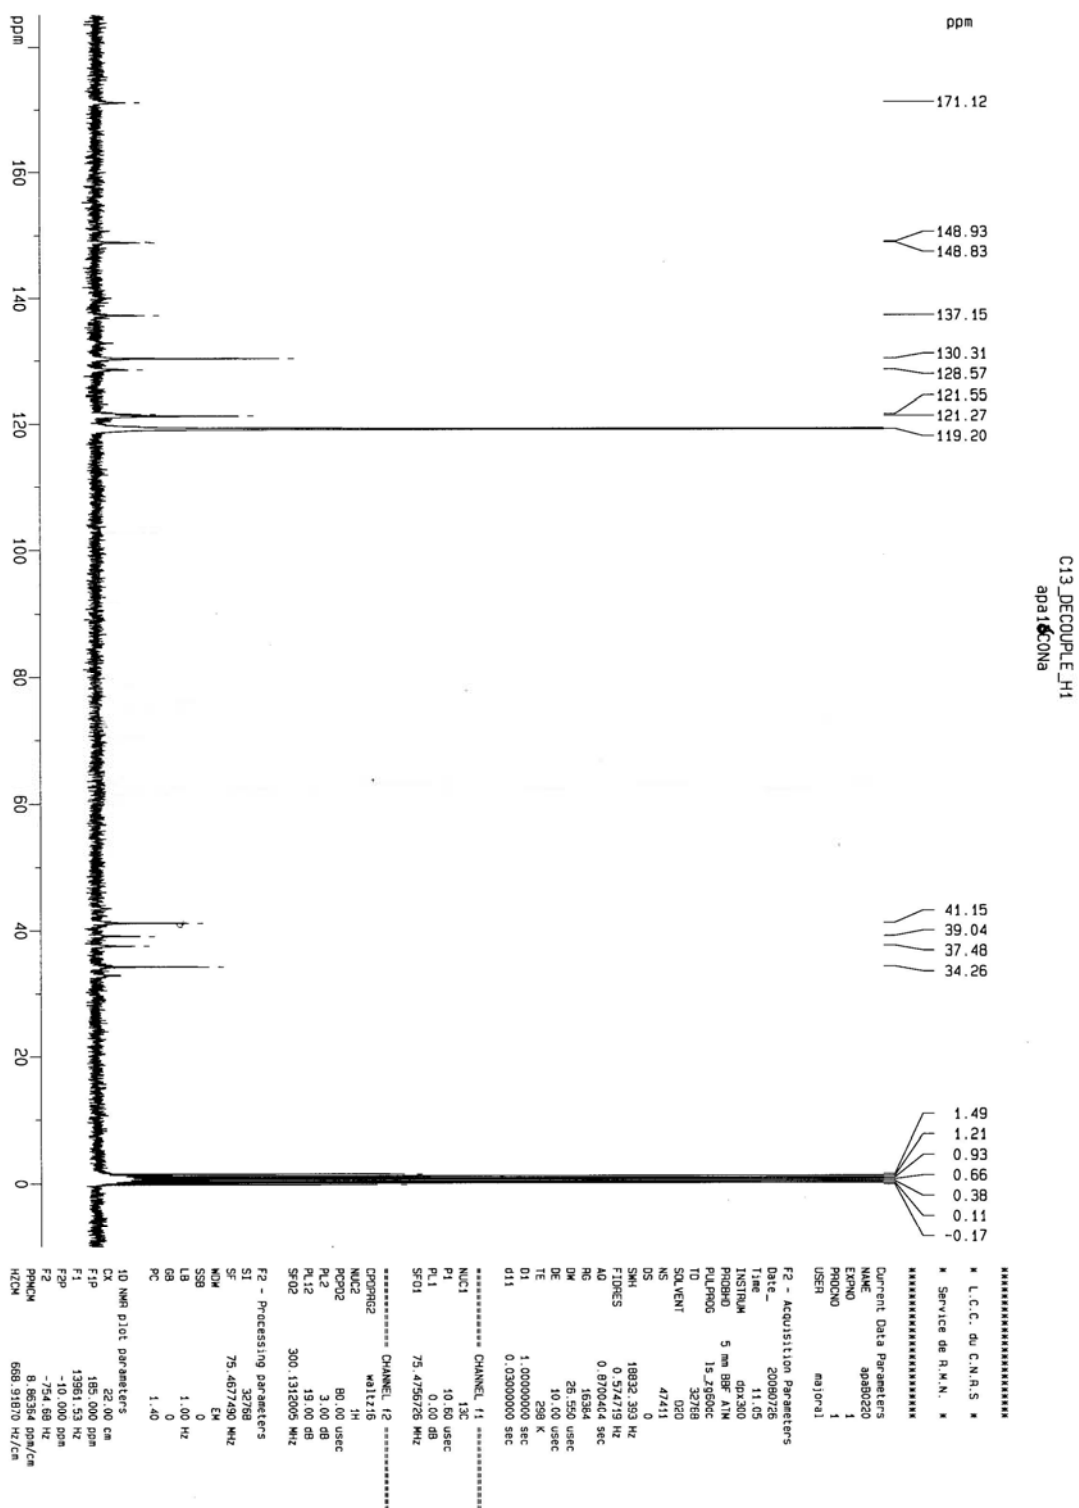

# Compound 4a

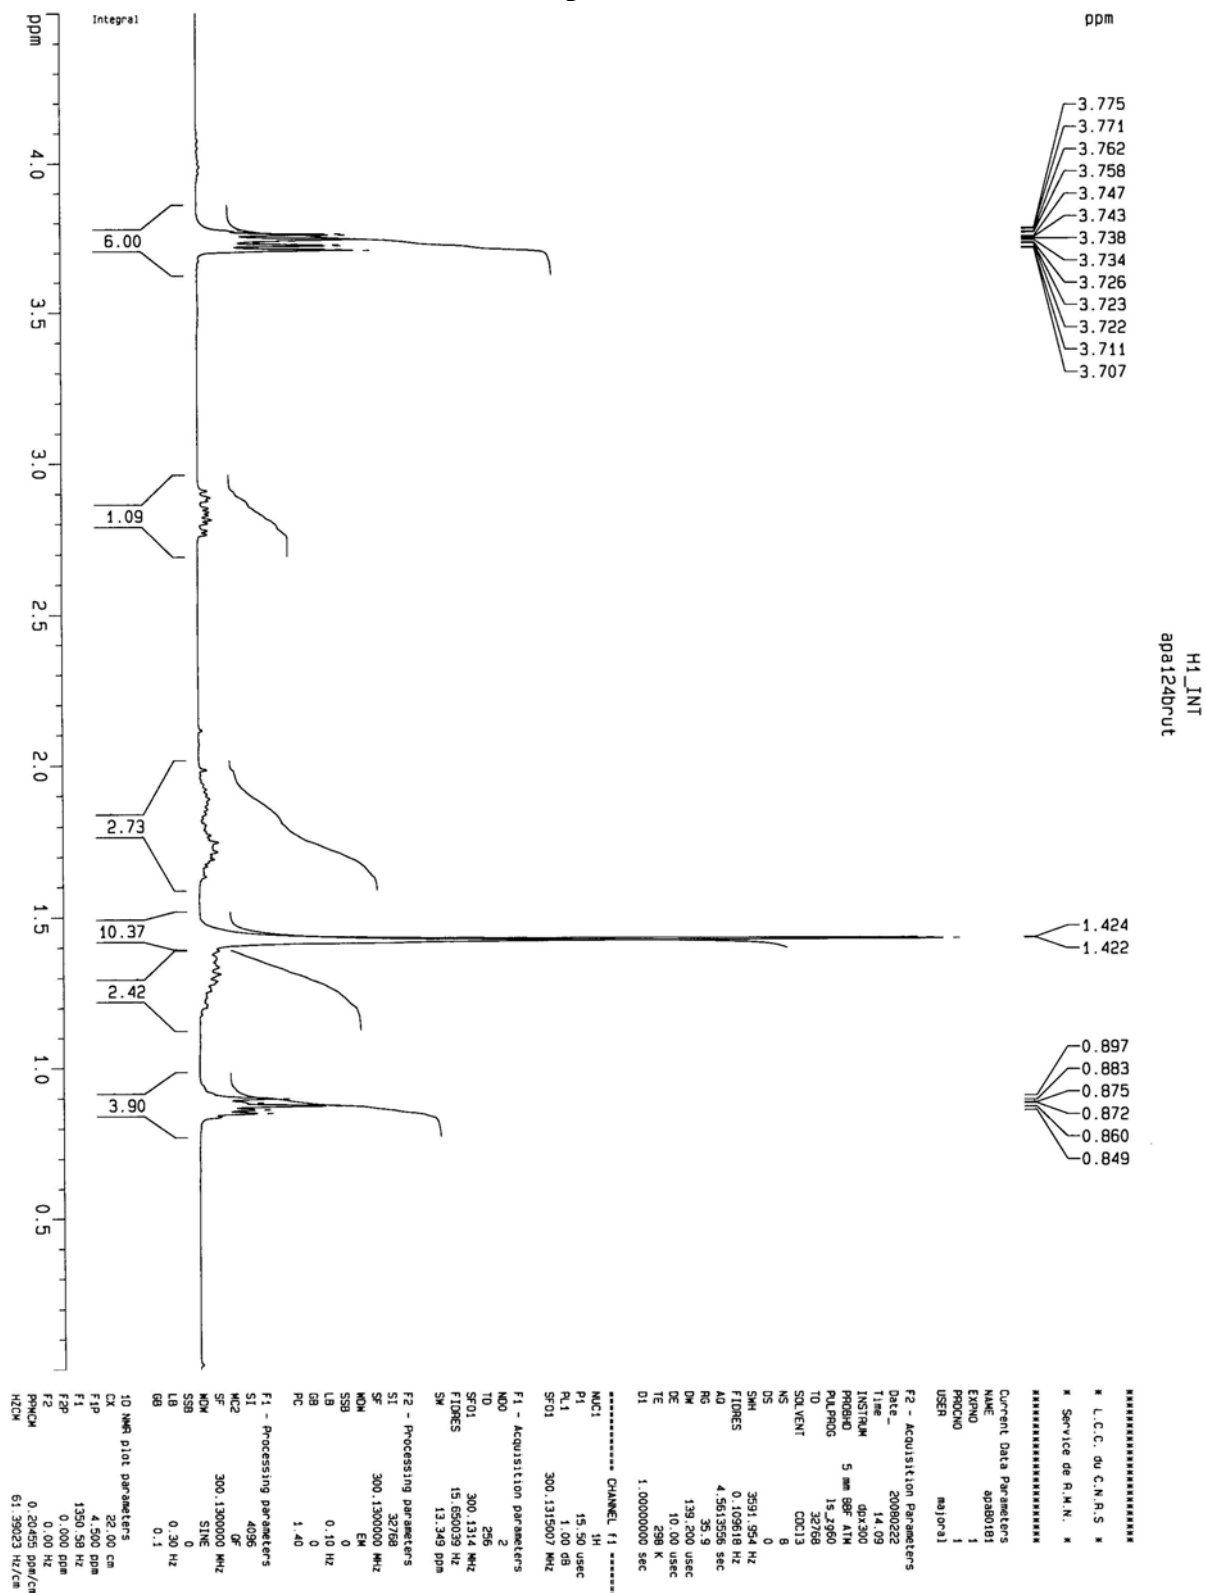

# Compound 4a

P31\_DECOUPLE\_H1  
apa124

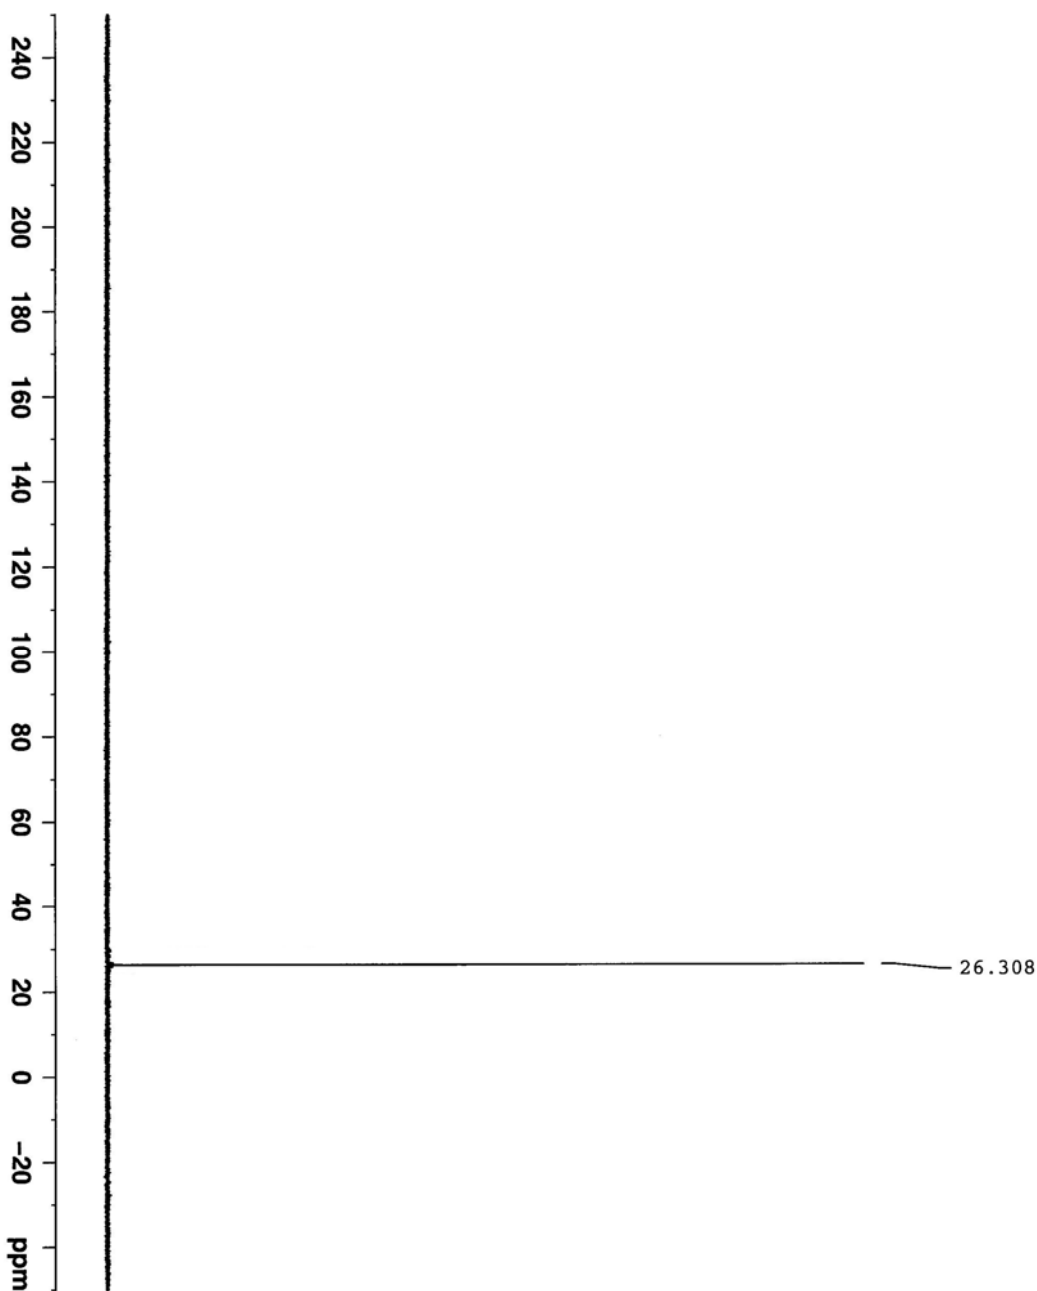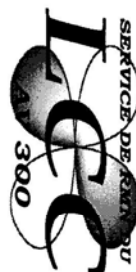

Current Data Parameters  
NAME apac0124  
EXPNO 2  
PROCNO 1  
USER majoral

F2 - Acquisition Parameters  
Date\_ 20080227  
Time 9.24

INSTRUM 5 mm TXO 31P/1  
PROBHD 1s\_zg60dc  
PULPROG 65536  
TD  
SOLVENT CDCl3  
NS 75  
DS 0

SWH 36496.352 Hz  
FIDRES 0.556890 Hz  
AQ 0.8978922 sec  
RG 32768  
DE 13.700 usec  
TE 297.9 K

D1 0.50000000 sec  
d11 0.03000000 sec  
MCREST 0.00000000 sec  
MCMRK 0.01500000 sec

===== CHANNEL f1 =====  
NUC1 31P  
P1 8.80 usec  
PL1 0.00 dB  
SFO1 121.5070005 MHz

===== CHANNEL f2 =====  
CPDPRG2 waltz16  
NUC2 1H  
PCPD2 89.00 usec  
PL2 -2.00 dB  
PL12 17.00 dB  
SFO2 300.1312005 MHz

F2 - Processing parameters  
SI 65536  
SF 121.4948510 MHz  
WDW EM  
SSB 0  
LB 1.00 Hz  
GB 0  
PC 1.00

# Compound 4a

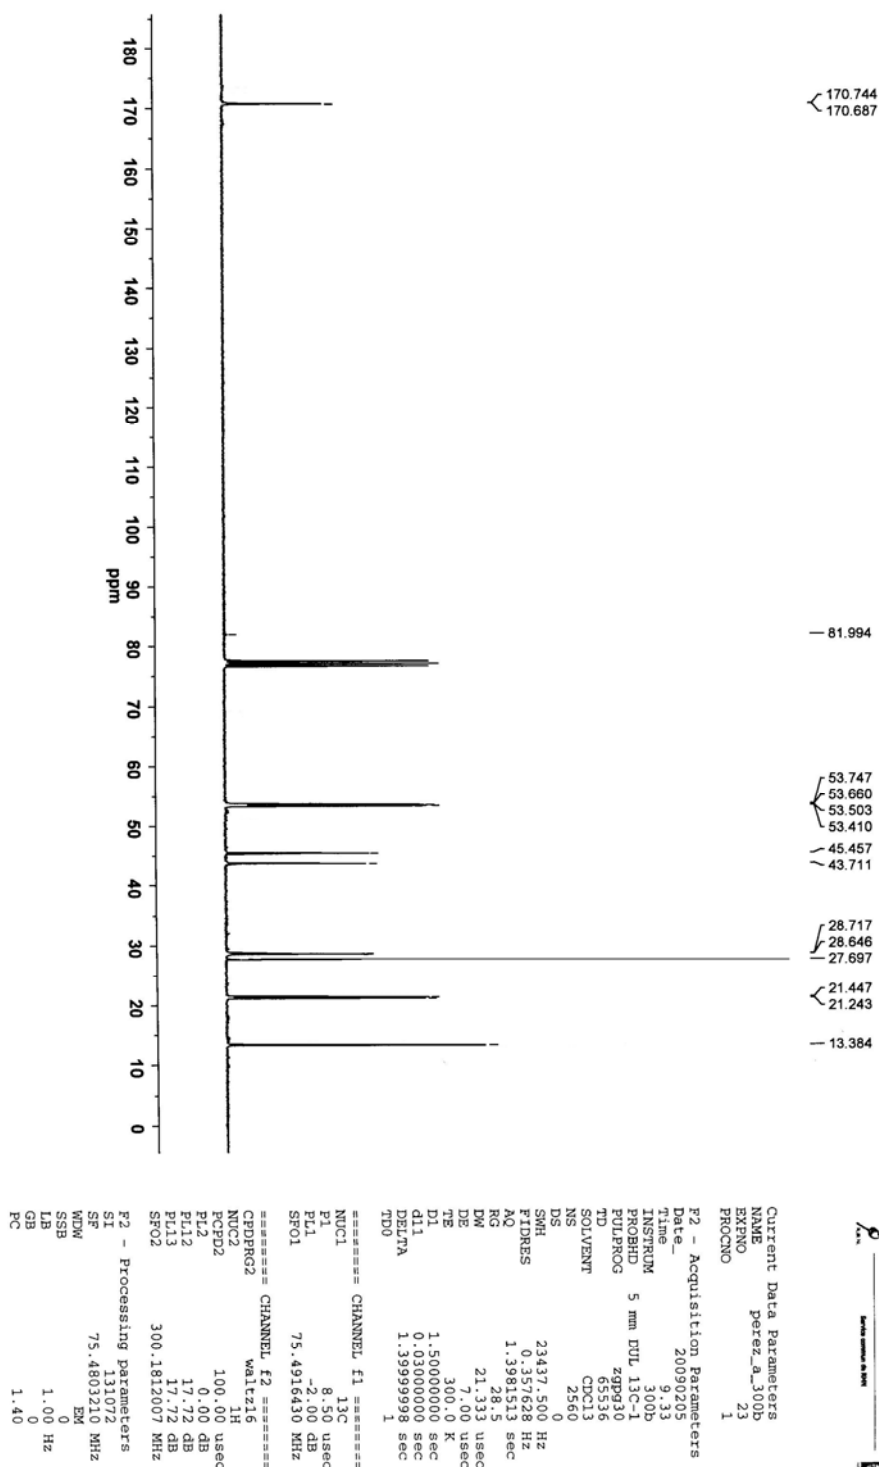

# Compound 4b

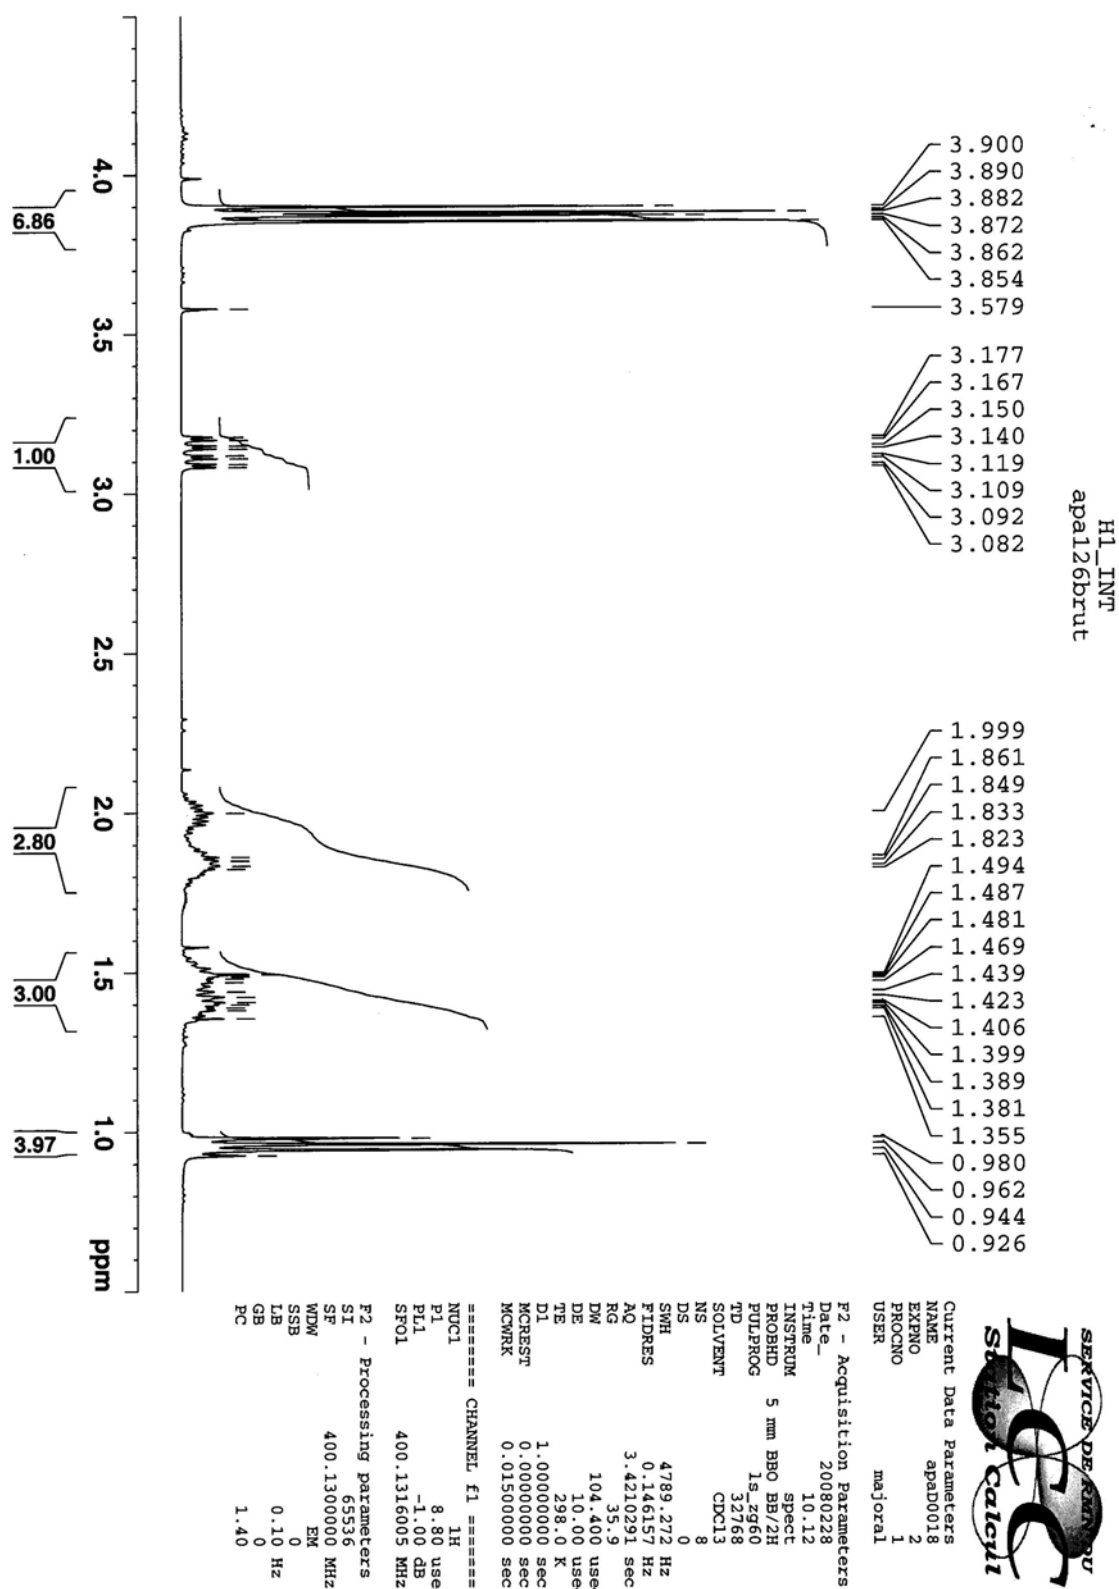

# Compound 4b

P31\_DECOUPLE\_H1  
apa126brut

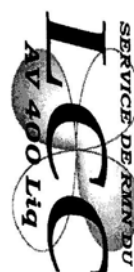

Current Data Parameters  
NAME apad0018  
EXPNO 1  
PROCNO 1  
USER majoral

F2 - Acquisition Parameters  
Date\_ 20080228  
Time 10.09  
INSTRUM spect  
PROBHD 5 mm BBO BB/2H  
PULPROG zgpg30  
TD 65536  
SOLVENT CDCl3  
NS 83  
DS 0  
SWH 48661.801 Hz  
FIDRES 0.742520 Hz  
AQ 0.6734324 sec  
RG 13004  
DW 10.275 usec  
DE 10.00 usec  
TE 298.0 K  
D1 0.50000000 sec  
d11 0.03000000 sec  
MCREST 0.00000000 sec  
MCMRK 0.01500000 sec

===== CHANNEL f1 =====  
NUC1 31P  
P1 8.40 usec  
PL1 0.00 dB  
SFO1 161.9917906 MHz

===== CHANNEL f2 =====  
CPDPRG2 waltz16  
NUC2 1H  
PCPD2 90.00 usec  
PL2 -1.00 dB  
PL12 19.20 dB  
SFO2 400.1318006 MHz

F2 - Processing parameters  
SI 131072  
SF 161.975930 MHz  
WDW EM  
SSB 0  
LB 1.00 Hz  
GB 0  
PC 1.40

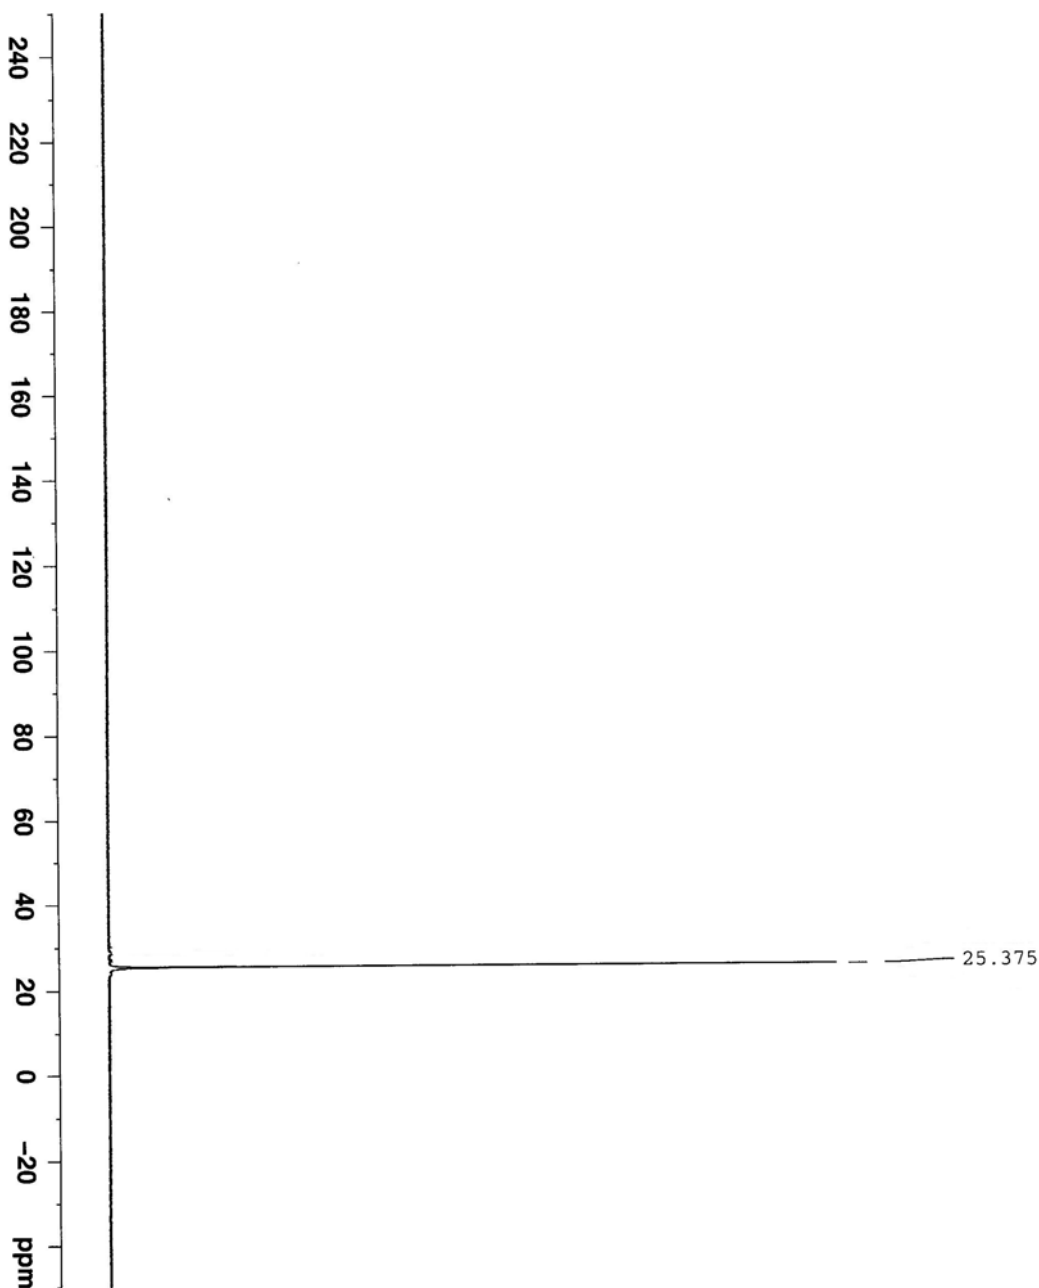

# Compound4b

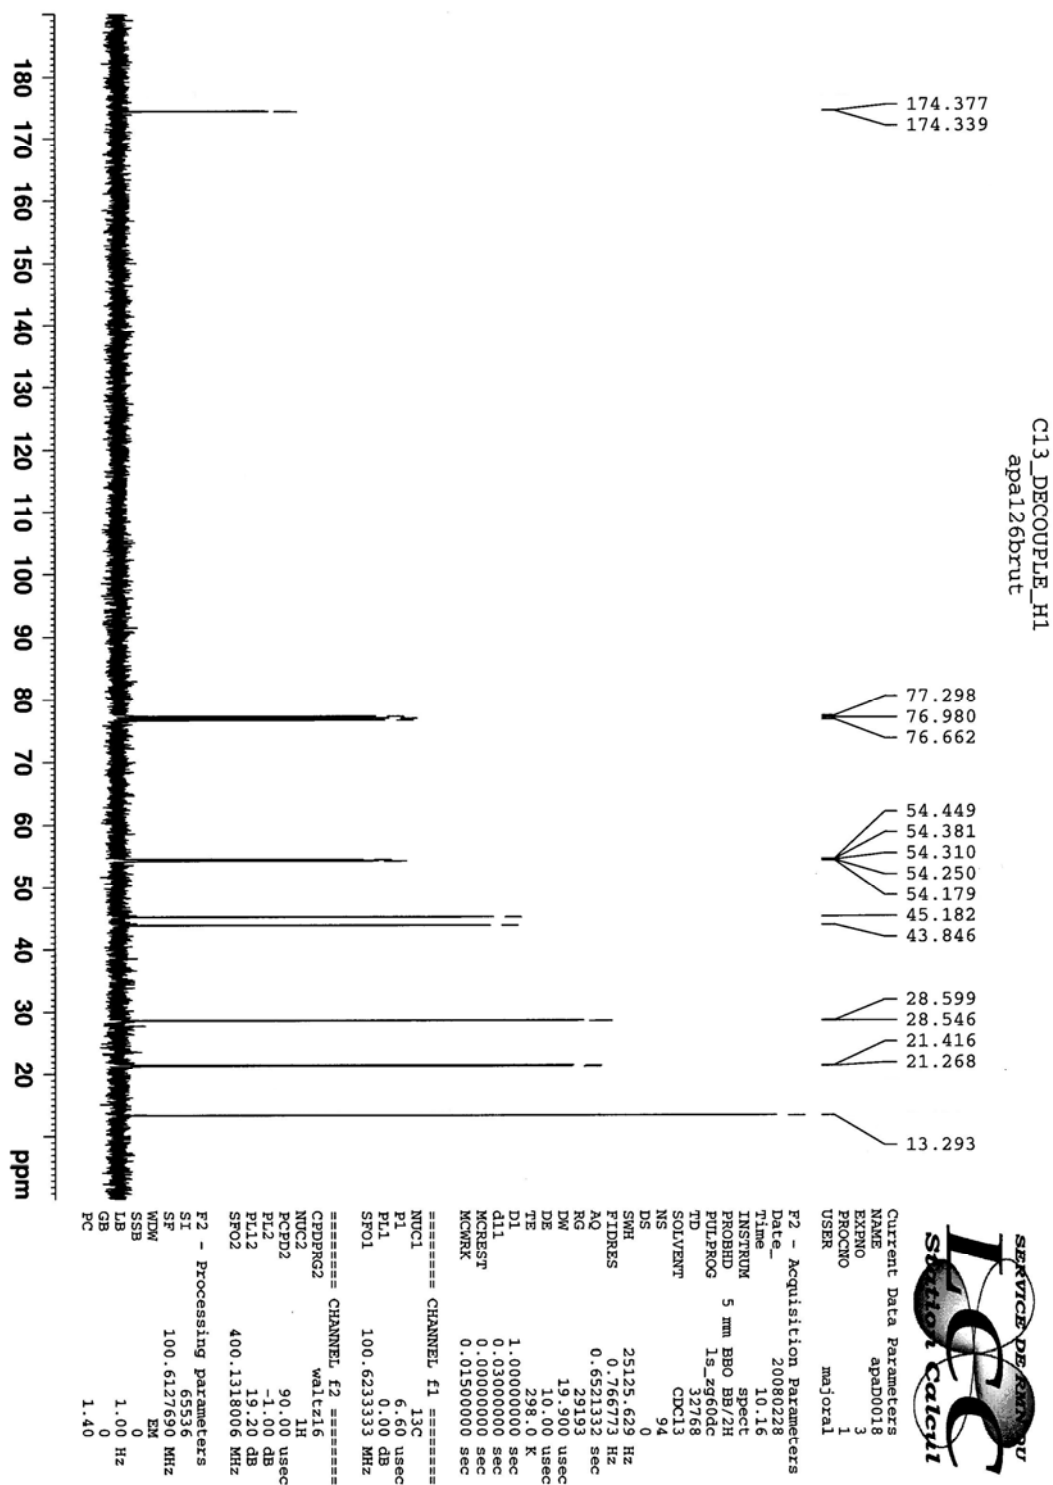



# Compound 5

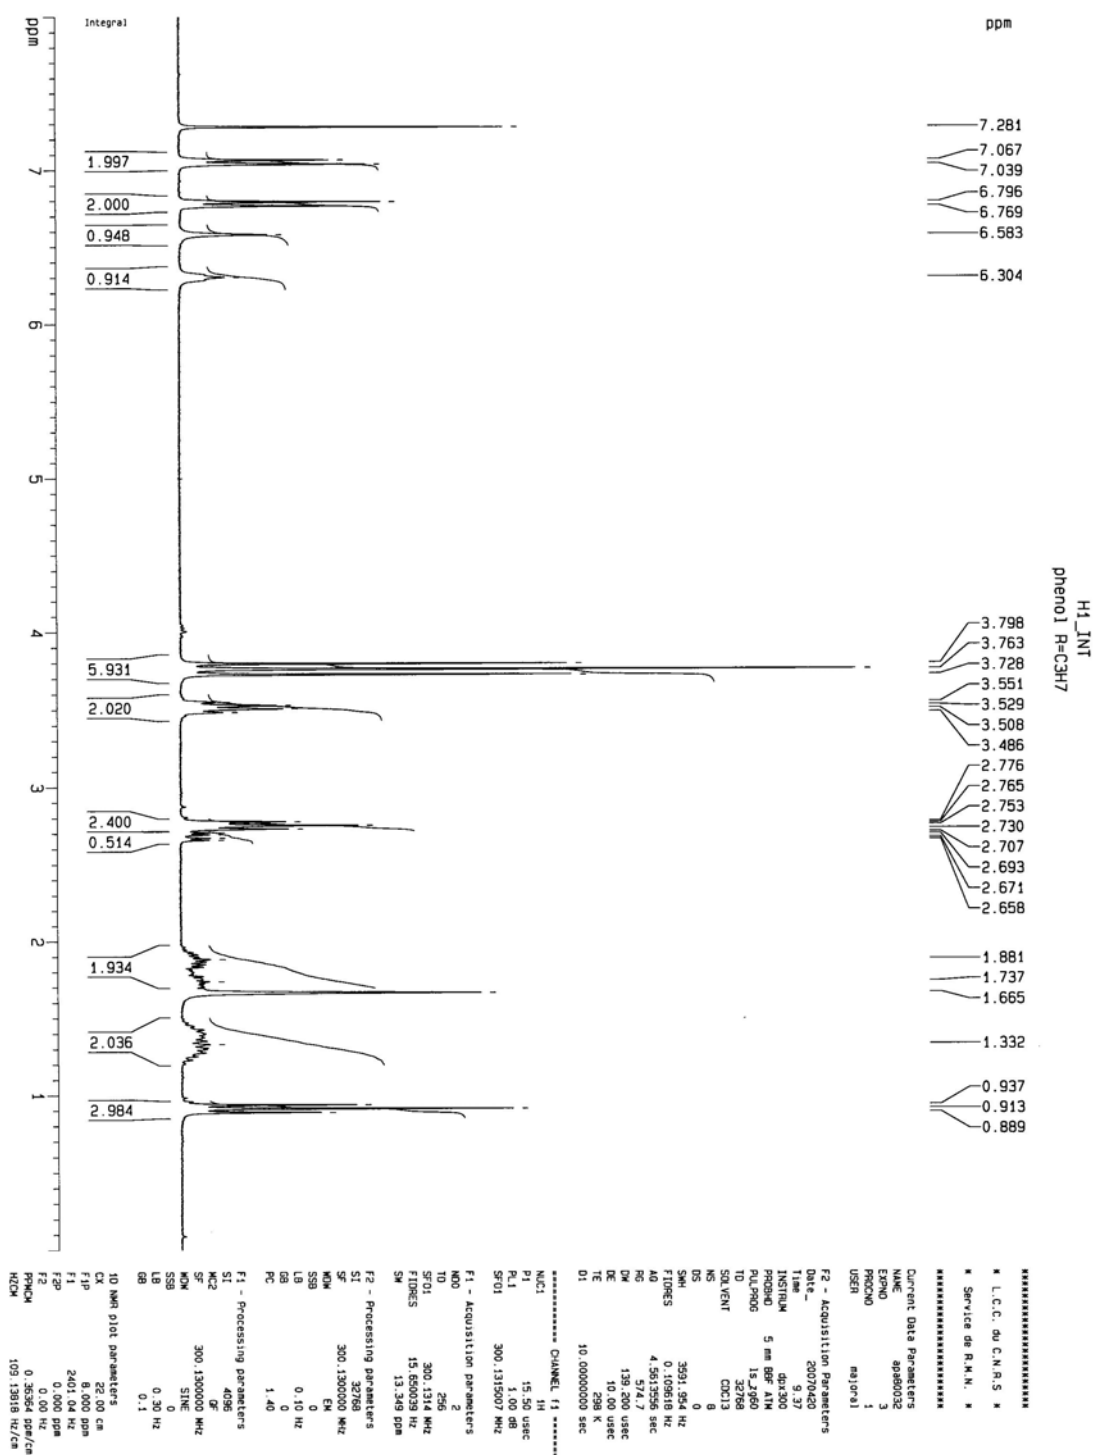

# Compound 5

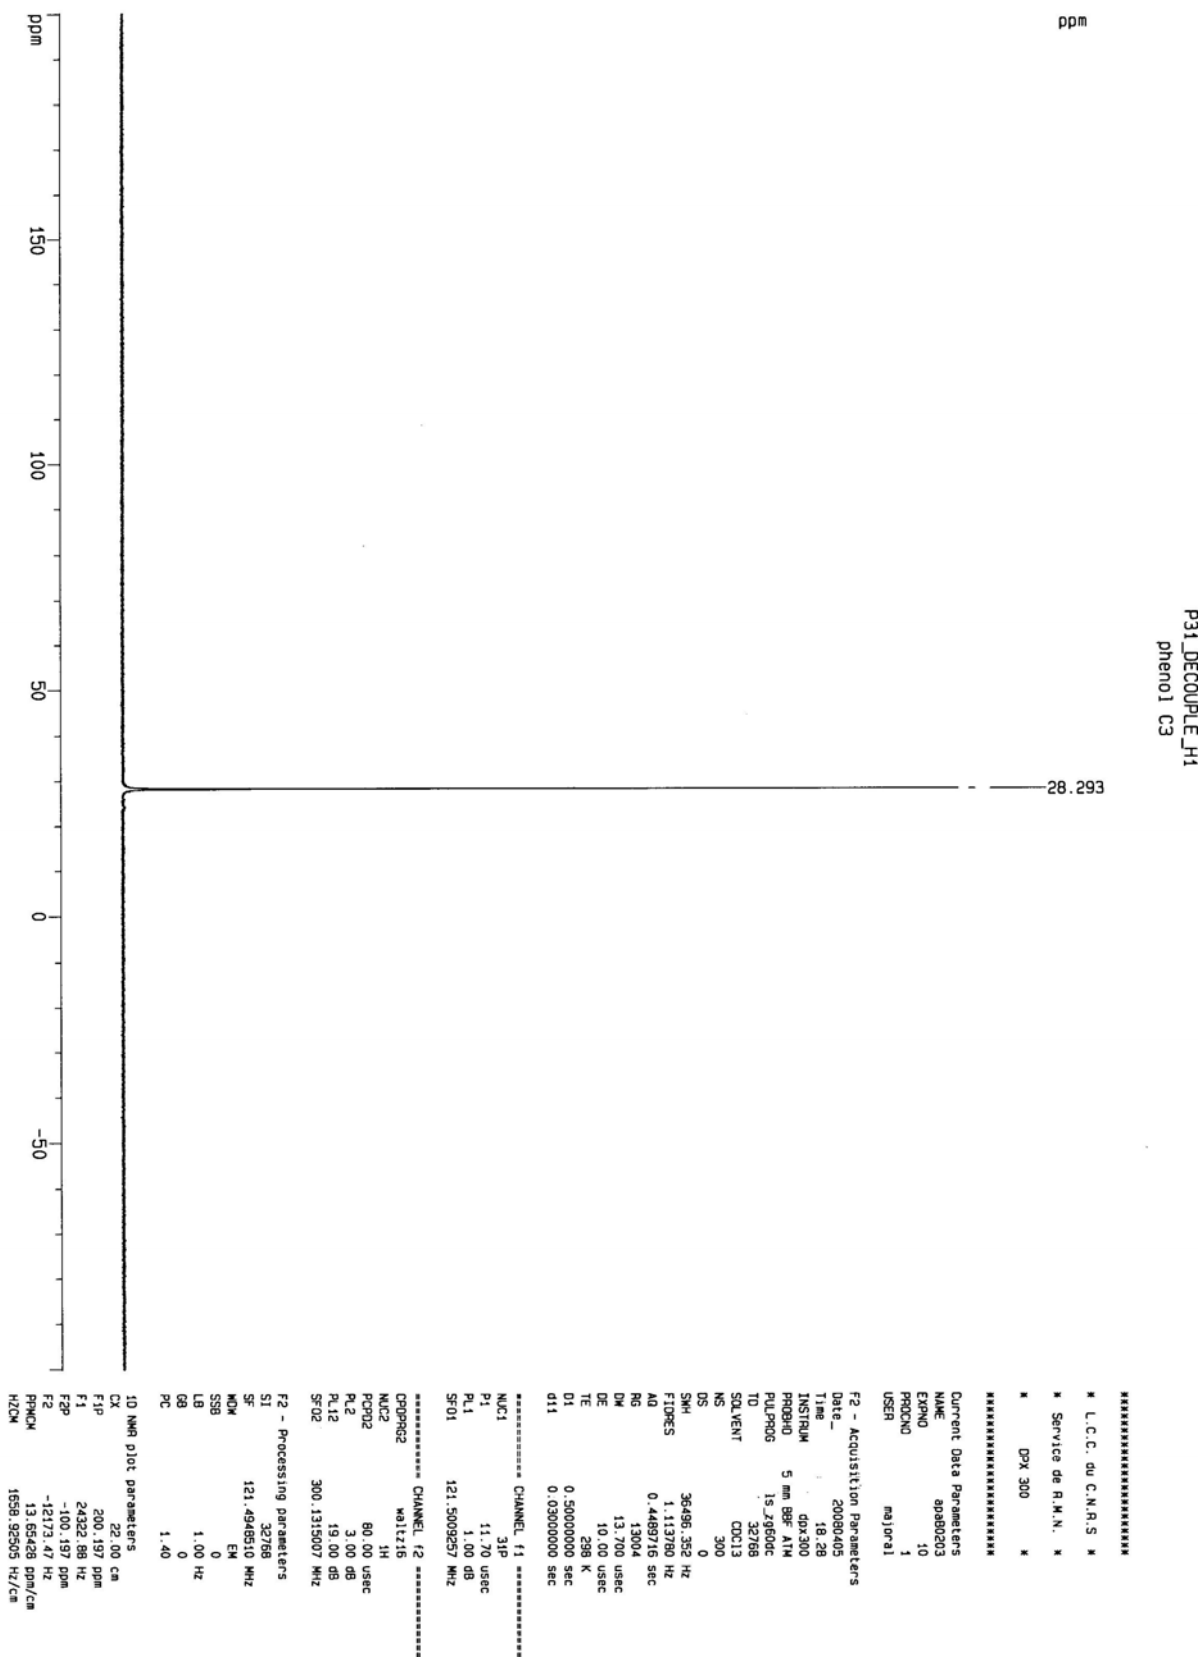

# Compound 5

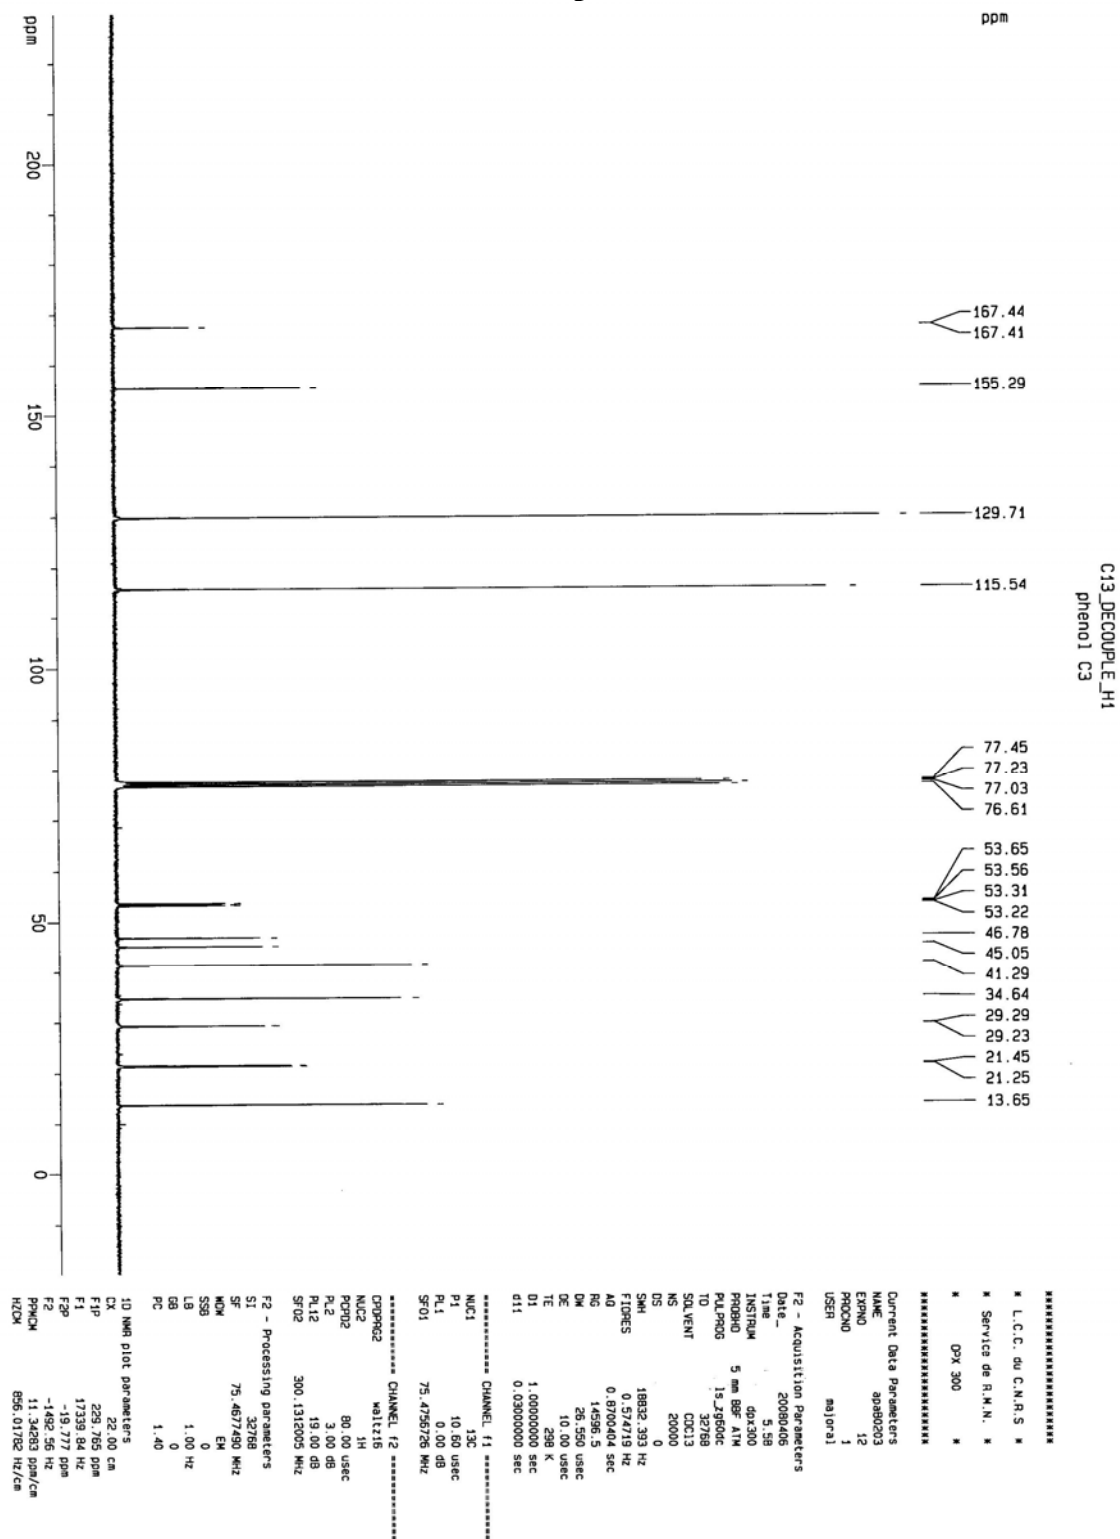

# Compound 5

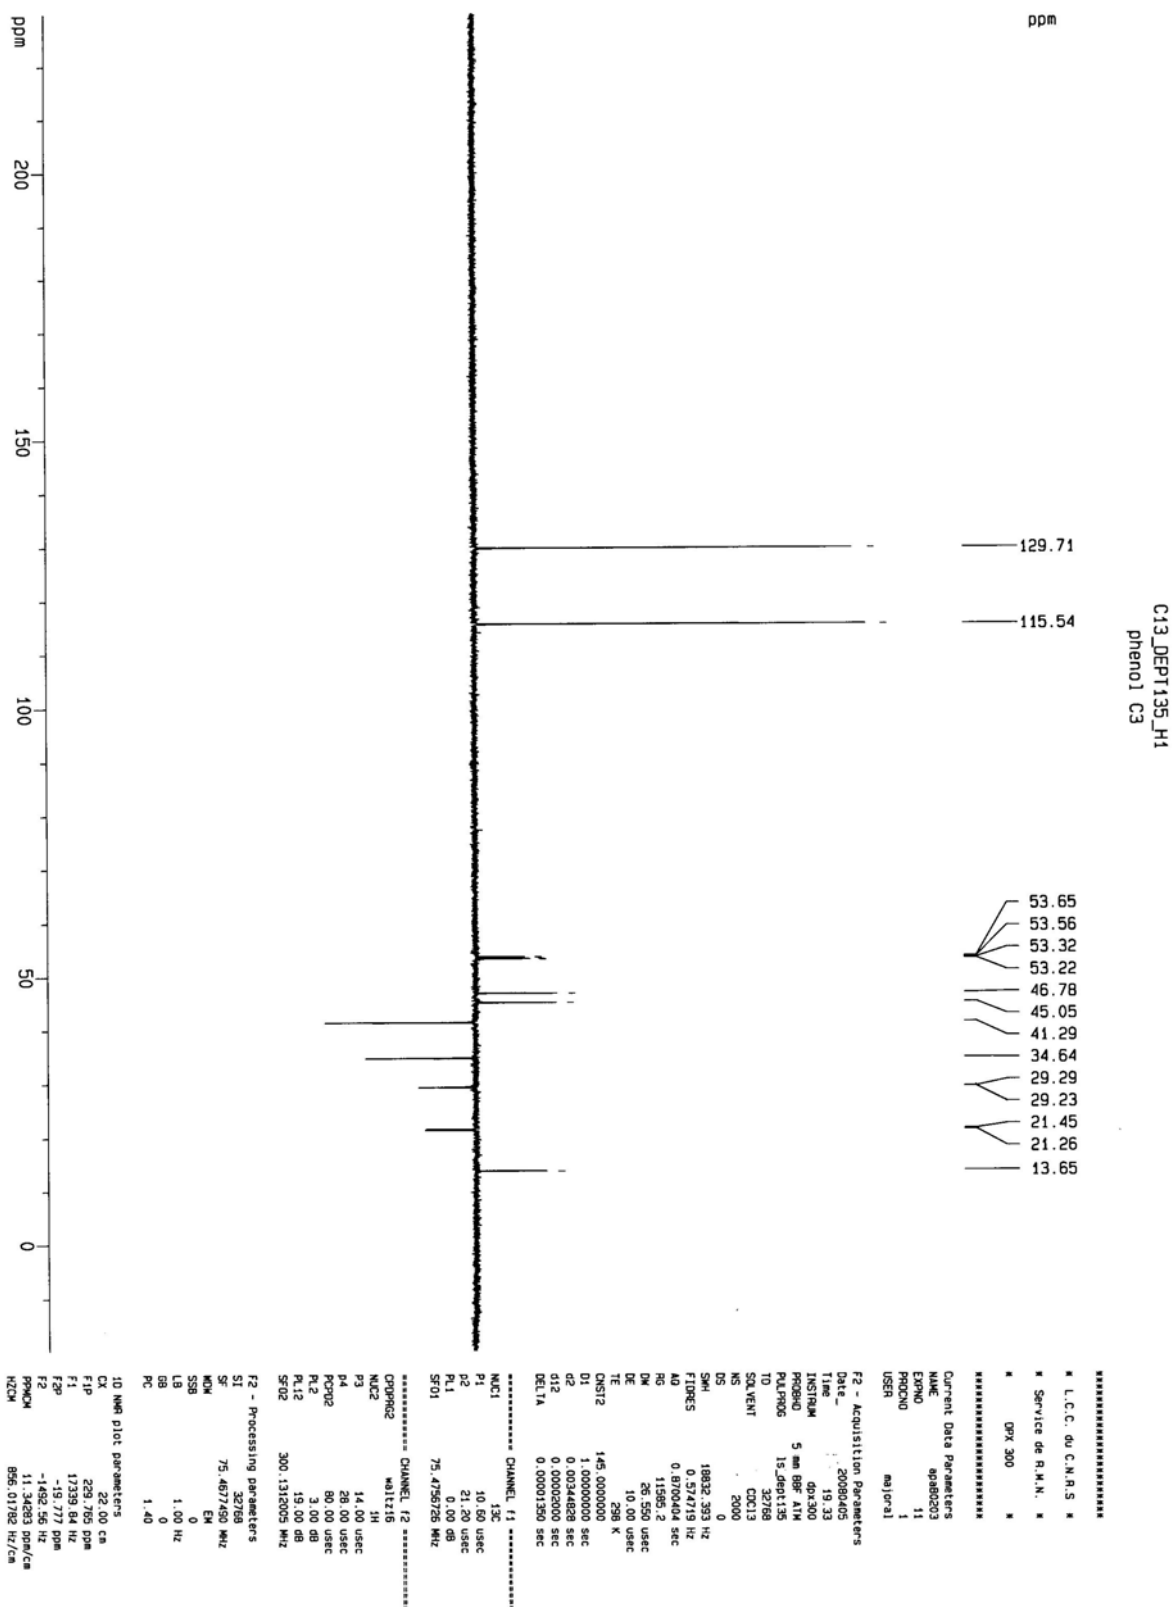

# Compound 5a-Gc'1

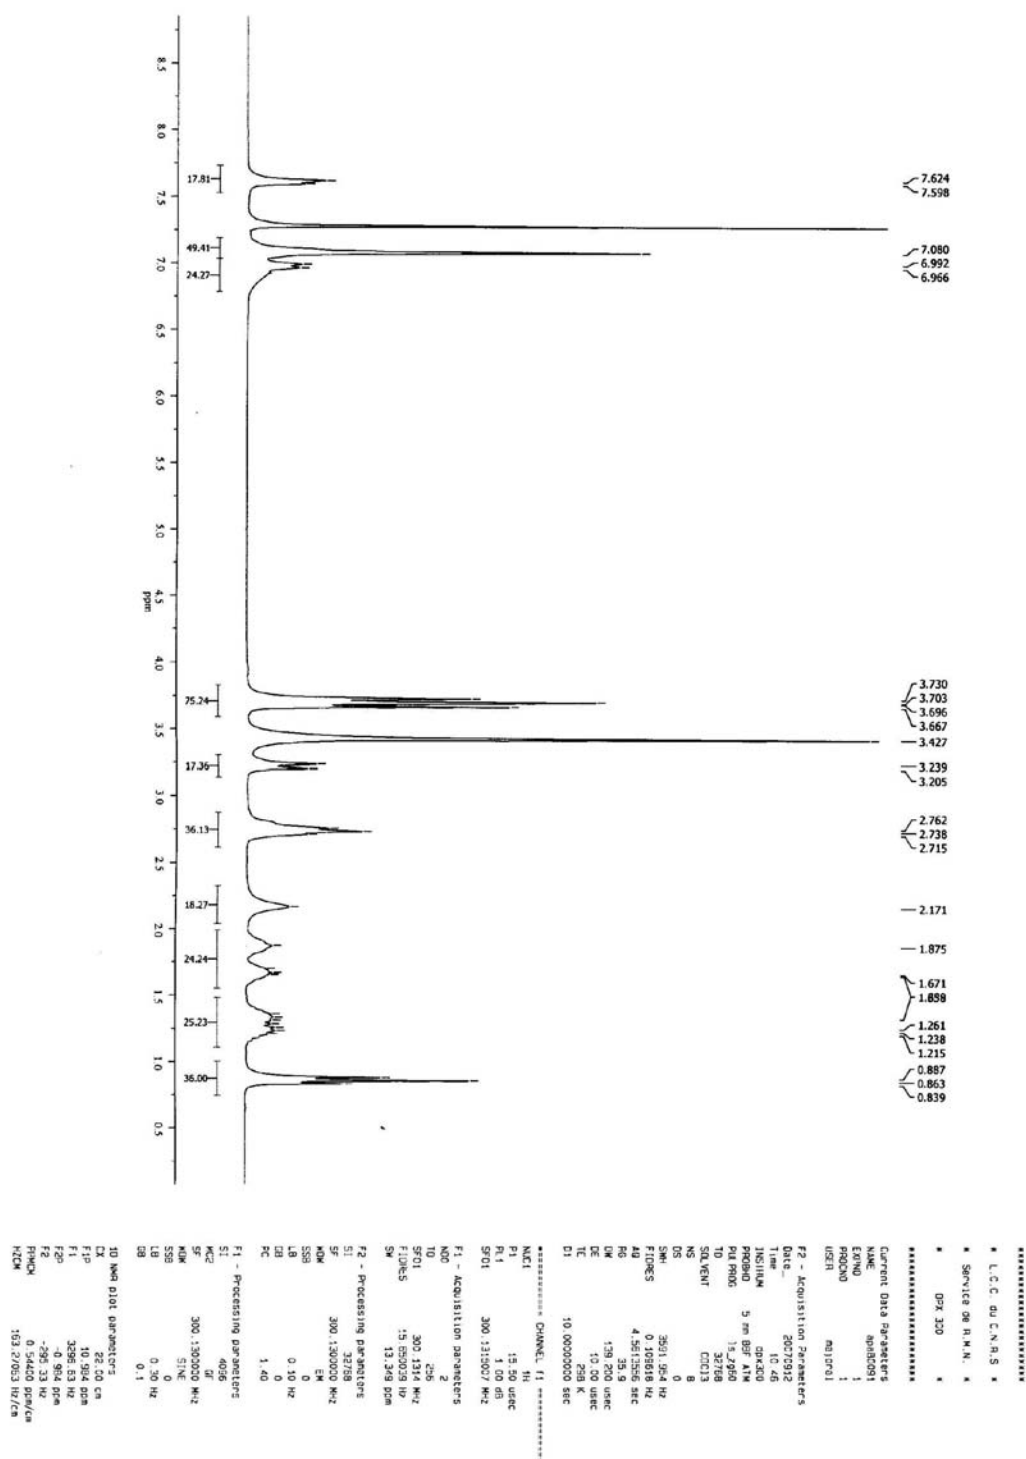

# Compound 5a-Gc'<sub>1</sub>

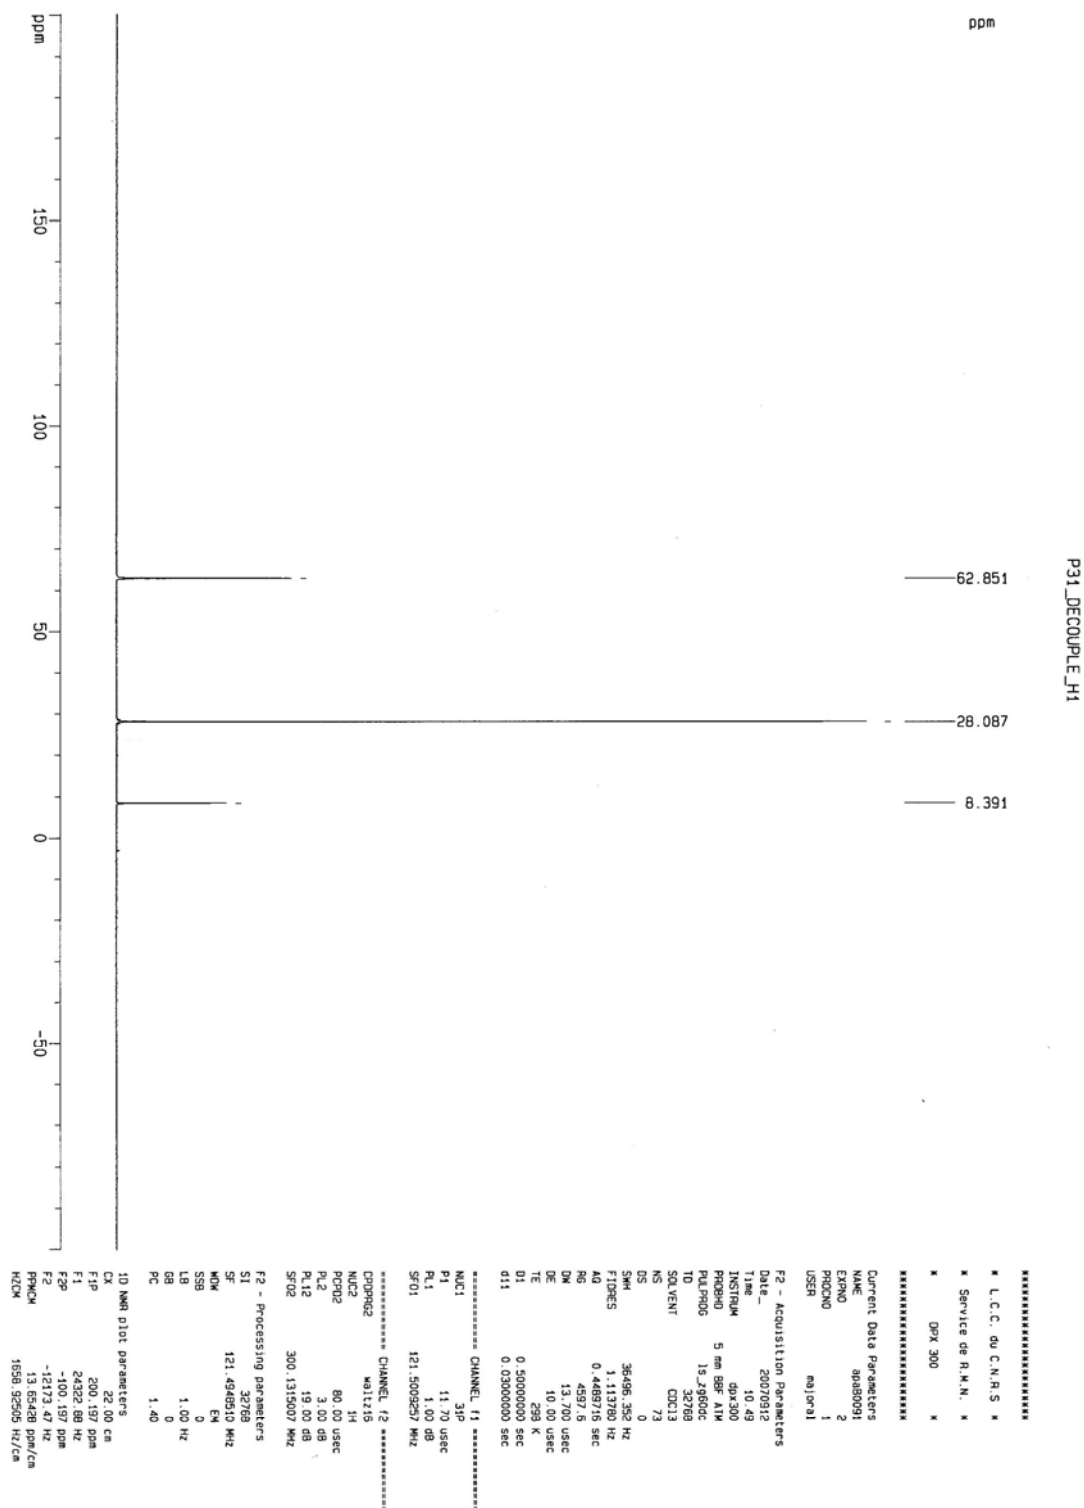

# Compound 5a-Gc'1

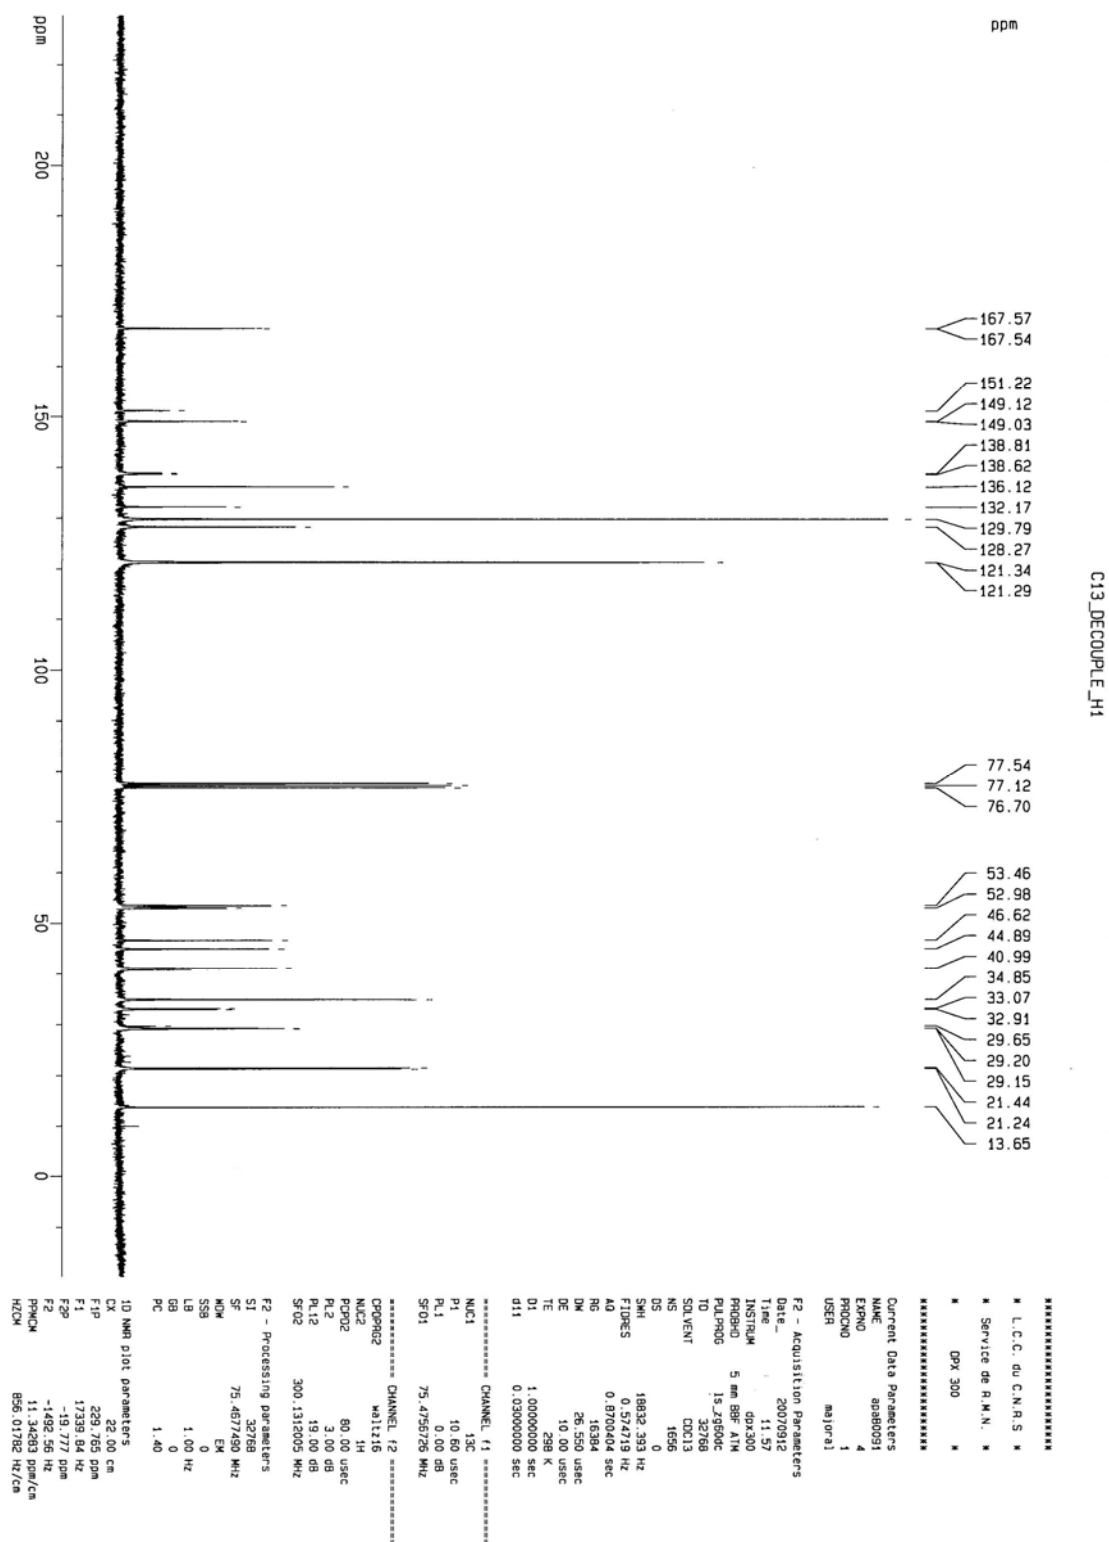

# Compound 5a-Gc'1

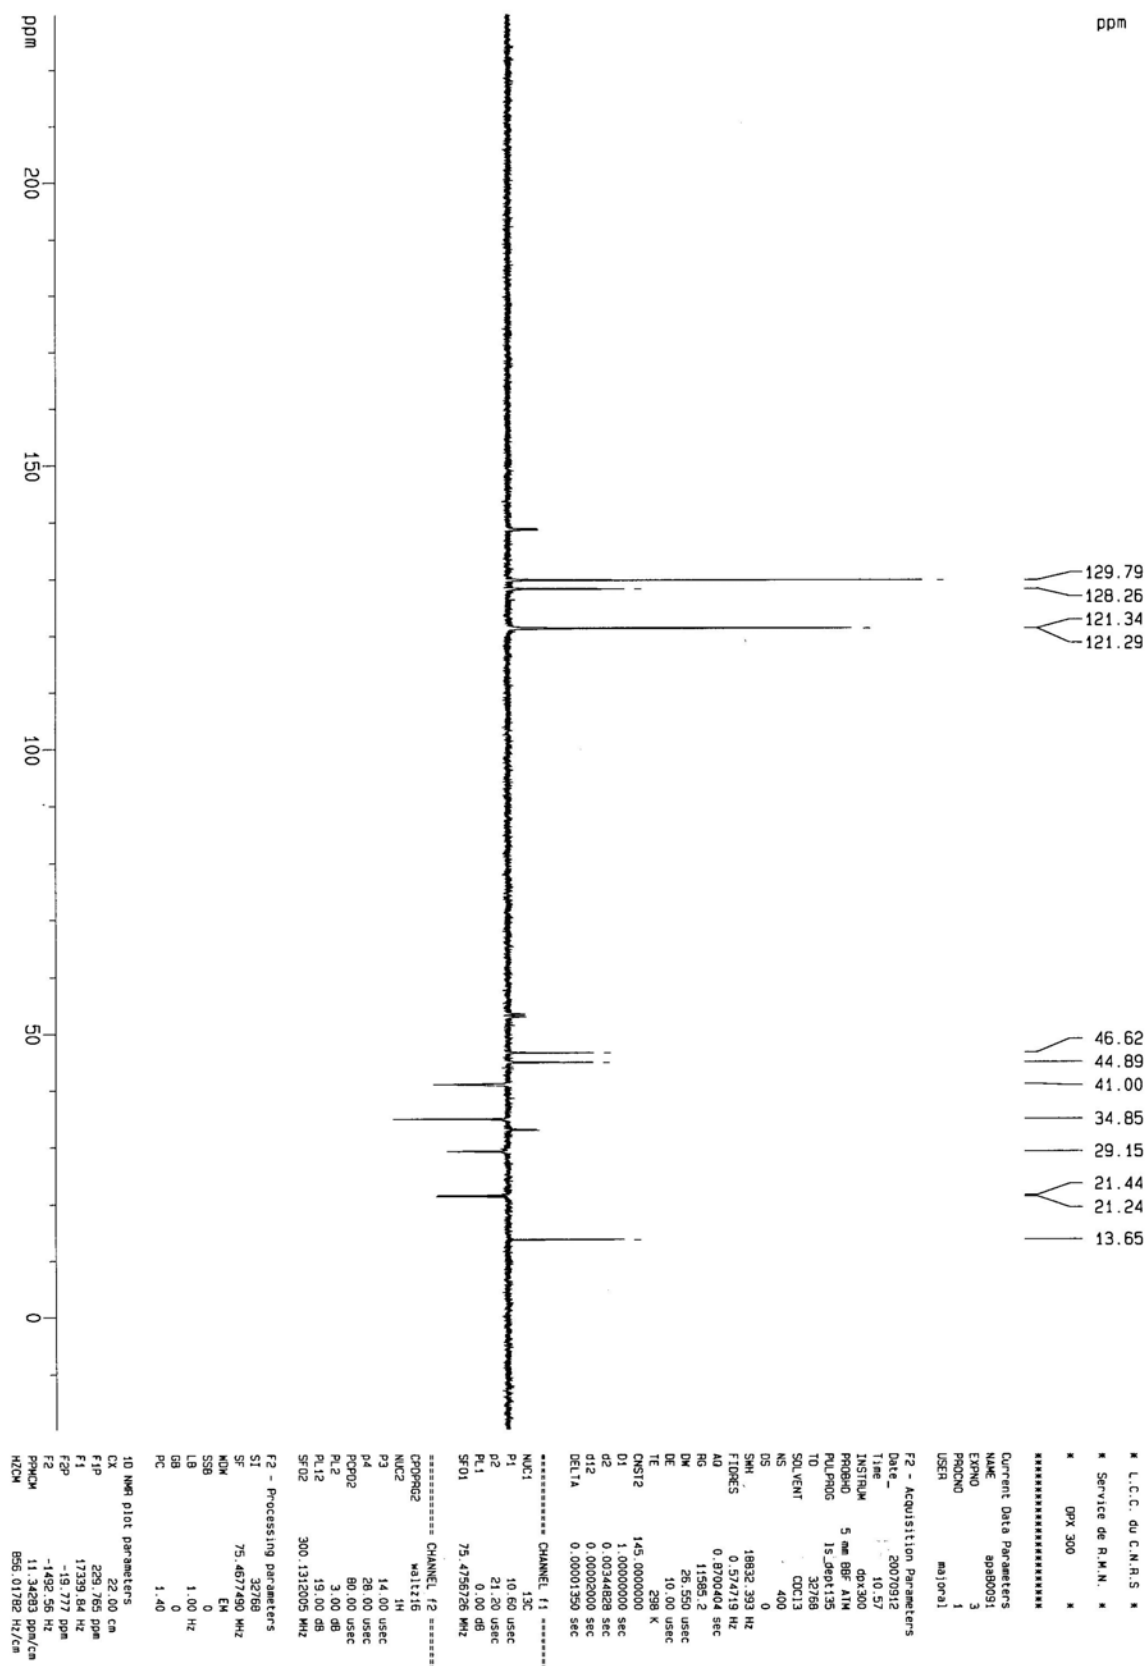



# Compound 5b-Gc'<sub>1</sub>

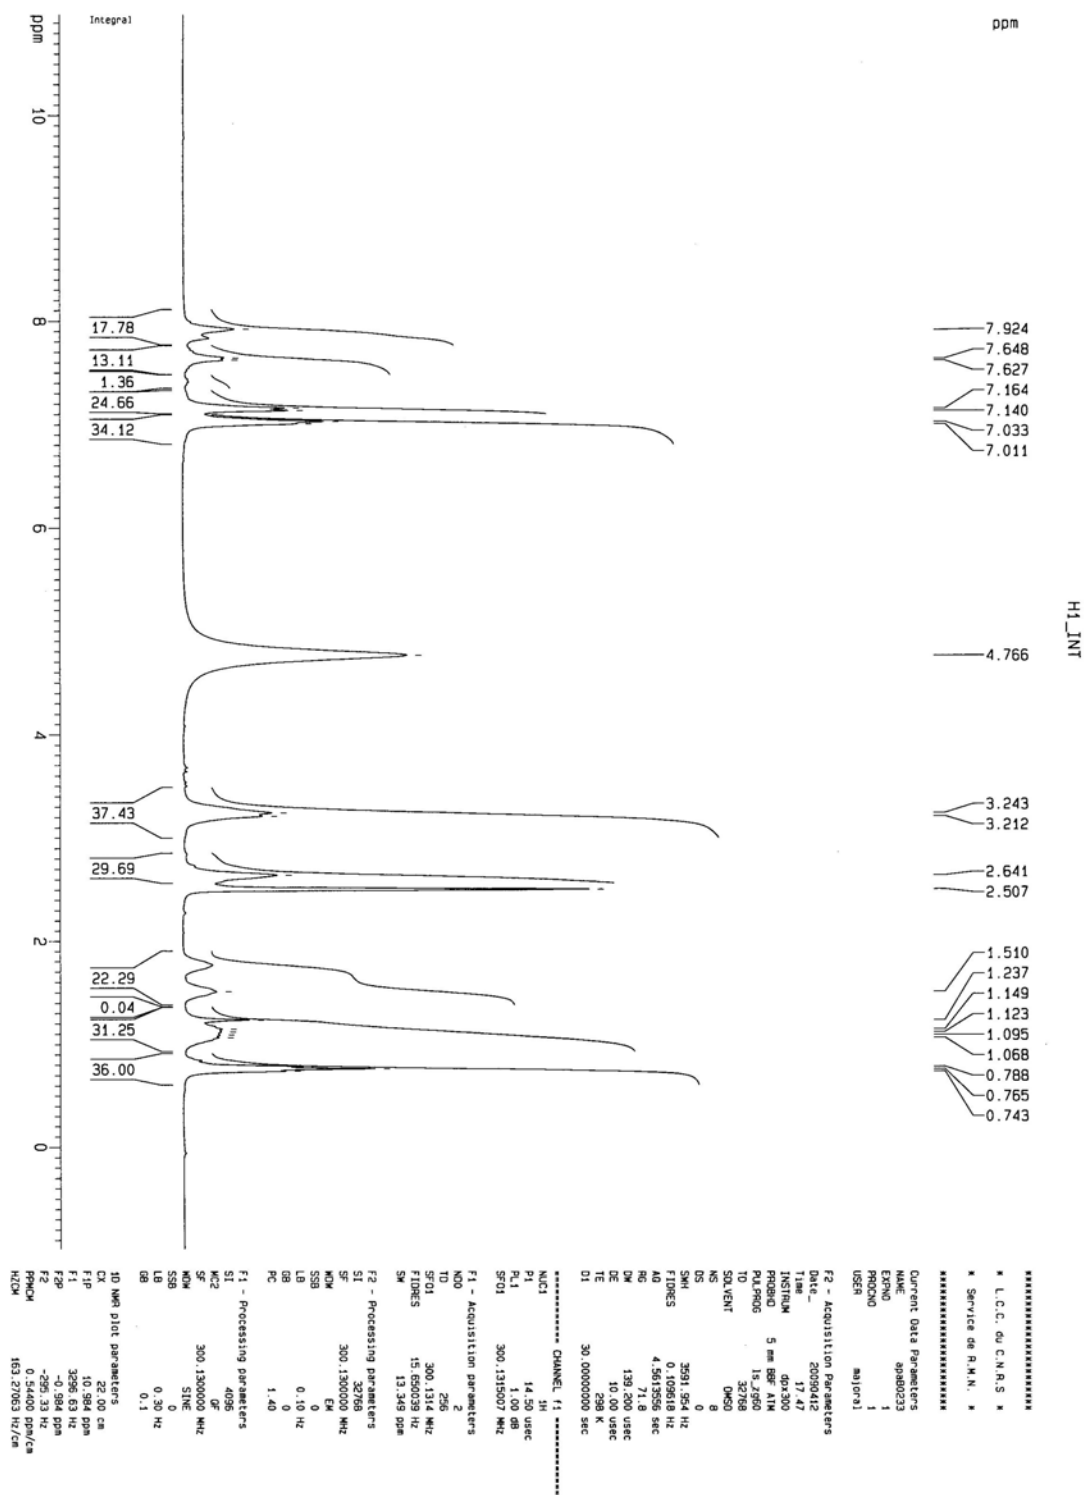

# Compound 5b-Gc'<sub>1</sub>

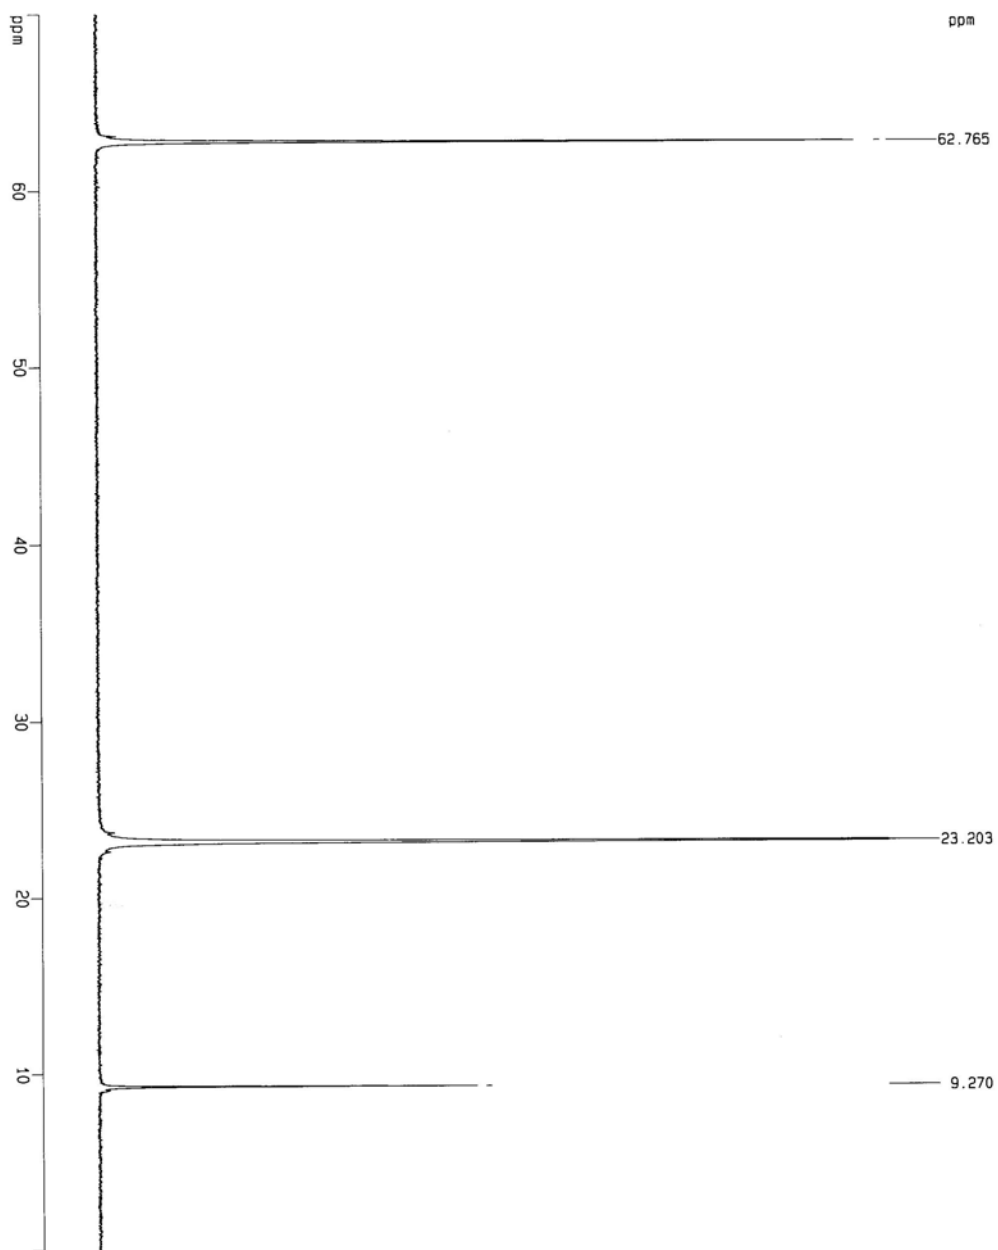

P31\_DECUPLE\_H1  
apa70

```

*****
* L.C.C. du C.N.R.S. *
* Service de R.M.N. *
*****

Current Data Parameters
NAME      apas063
EXPNO     2
PROCNO    1
USER      majoral

F2 - Acquisition Parameters
Date_     20070623
Time      14.38
INSTRUM   gp300
PROBHD    5 mm BBO ATN
PULPROG   zgpg30
TO        32763
SOLVENT   MEOH
NS         227
DS         0
SMH        36455.352 Hz
FIDRES     1.11770 Hz
AQ          0.4489715 sec
RG          9195.2
OW         13.700 usec
DE         10.00 usec
TE         298 K
D1          0.50000000 sec
d11         0.03000000 sec

***** CHANNEL f1 *****
NUC1       31P
P1         11.70 usec
PL1        0.00 dB
SFO1       121.5009267 MHz

***** CHANNEL f2 *****
CPDPRG2    waltz16
NUC2        1H
PCPD2       80.00 usec
PL2         3.00 dB
PL12        19.00 dB
SFO2       300.1315067 MHz

F2 - Processing parameters
SI          32768
SF         121.4948510 MHz
WDW         EM
SSB         0
LB          1.00 Hz
GB          0
PC          1.40

10 NMR plot parameters
CX          22.00 cm
F1P         70.000 ppm
F1          8504.64 Hz
F2P         0.000 ppm
F2          0.00 Hz
PRGCM       3.18182 ppm/cm
HZCM        386.57452 Hz/cm
  
```

# Compound 5b-Gc'1

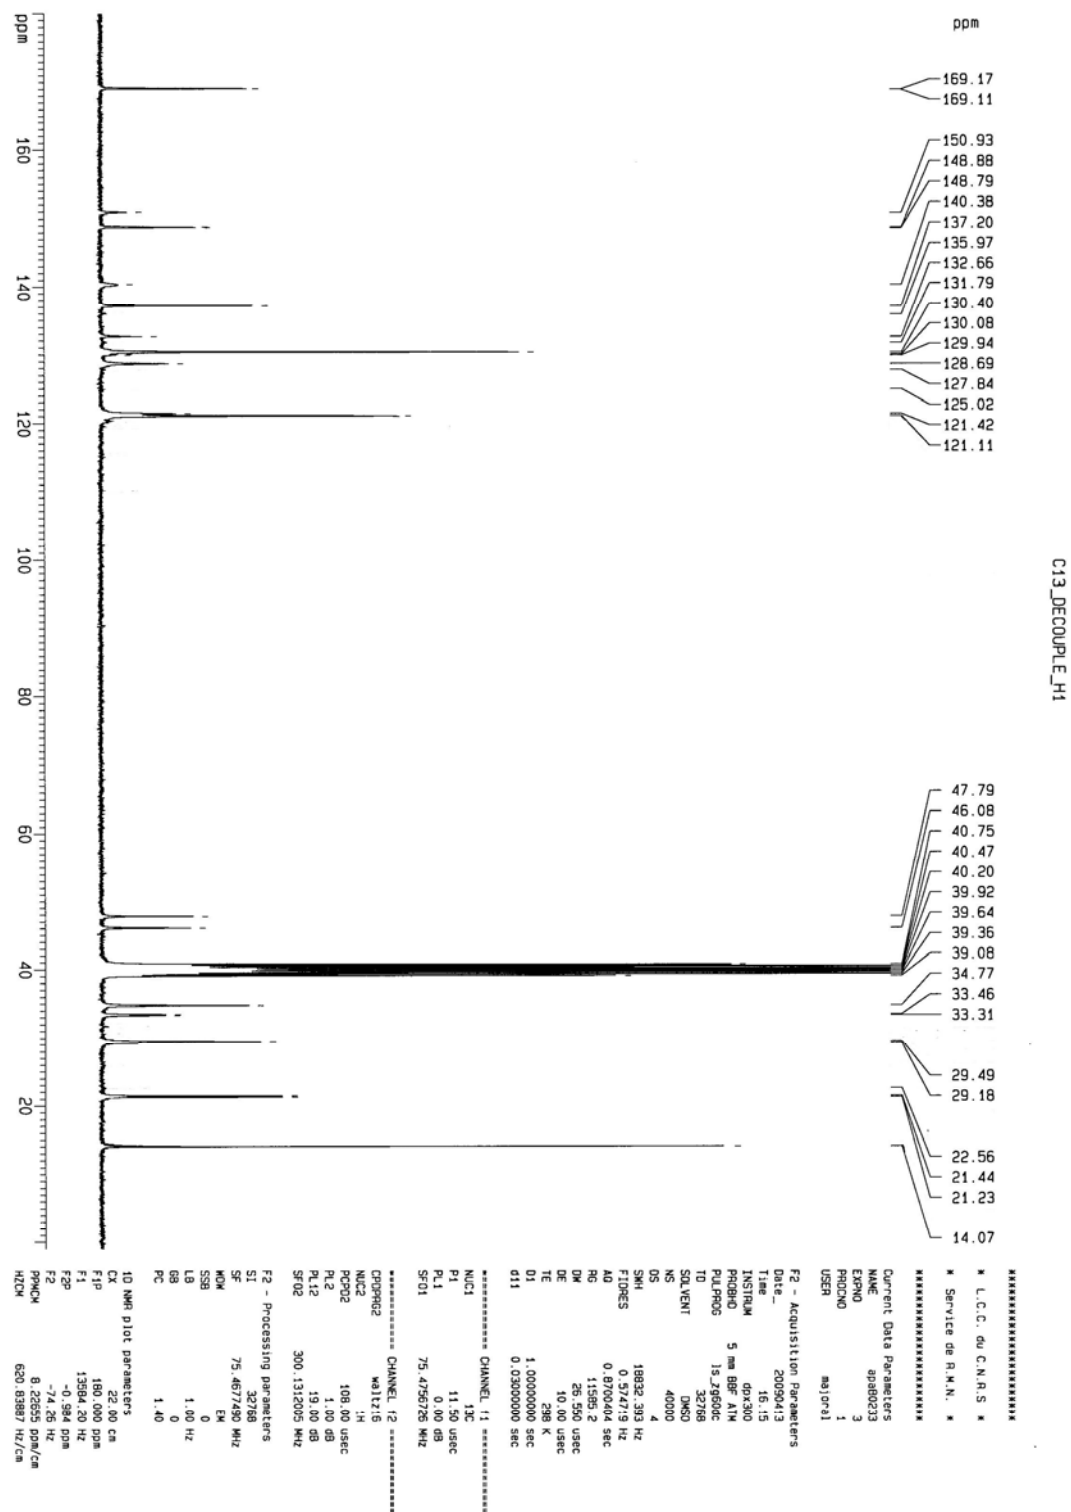

# Compound 5c-Gc'1

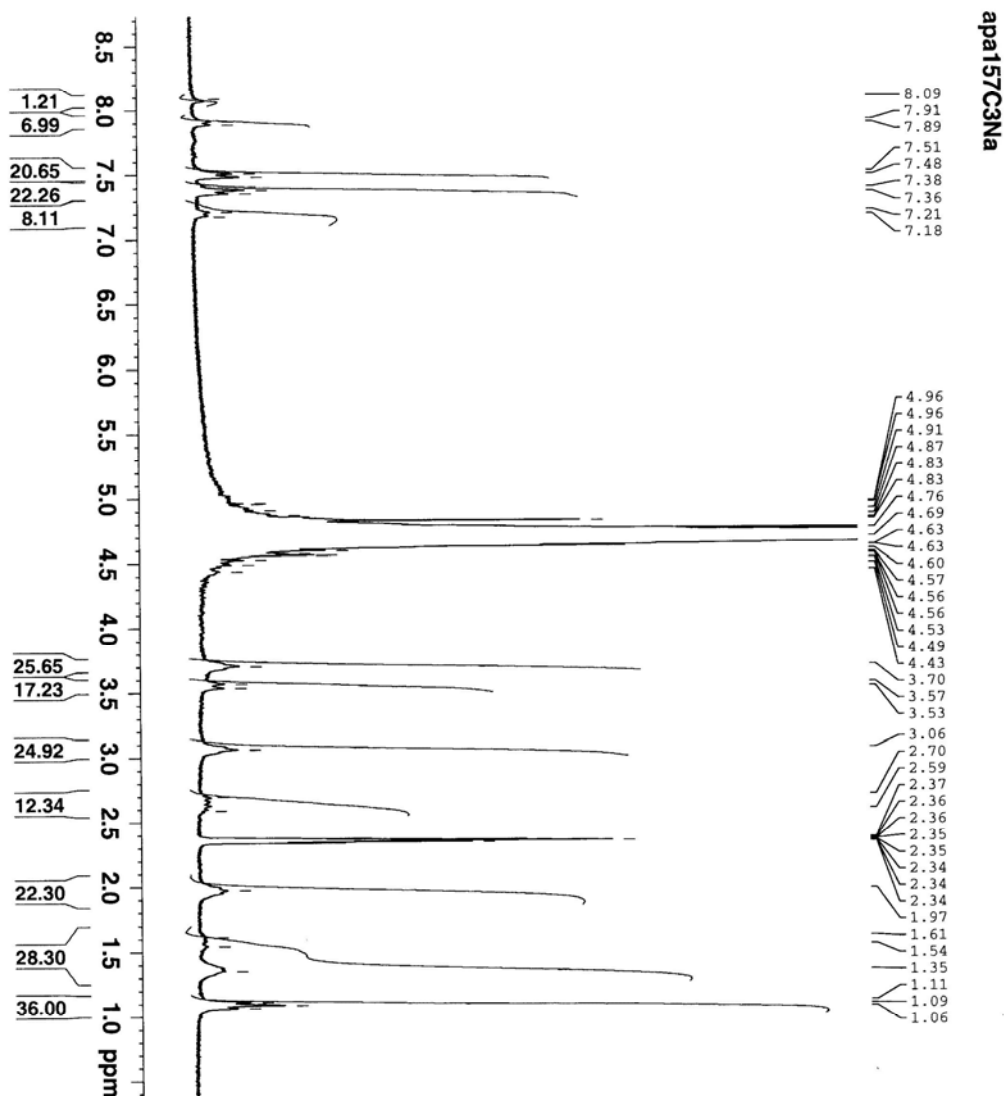

Current Data Parameters  
NAME Perez\_a\_300c  
EXNO 72  
PROCNO 1

F2 - Acquisition Parameters  
Date\_ 20080624  
Time 10:58  
INSTRUM spect  
PROBHD 5 mm PABBO BB-  
PULPROG zg30  
TD 65536  
SOLVENT D2O  
NS 16  
DS 0  
SWH 6188.119 Hz  
FIDRES 0.094423 Hz  
AQ 5.295287 sec  
RG 328  
RG 80.800 usec  
DE 10.800 usec  
TE 298.0 K  
D1 1.00000000 sec  
TD0 1

==== CHANNEL f1 =====  
NUC1 1H  
P1 11.50 usec  
PL1 -1.00 dB  
SFO1 300.1318530 MHz

F2 - Processing parameters  
SI 131072  
SF 300.1300000 MHz  
WDW EM  
SSB 0  
LB 0.15 Hz  
GB 0  
PC 1.00

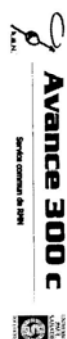

# Compound 5c-Gc'1

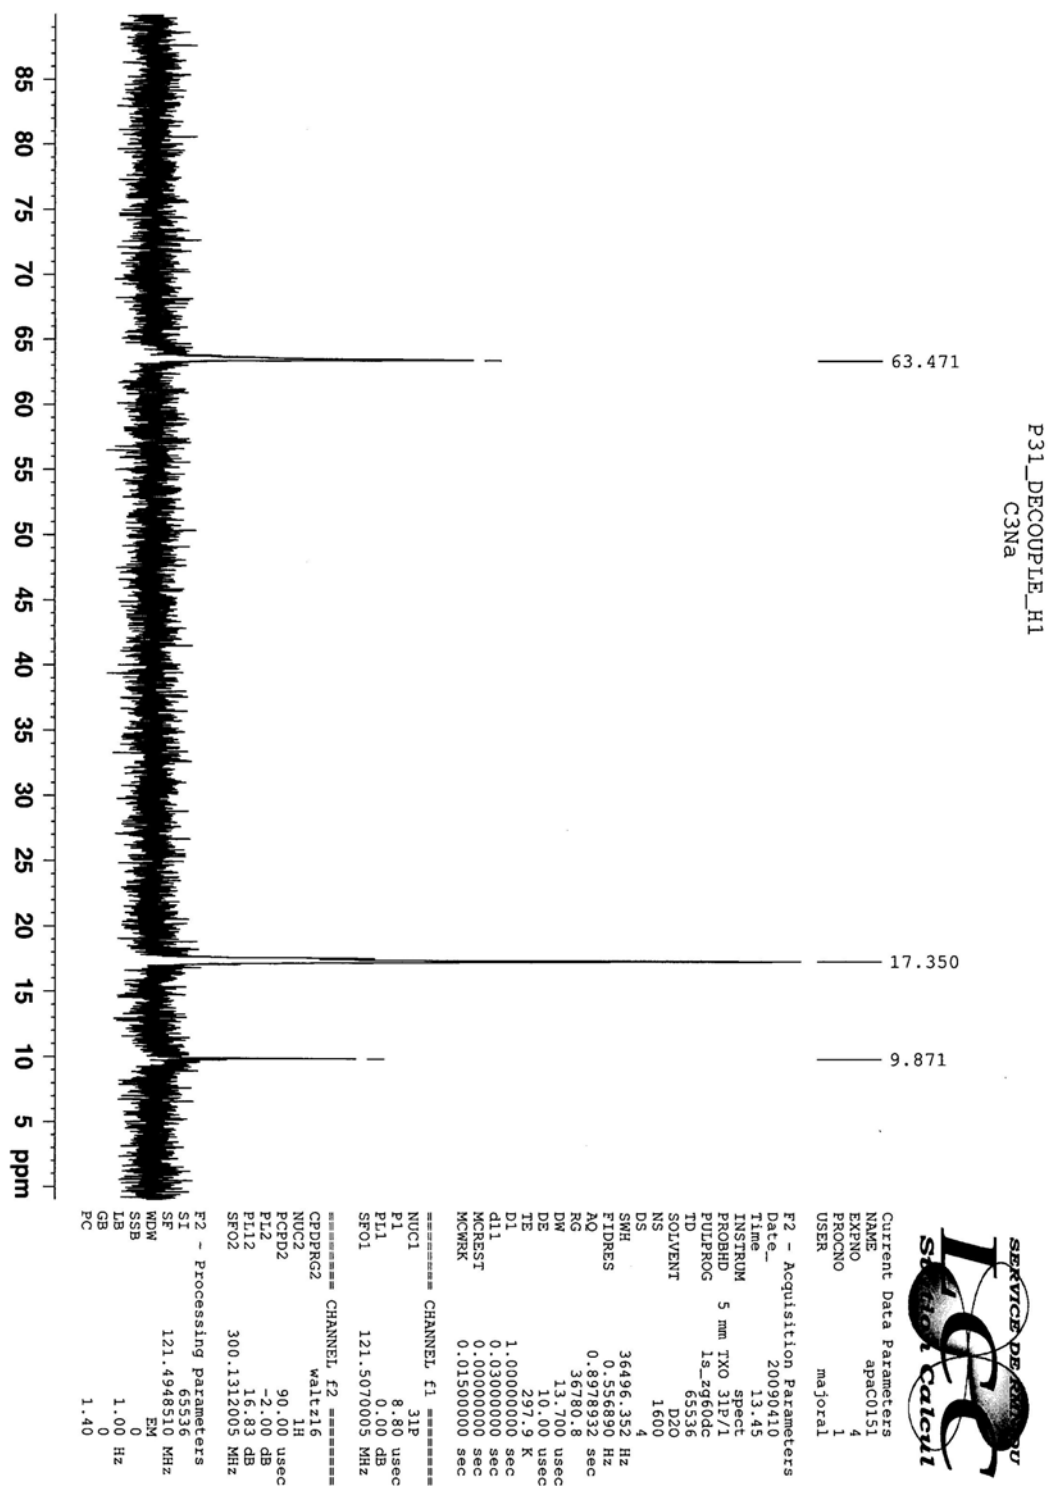

# Compound 5c-Gc'1

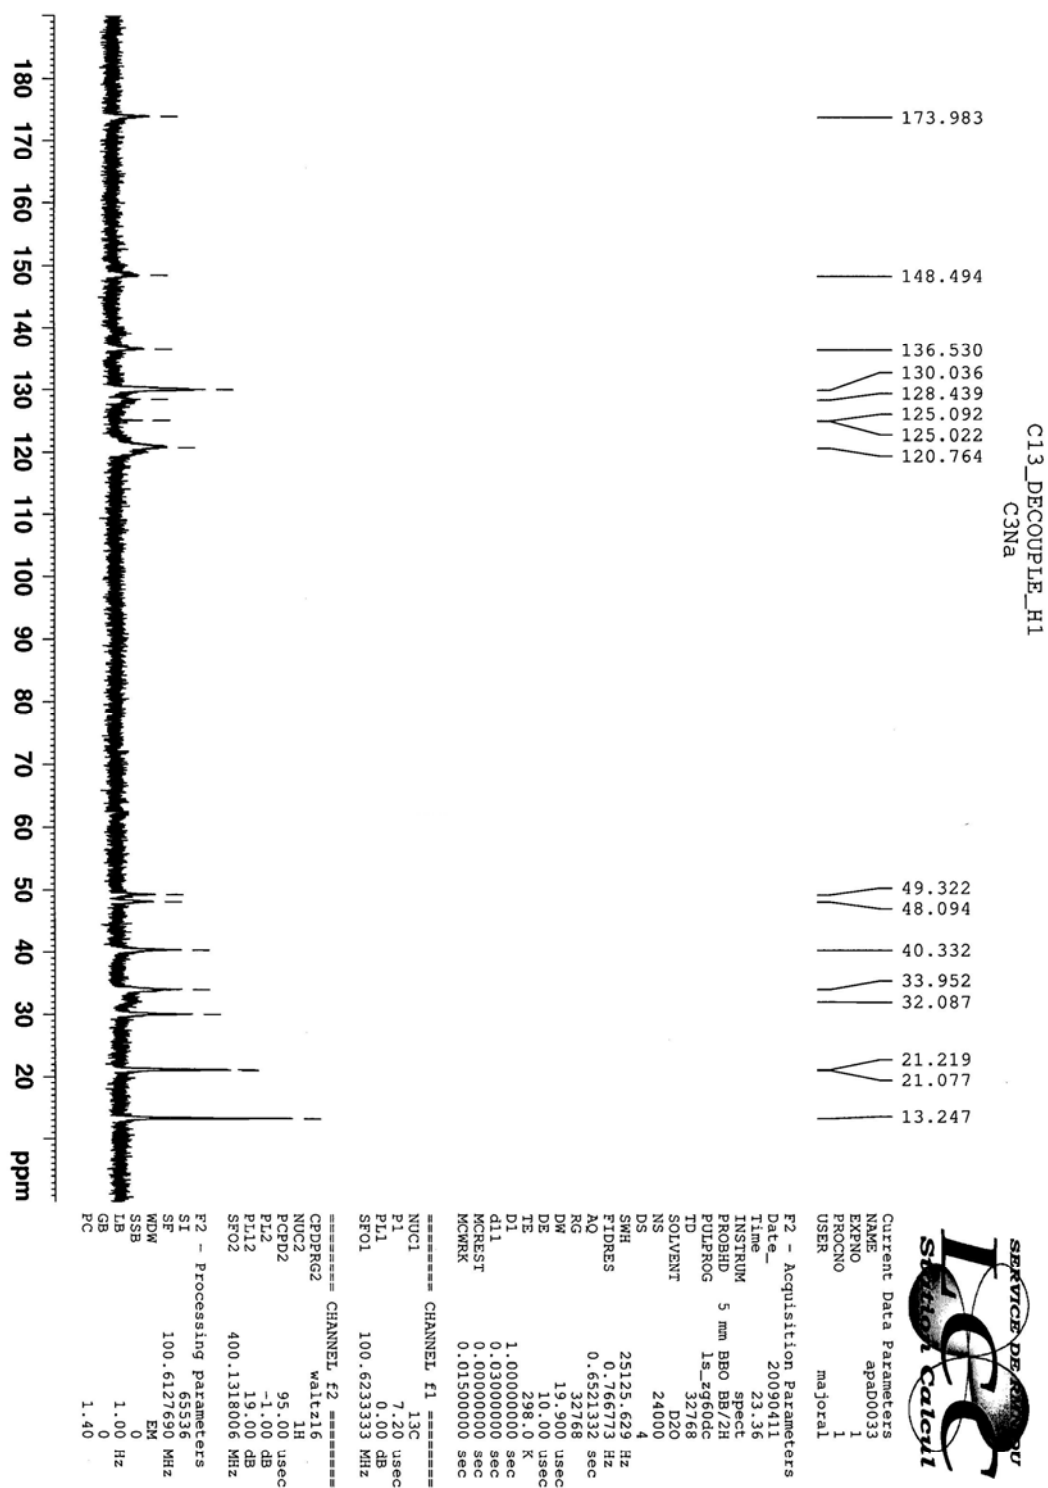

# Compound 6a

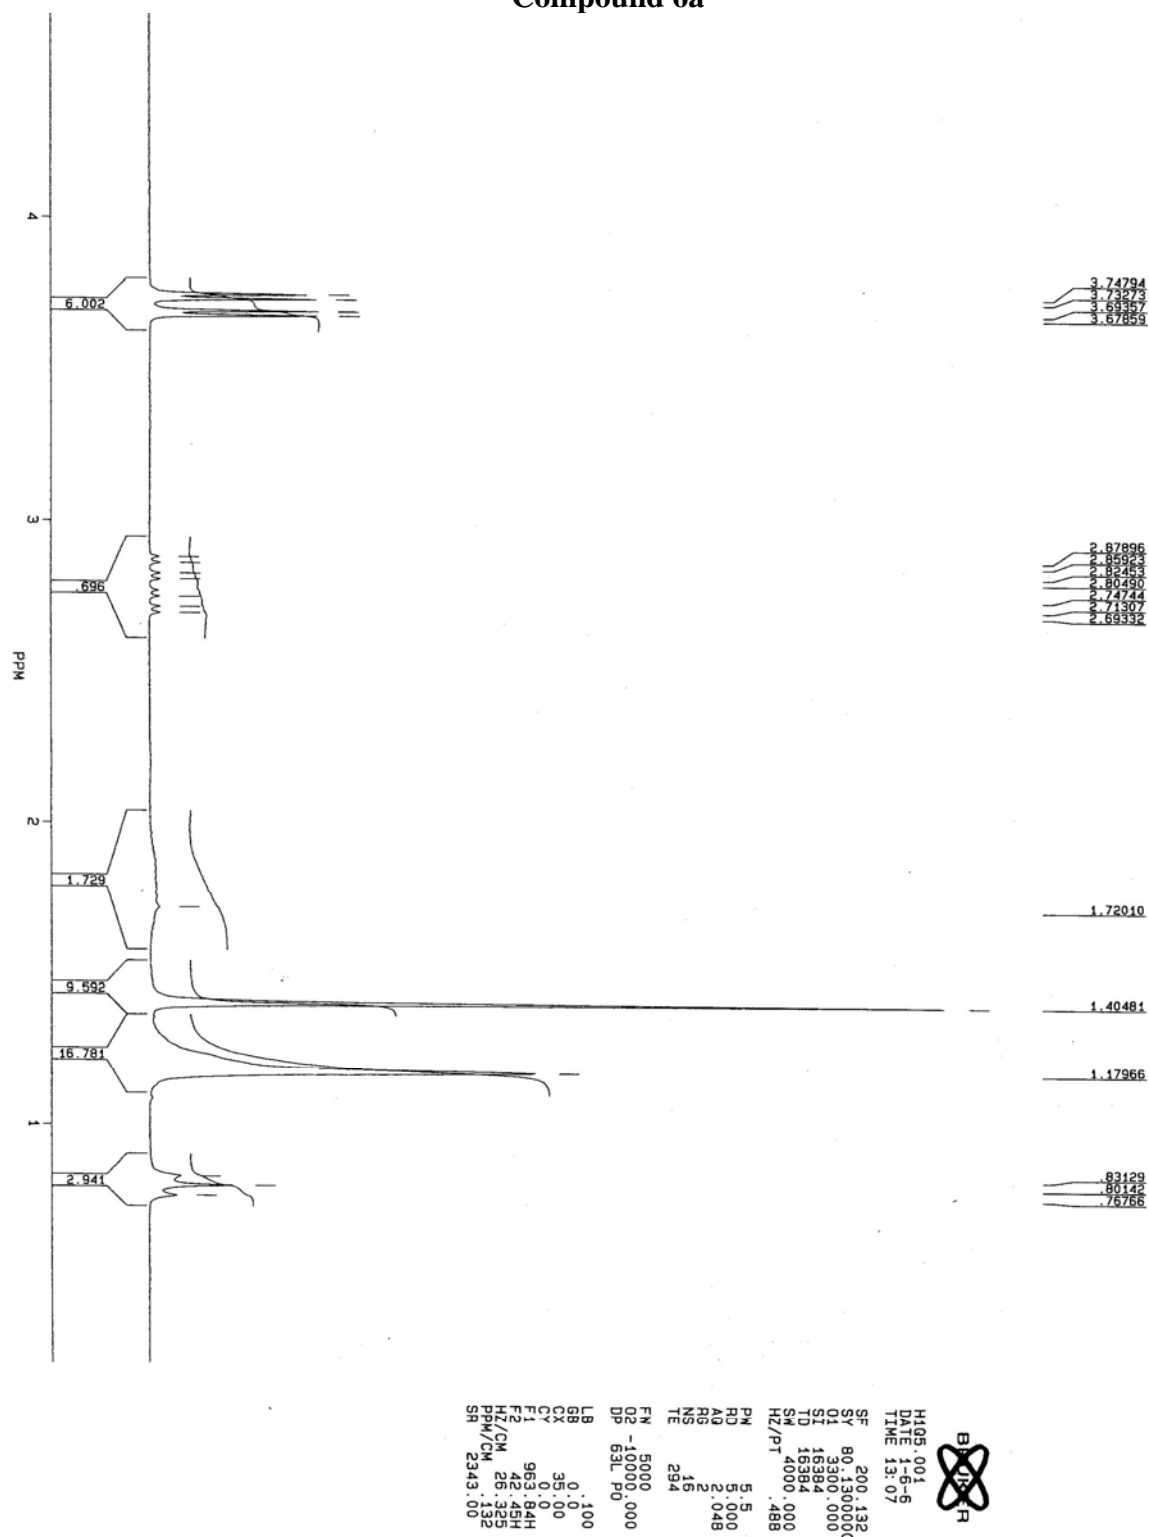

# Compound 6a

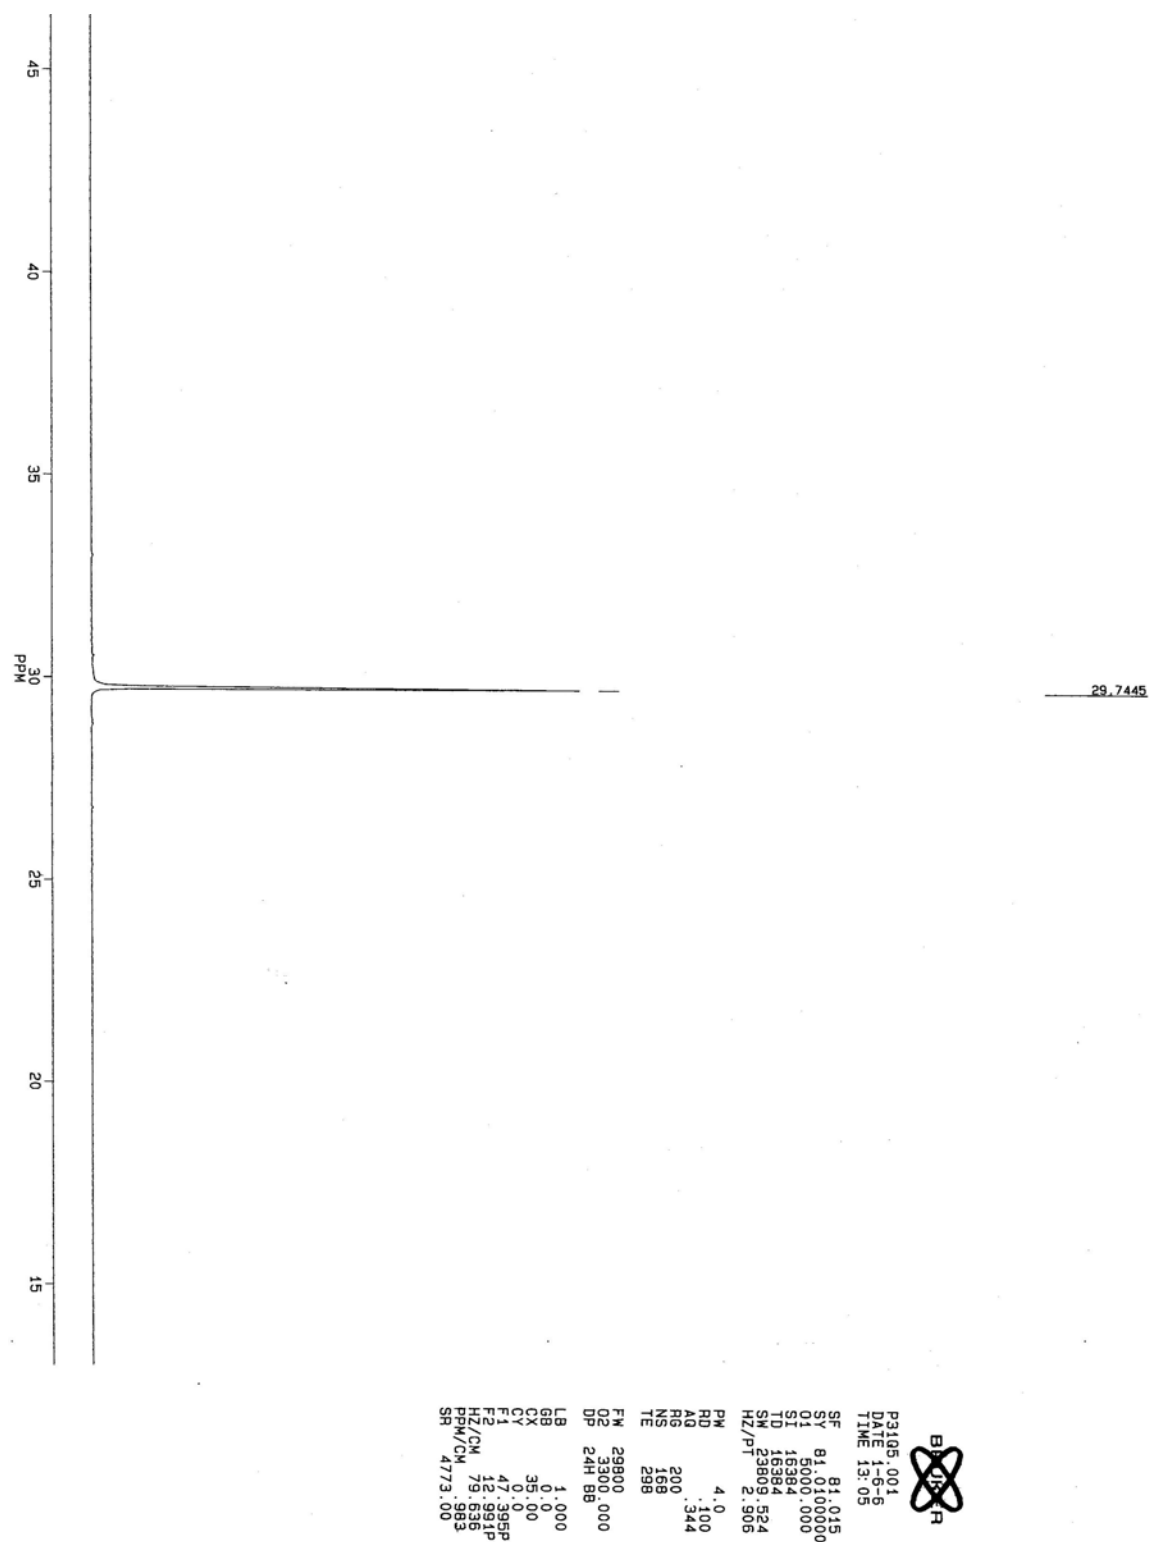



# Compound 6a

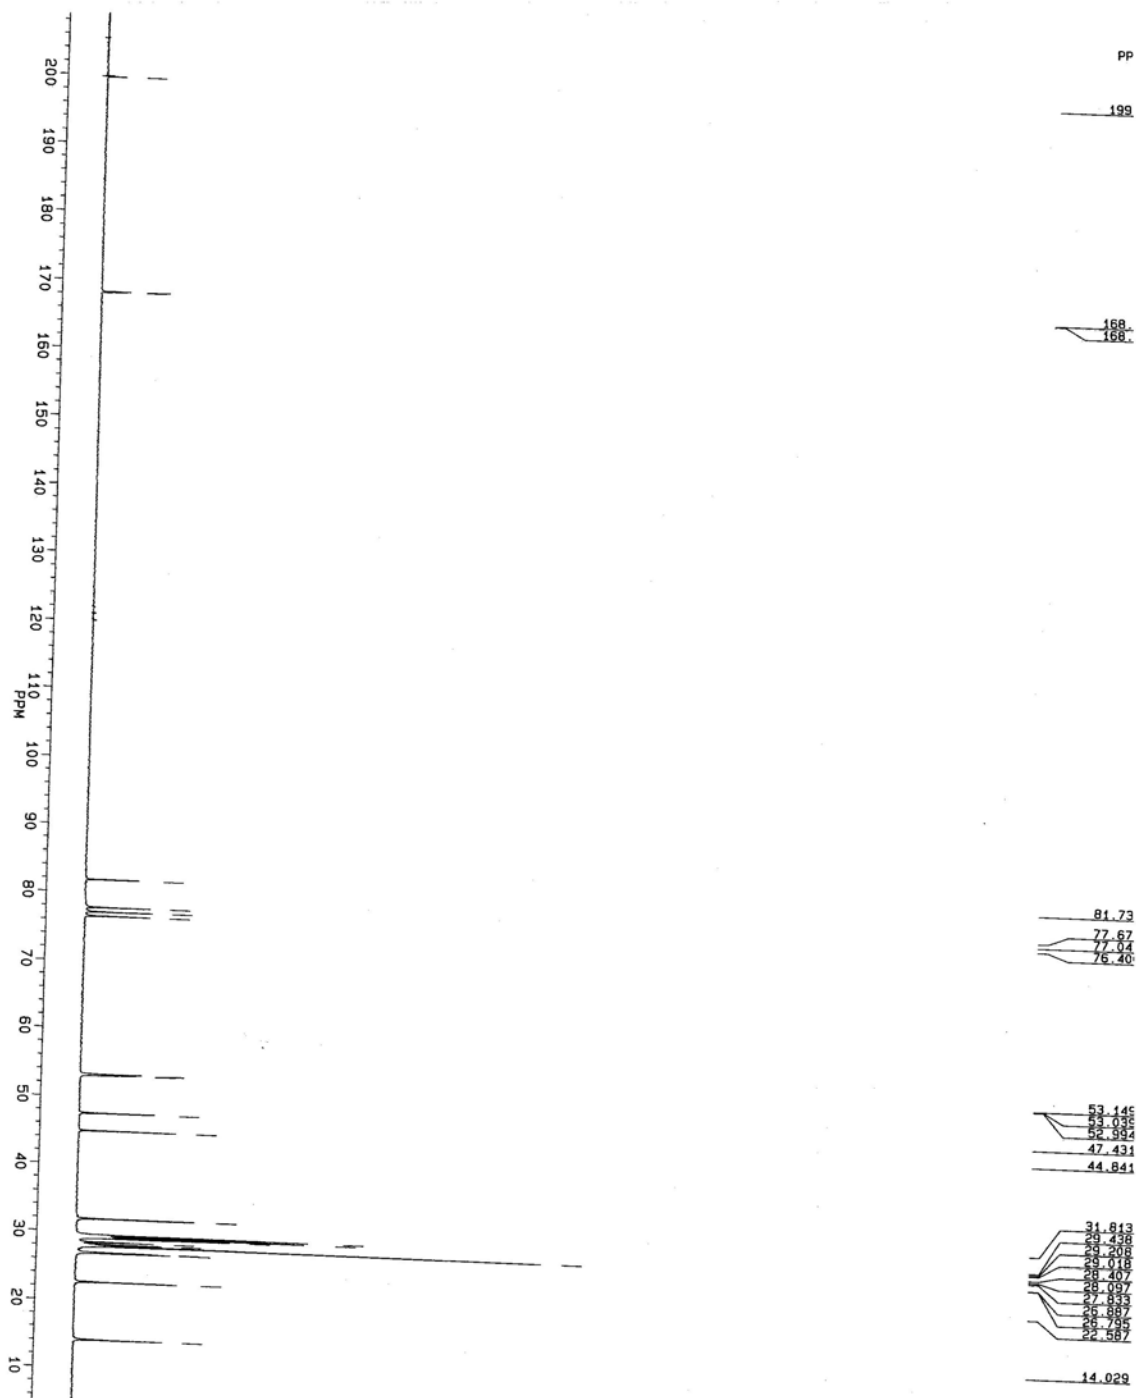

SG327C13.008  
 AU PROG: SAVEDC  
 DATE 13-6-6  
 TIME 6:11  
 SF 50.323  
 SY 50.32000  
 O1 8500.000  
 SI 16384  
 TD 16384  
 SM 11904.762  
 HZ/PT 1.453  
 PM 4.0  
 RD 0.0  
 AG 0.688  
 NS 23040  
 TE 287  
 FW 14900  
 O2 3300.000  
 DP 24H BB  
 LB 1.000  
 BB 0.0  
 CX 35.00  
 CY 0  
 F1 209.015P  
 F2 5.621P  
 HZ/CM 293.852  
 PPM/CM 5.834  
 SR 3318.00

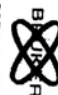

# Compound 6a

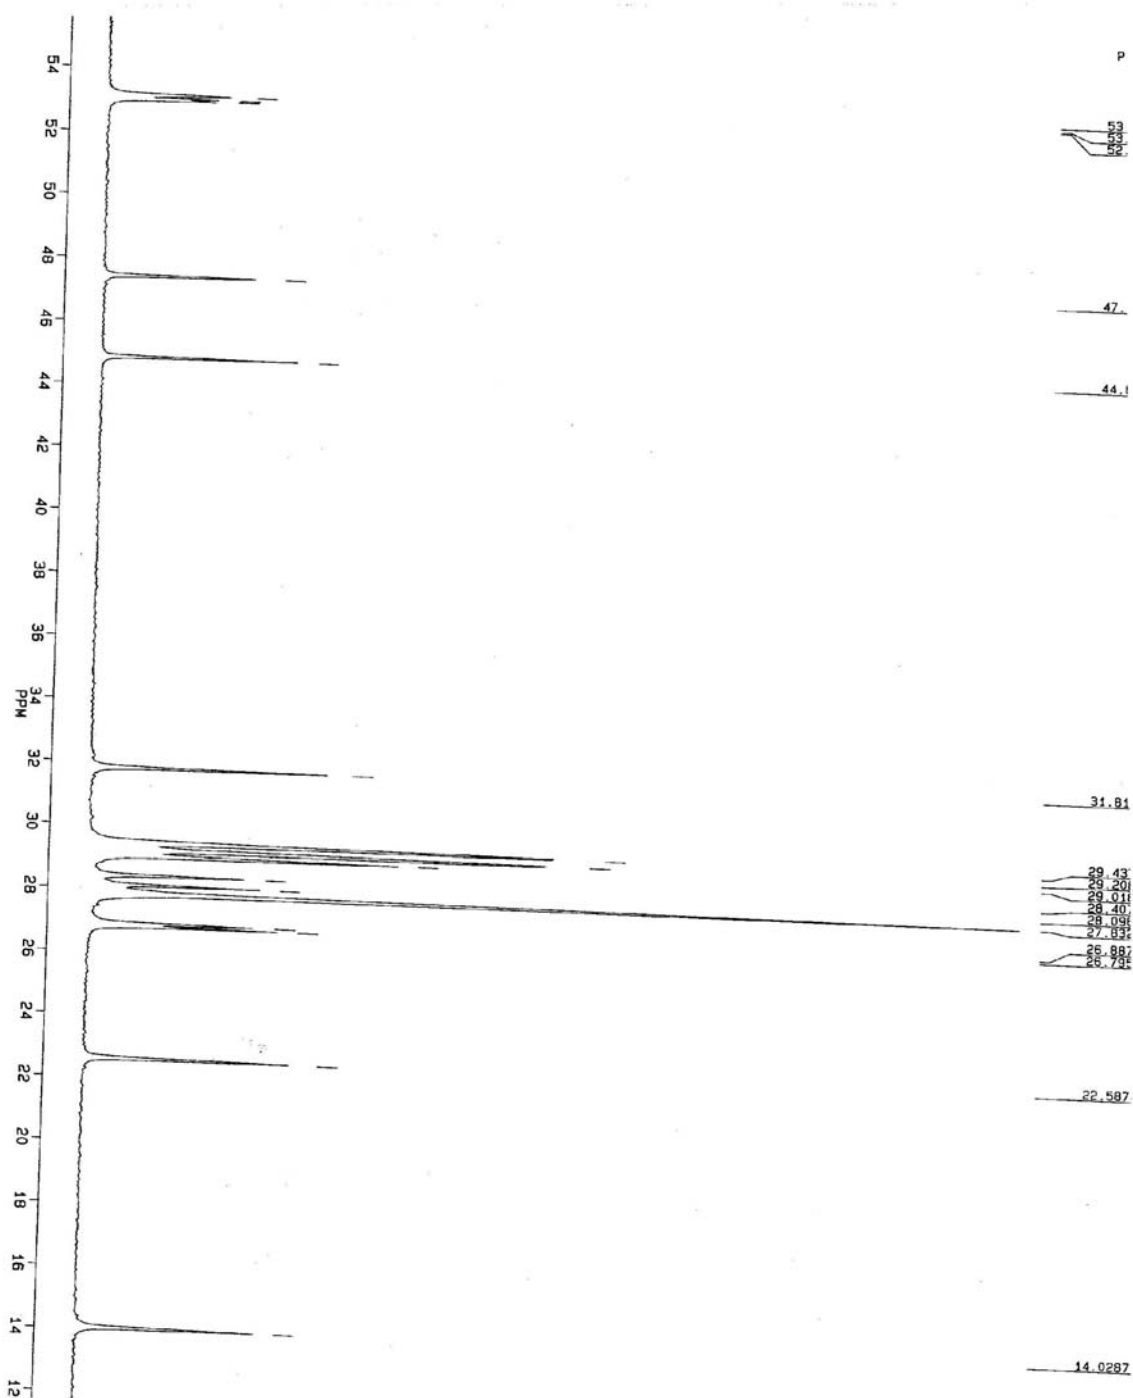

328  
 56327C13.008  
 AU PROB: 13C  
 DATE: 13-6-6  
 TIME: 6:11  
 SF: 50.323  
 O1: 80.200000  
 SI: 153.000000  
 TD: 16384  
 SW: 11904.762  
 HZ/PT: 1.453  
 PM: 4.0  
 RD: 0.0  
 AG: 0.688  
 RG: 400  
 NS: 23040  
 TE: 297  
 FM: 14900  
 O2: 3300.000  
 DP: 24H BB  
 LB: 1.000  
 GB: 0.0  
 CX: 35.00  
 E1: 0.0  
 F2: 50.300  
 HZ/CM: 51.300  
 PPM/CM: 1.258  
 SR: 3318.00

# Compound 6b

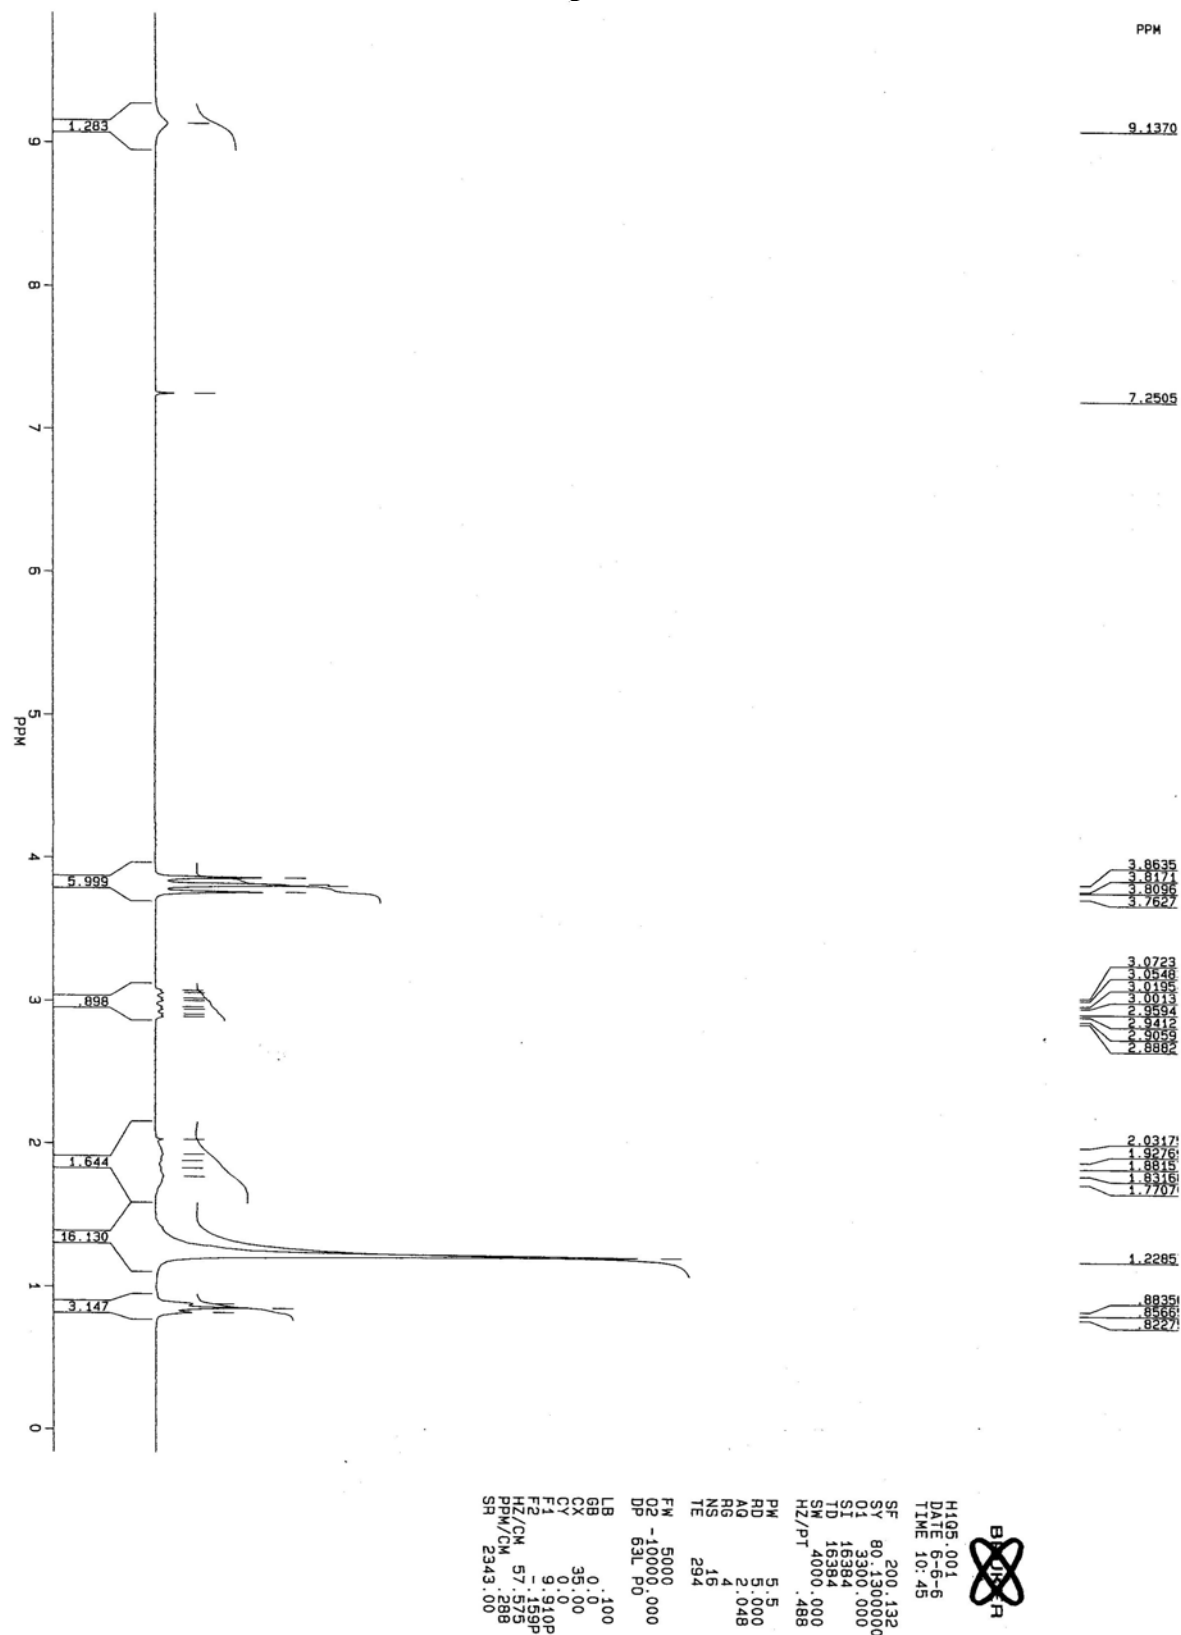

# Compound 6b

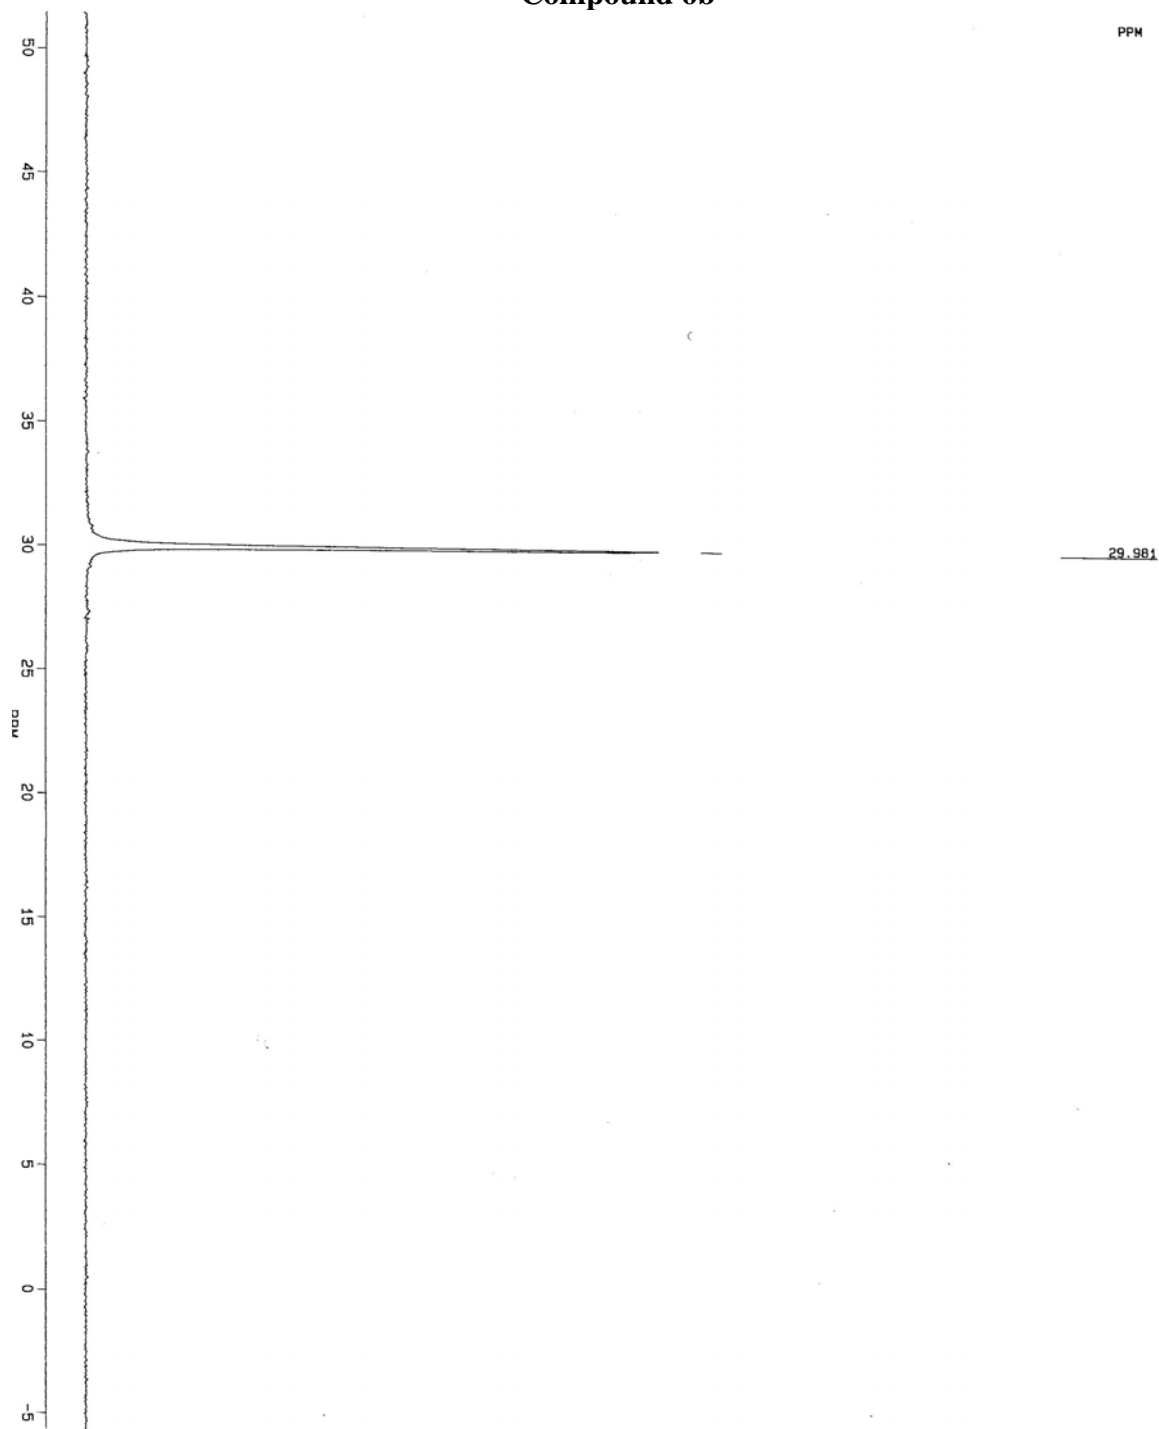

  
 P310E.001  
 D15 60-45  
 TIME 10:45  
 SF 81.015  
 SY 81.0100000  
 O1 5000.000  
 SI 16384  
 TD 16384  
 SW 23809.524  
 HZ/PT 2.906  
 PM 4.0  
 RD .100  
 AG .344  
 NS 200  
 TS 242  
 TE 298  
 FM 29800  
 O2 3300.000  
 DP 24H BB  
 LB 1.000  
 GB 0.0  
 CX 35.00  
 CY 0.0  
 F1 4168.13H  
 F2 -479.16H  
 FZ/CN 132.83  
 PM/CN 1.83  
 SR 4773.00

# Compound 6b

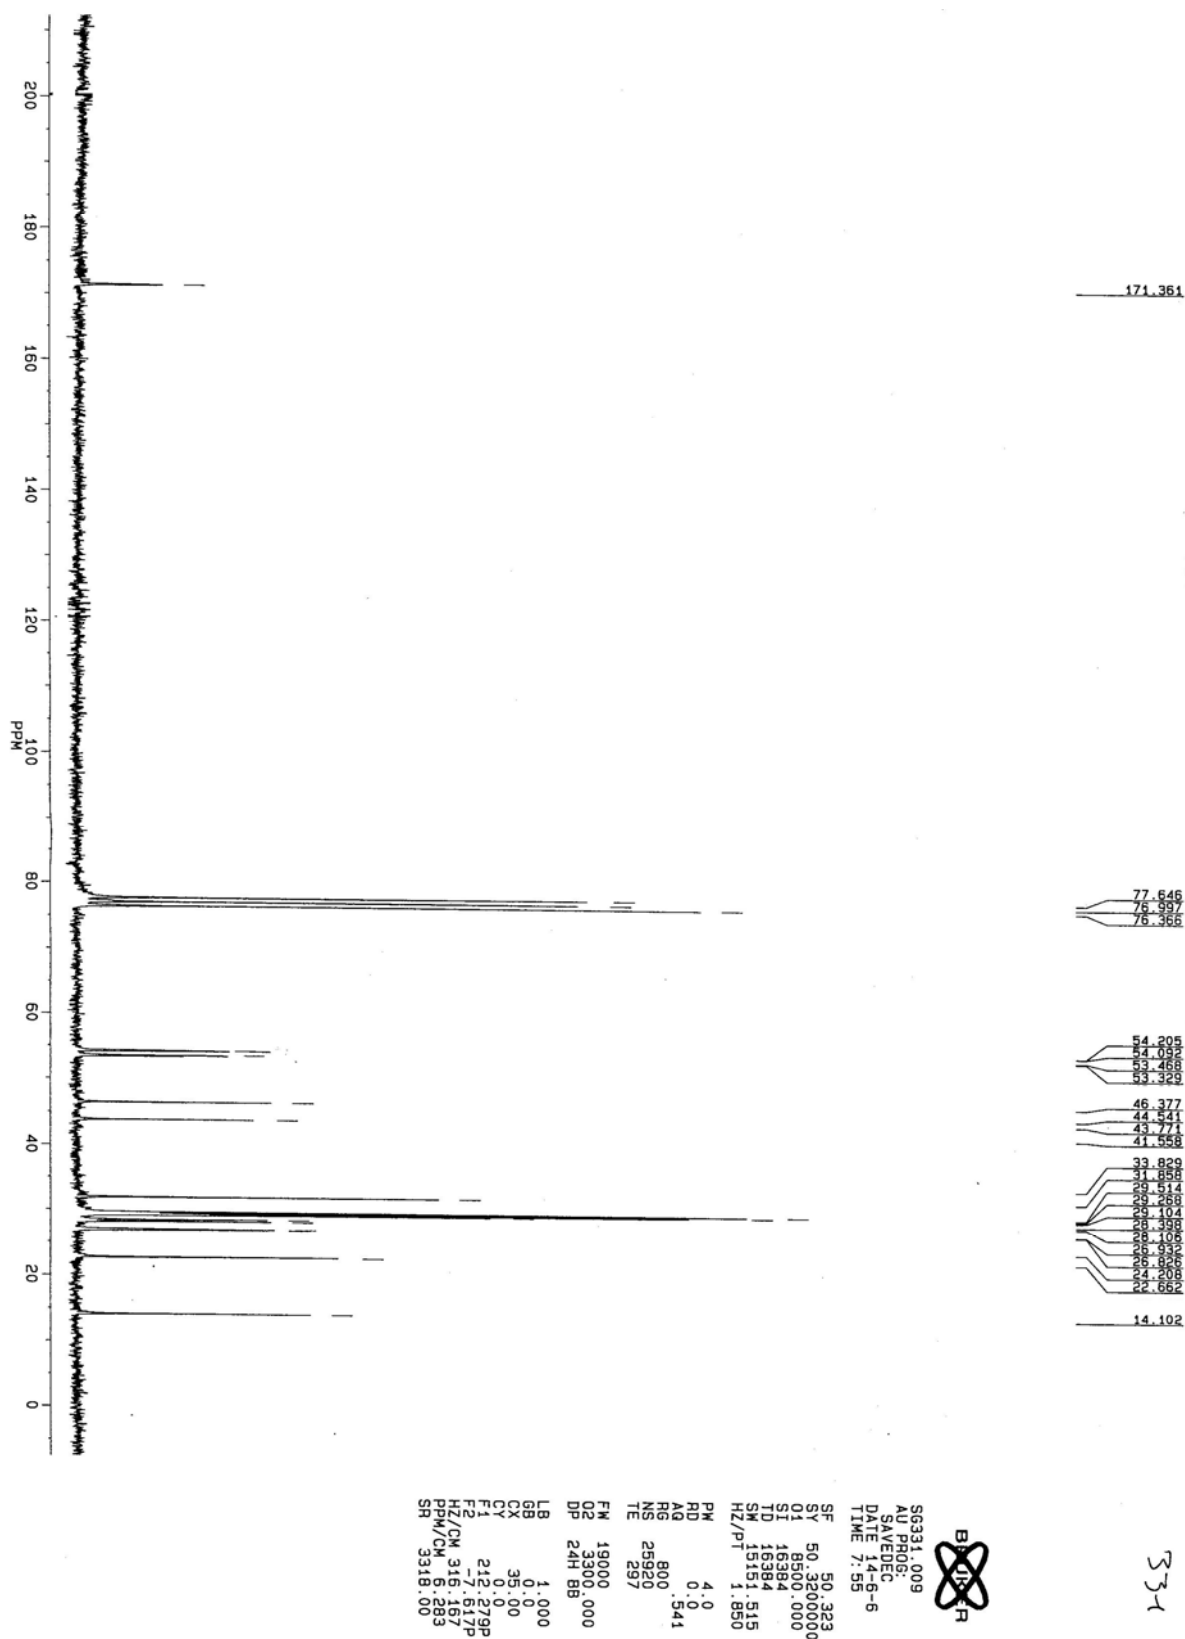

# Compound 7

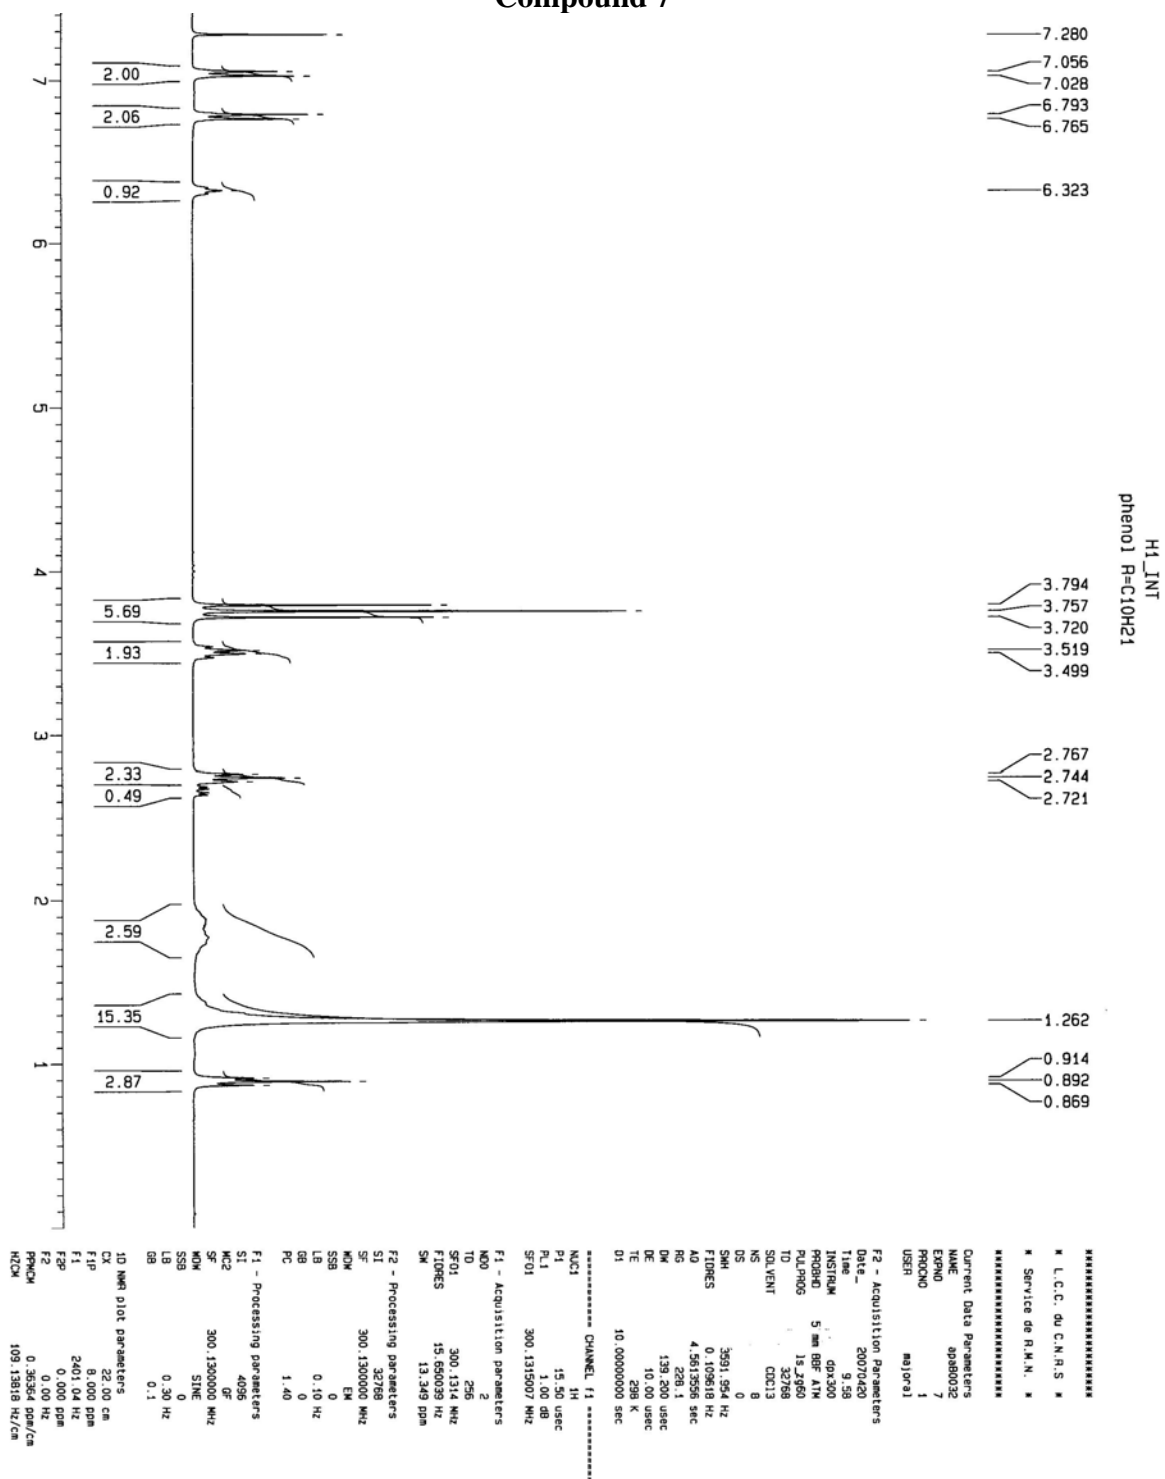

# Compound 7

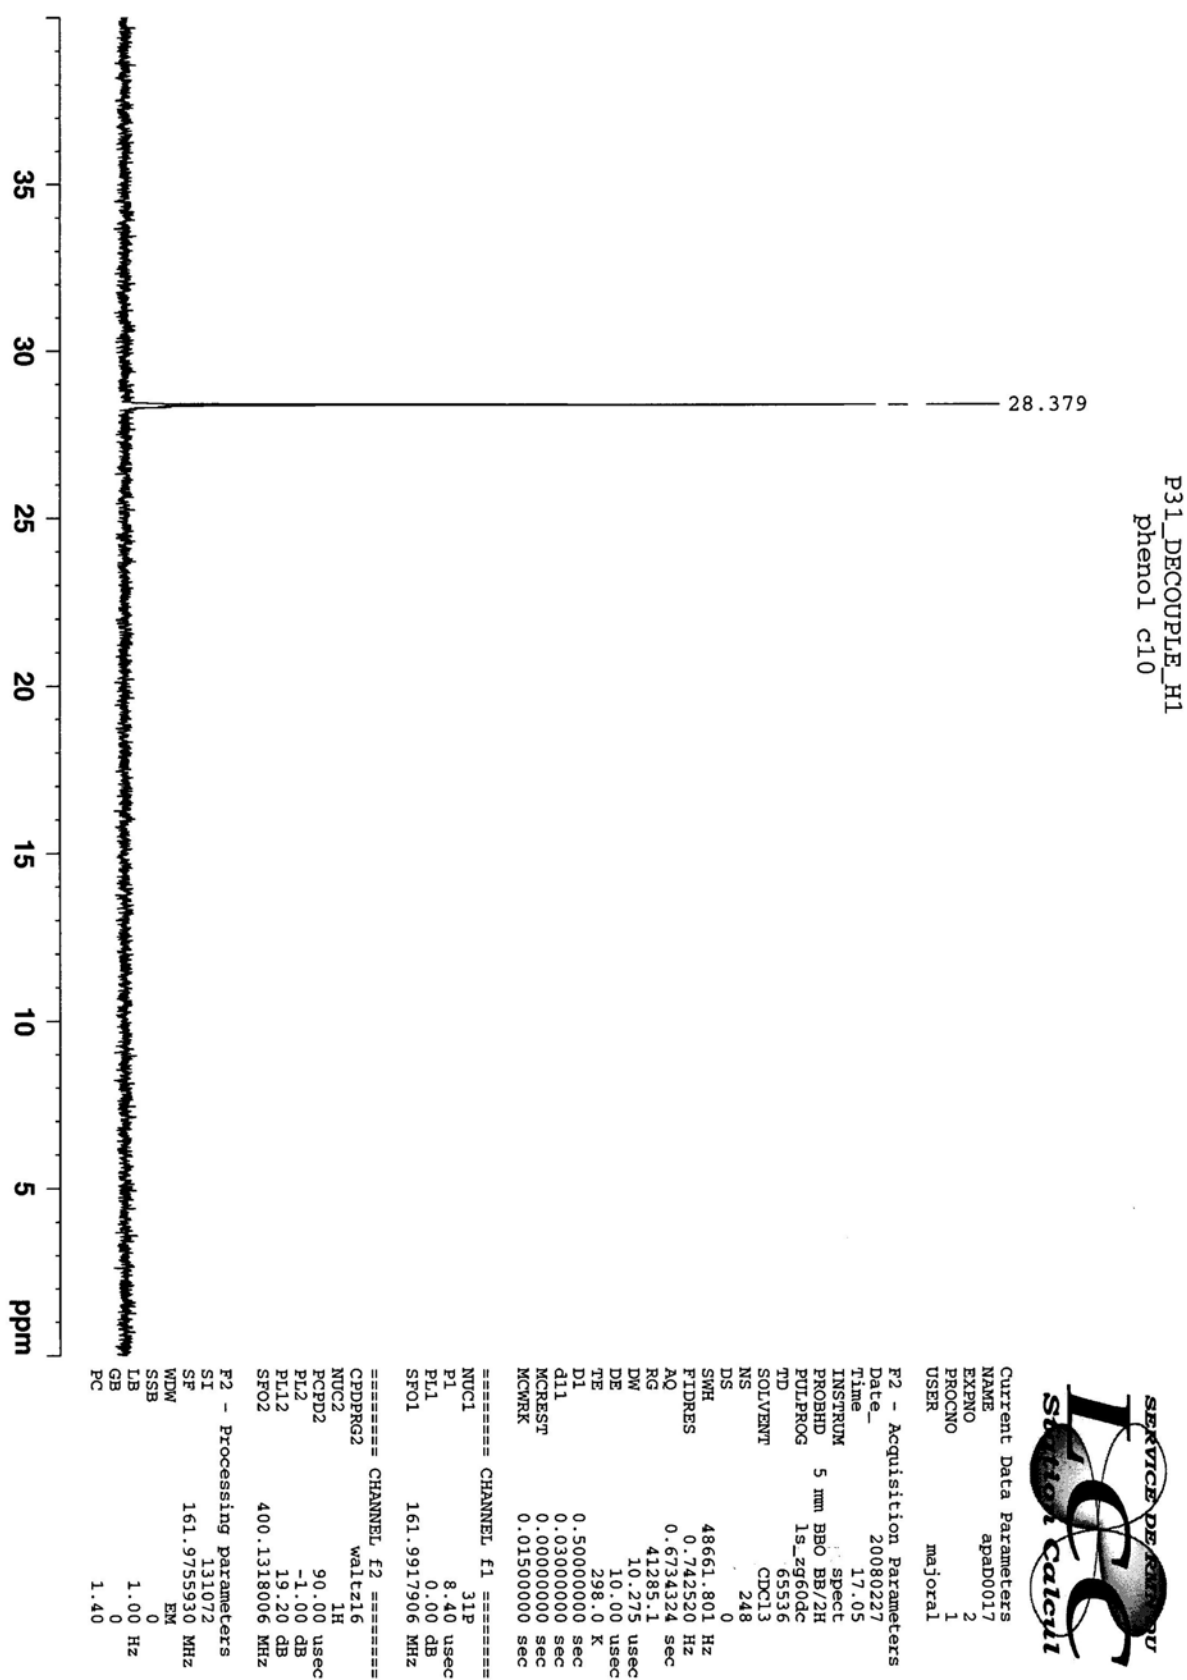

# Compound 7

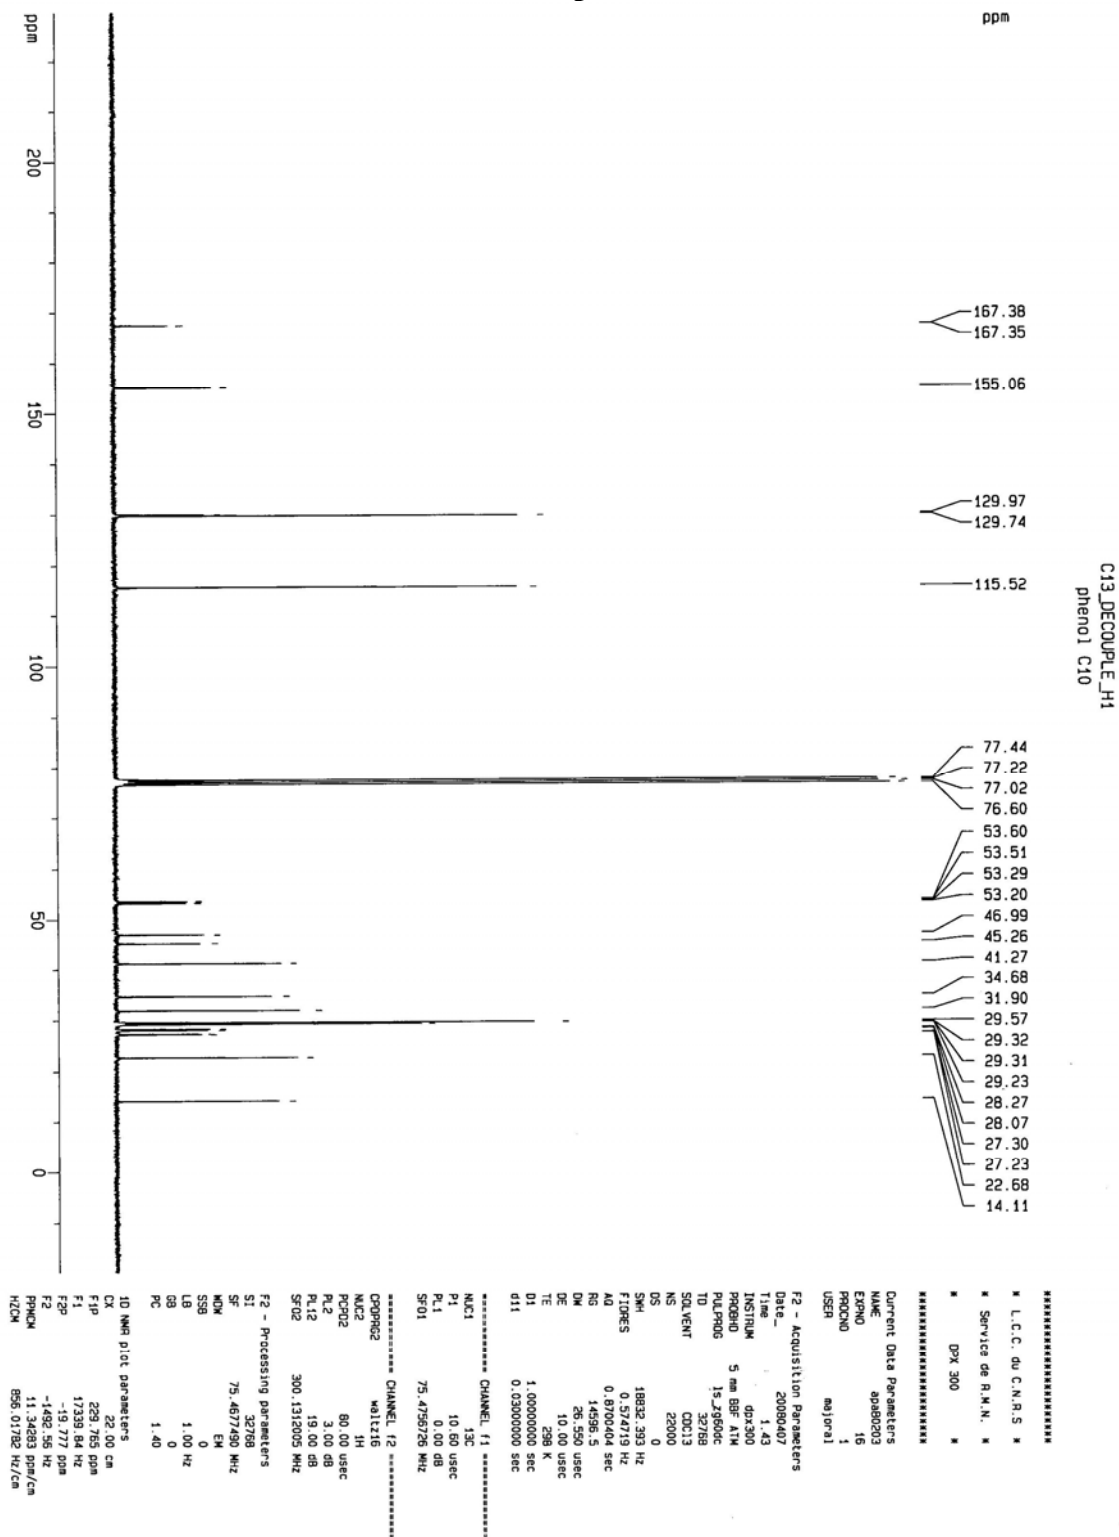



# Compound 7

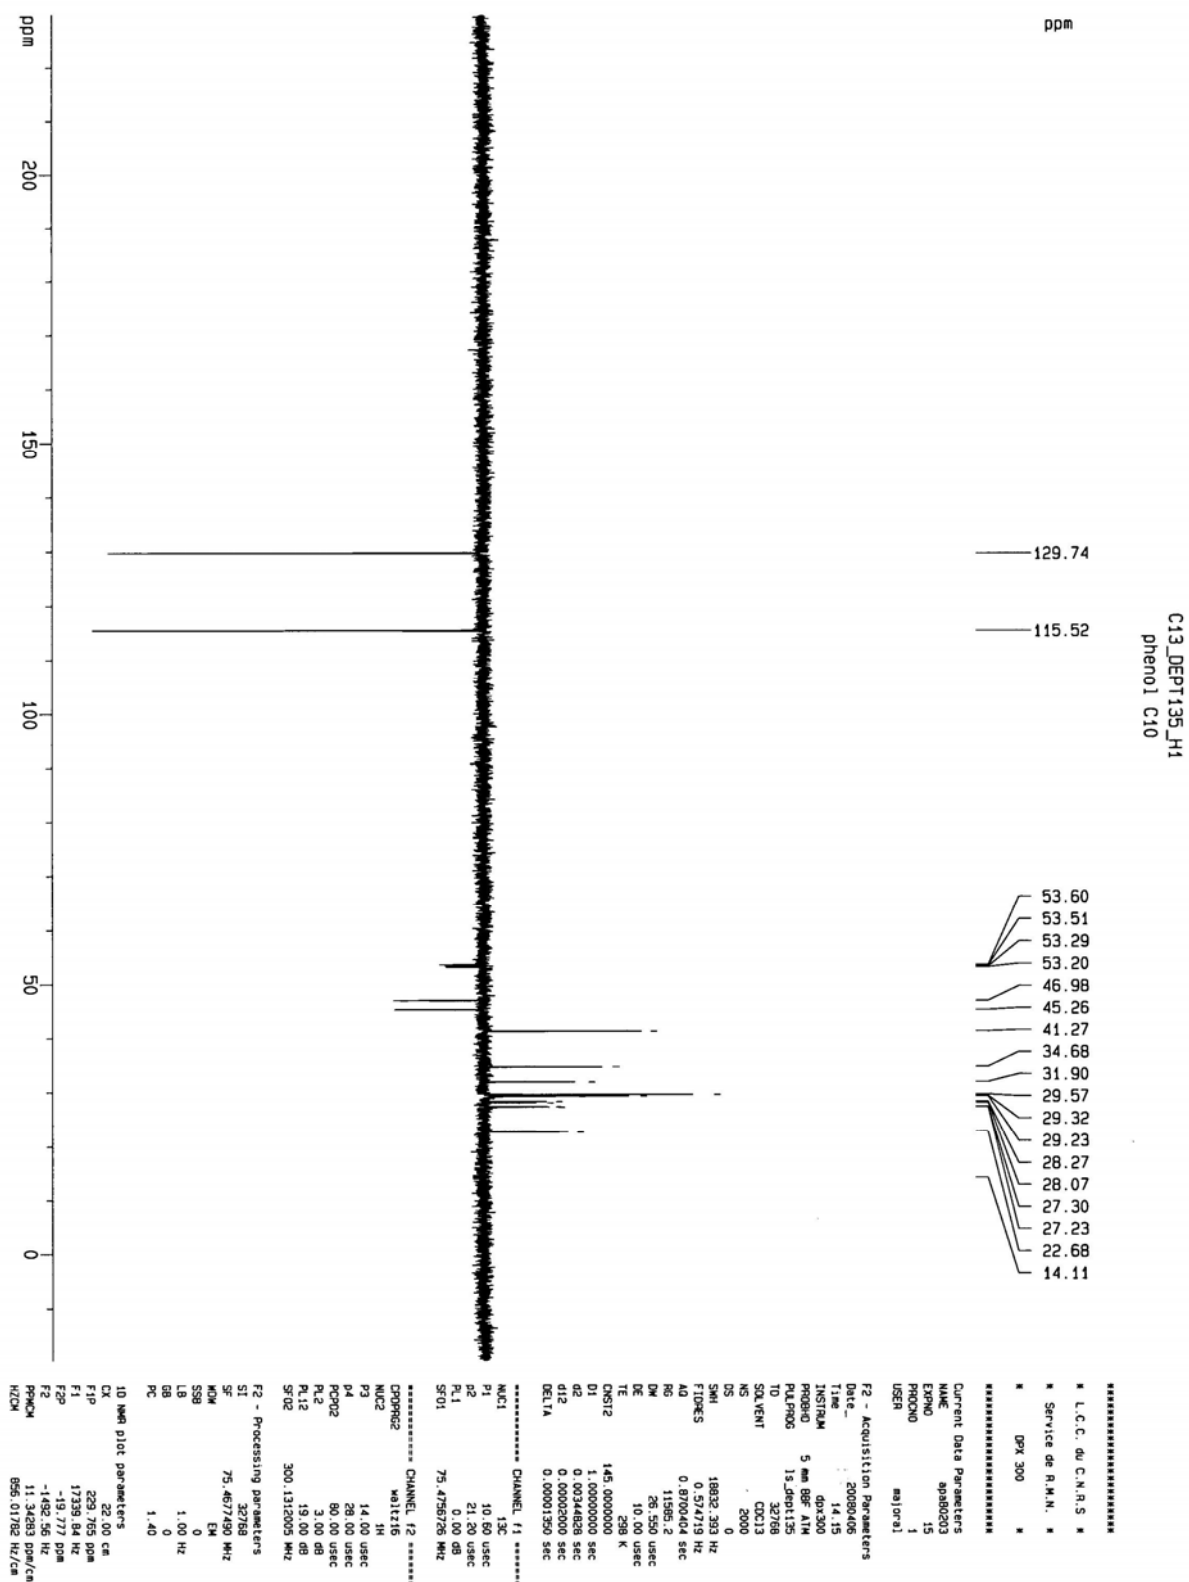

# Compound 7a-Gc'<sub>1</sub>

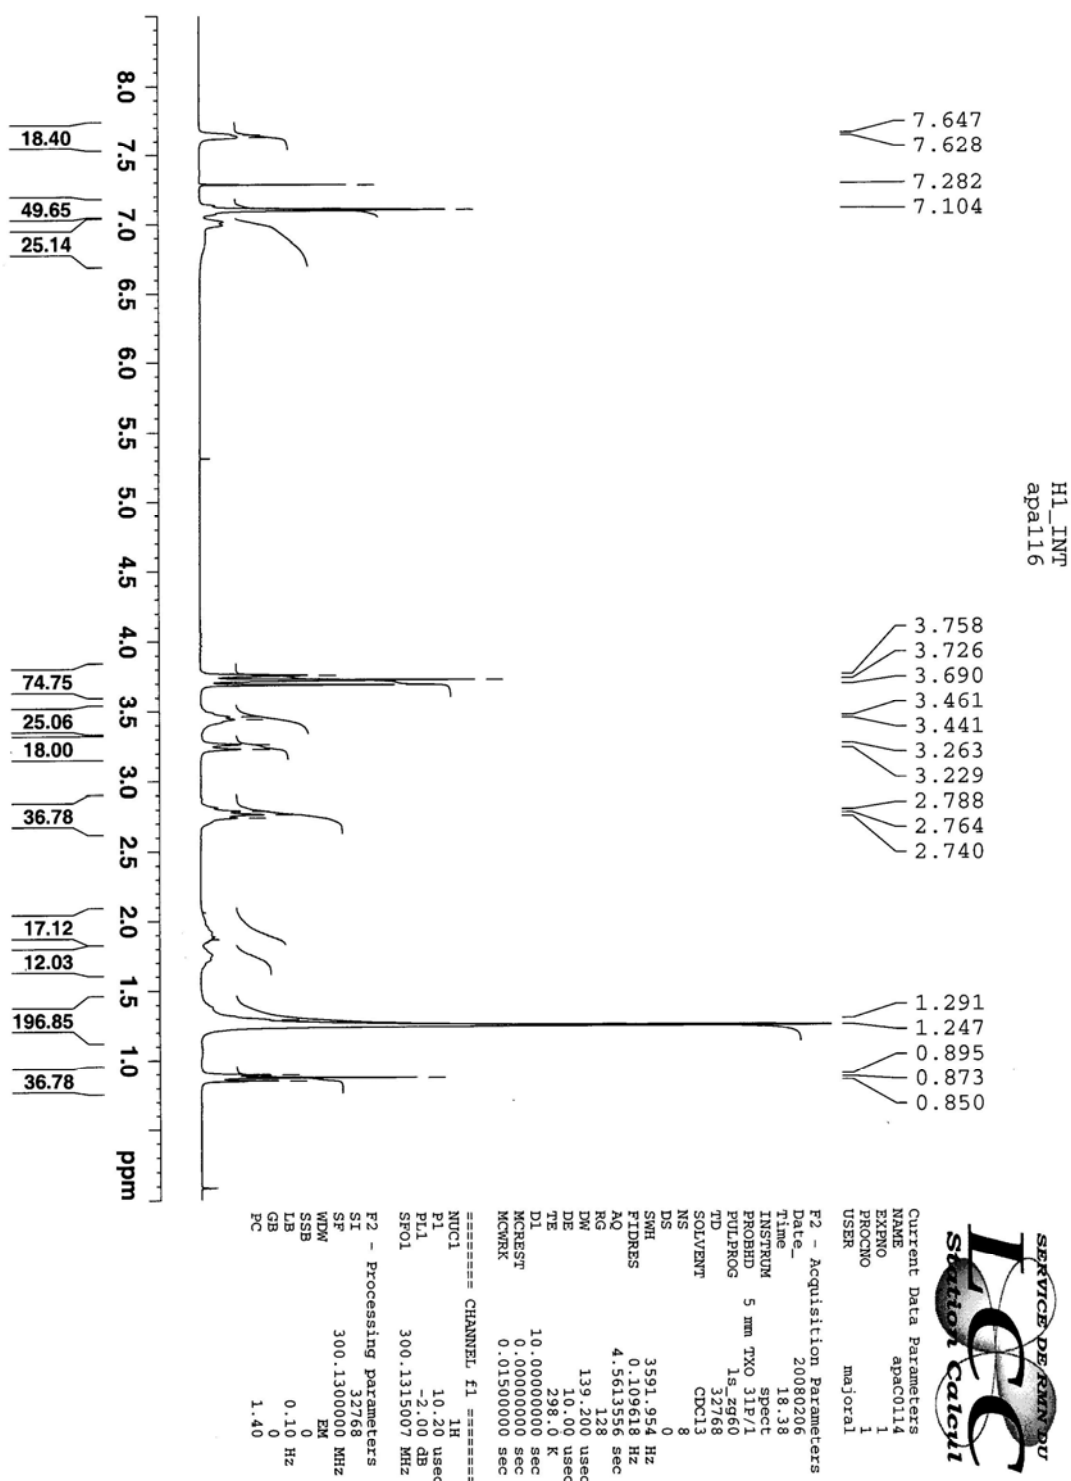

# Compound 7a-Gc'1

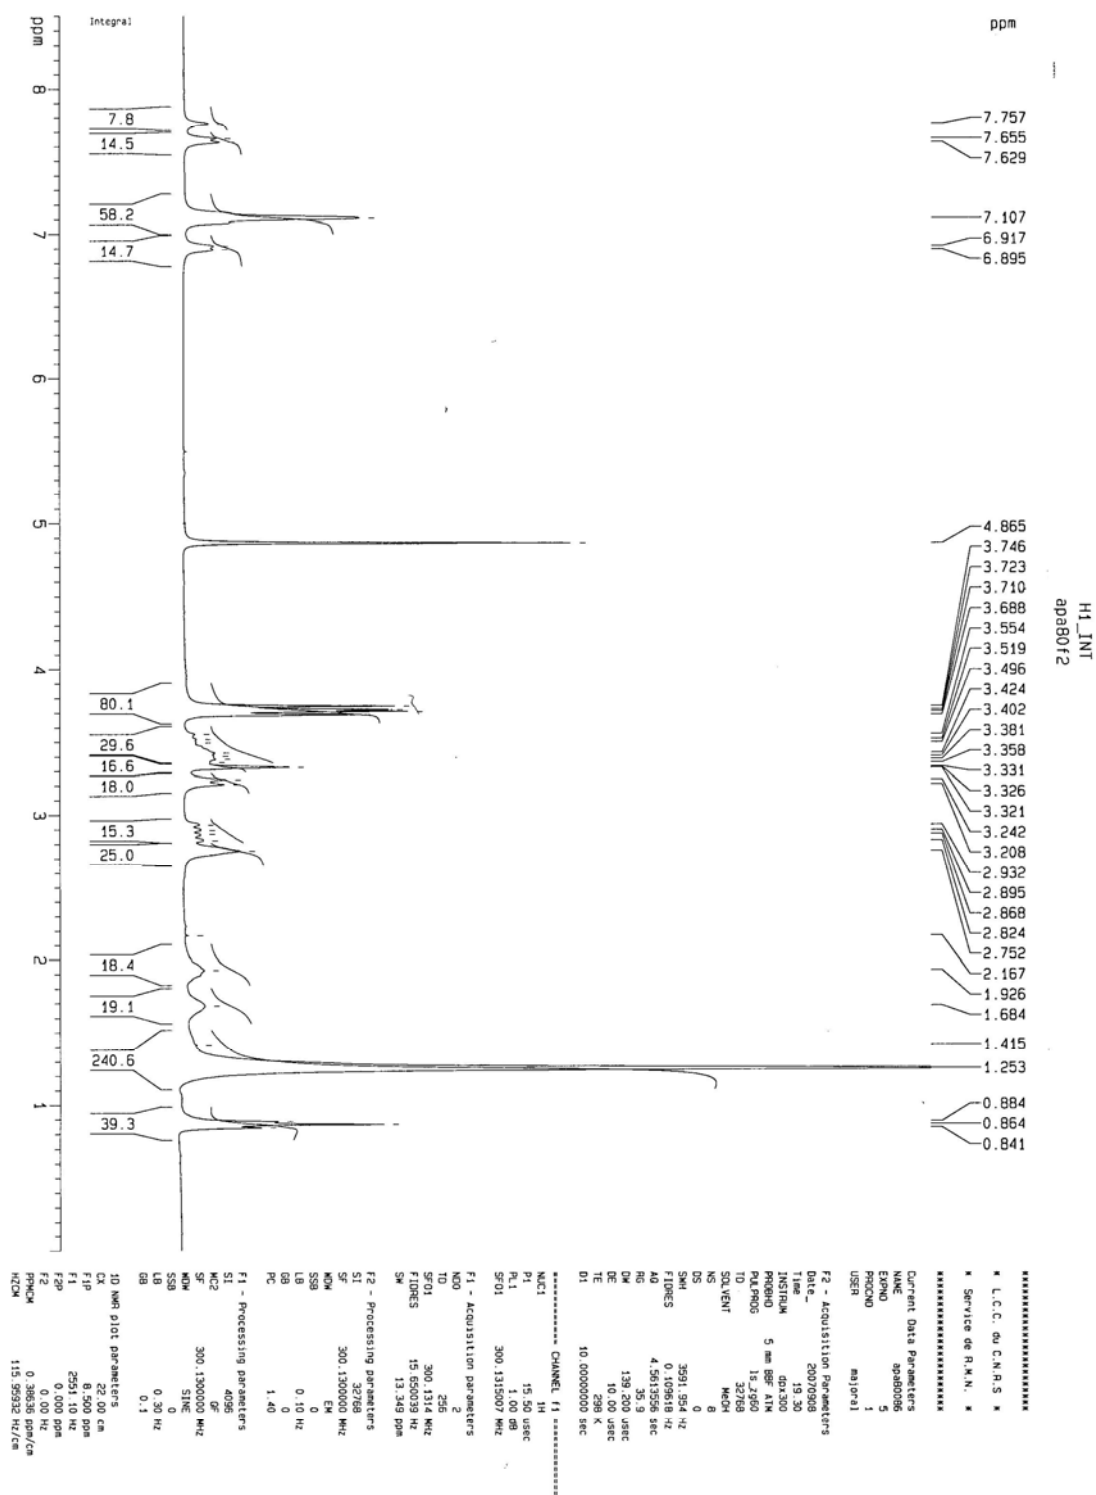

# Compound 7a-Gc'1

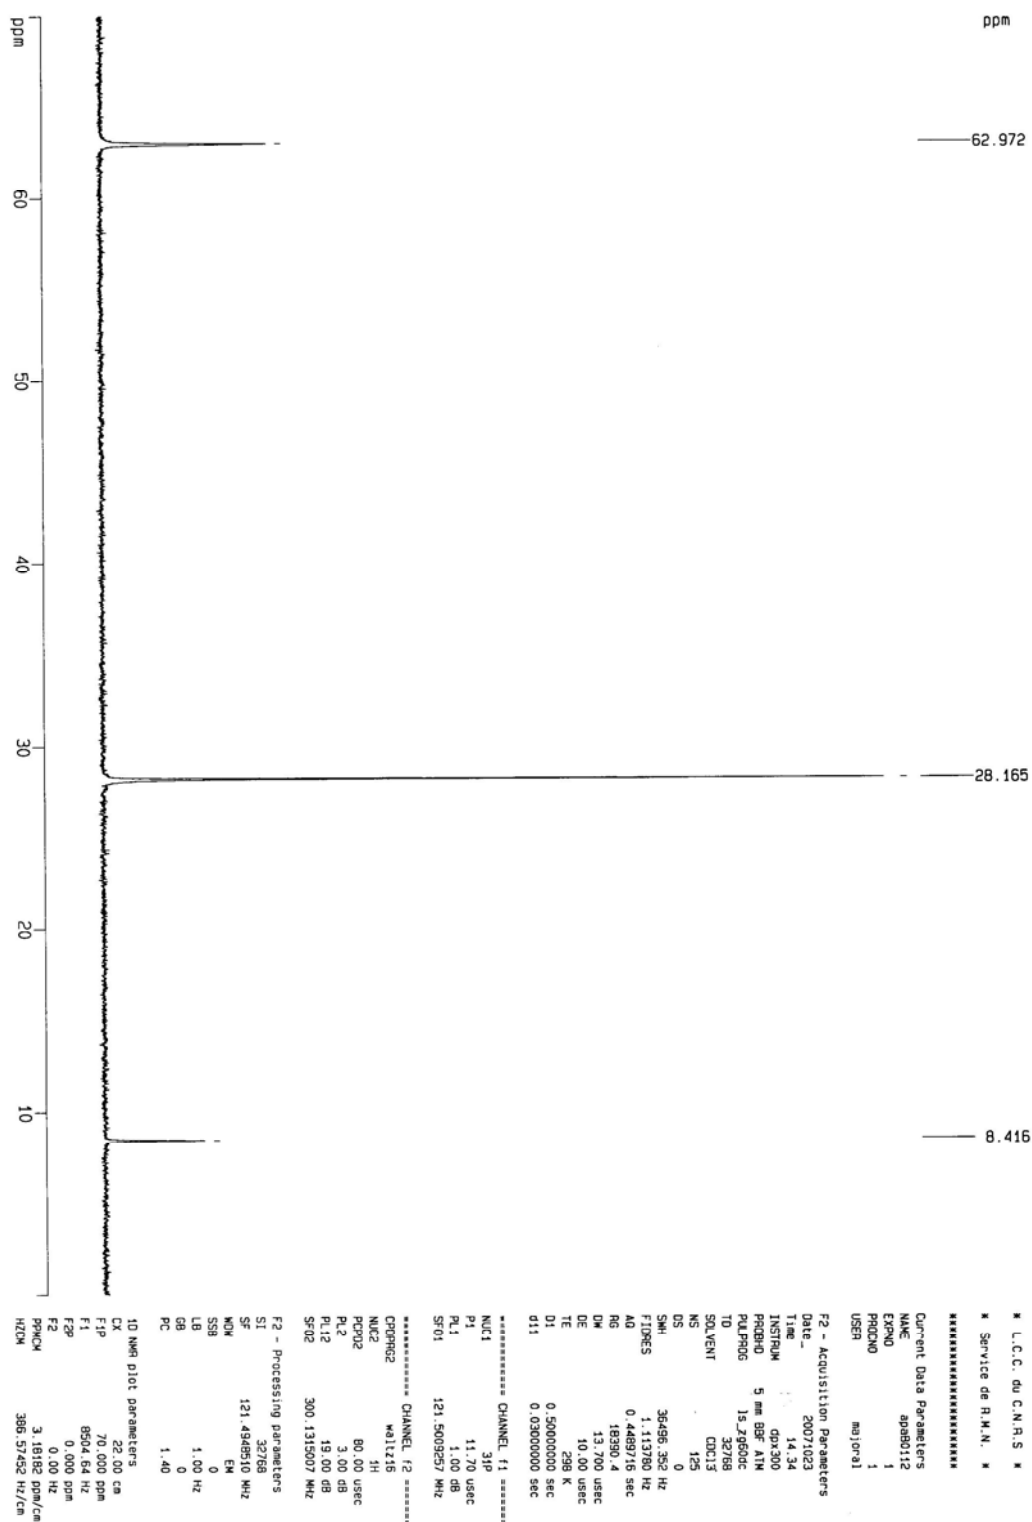

# Compound 7a-Gc'1

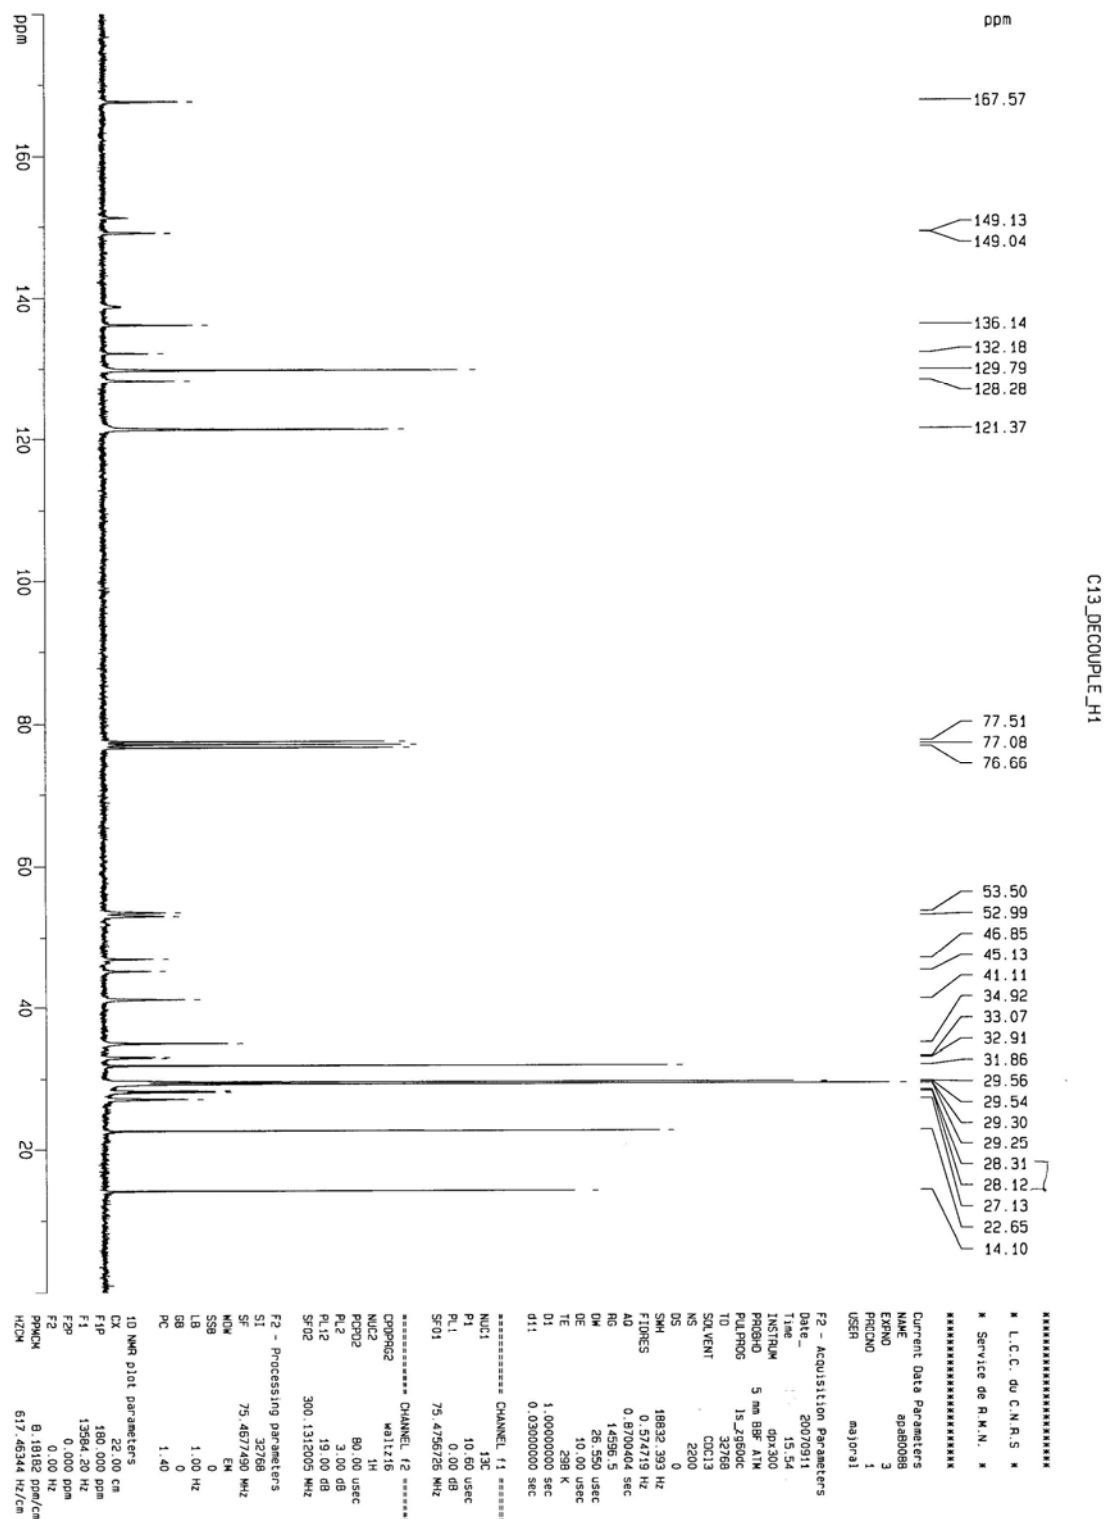

# Compound 7b-Gc'<sub>1</sub>

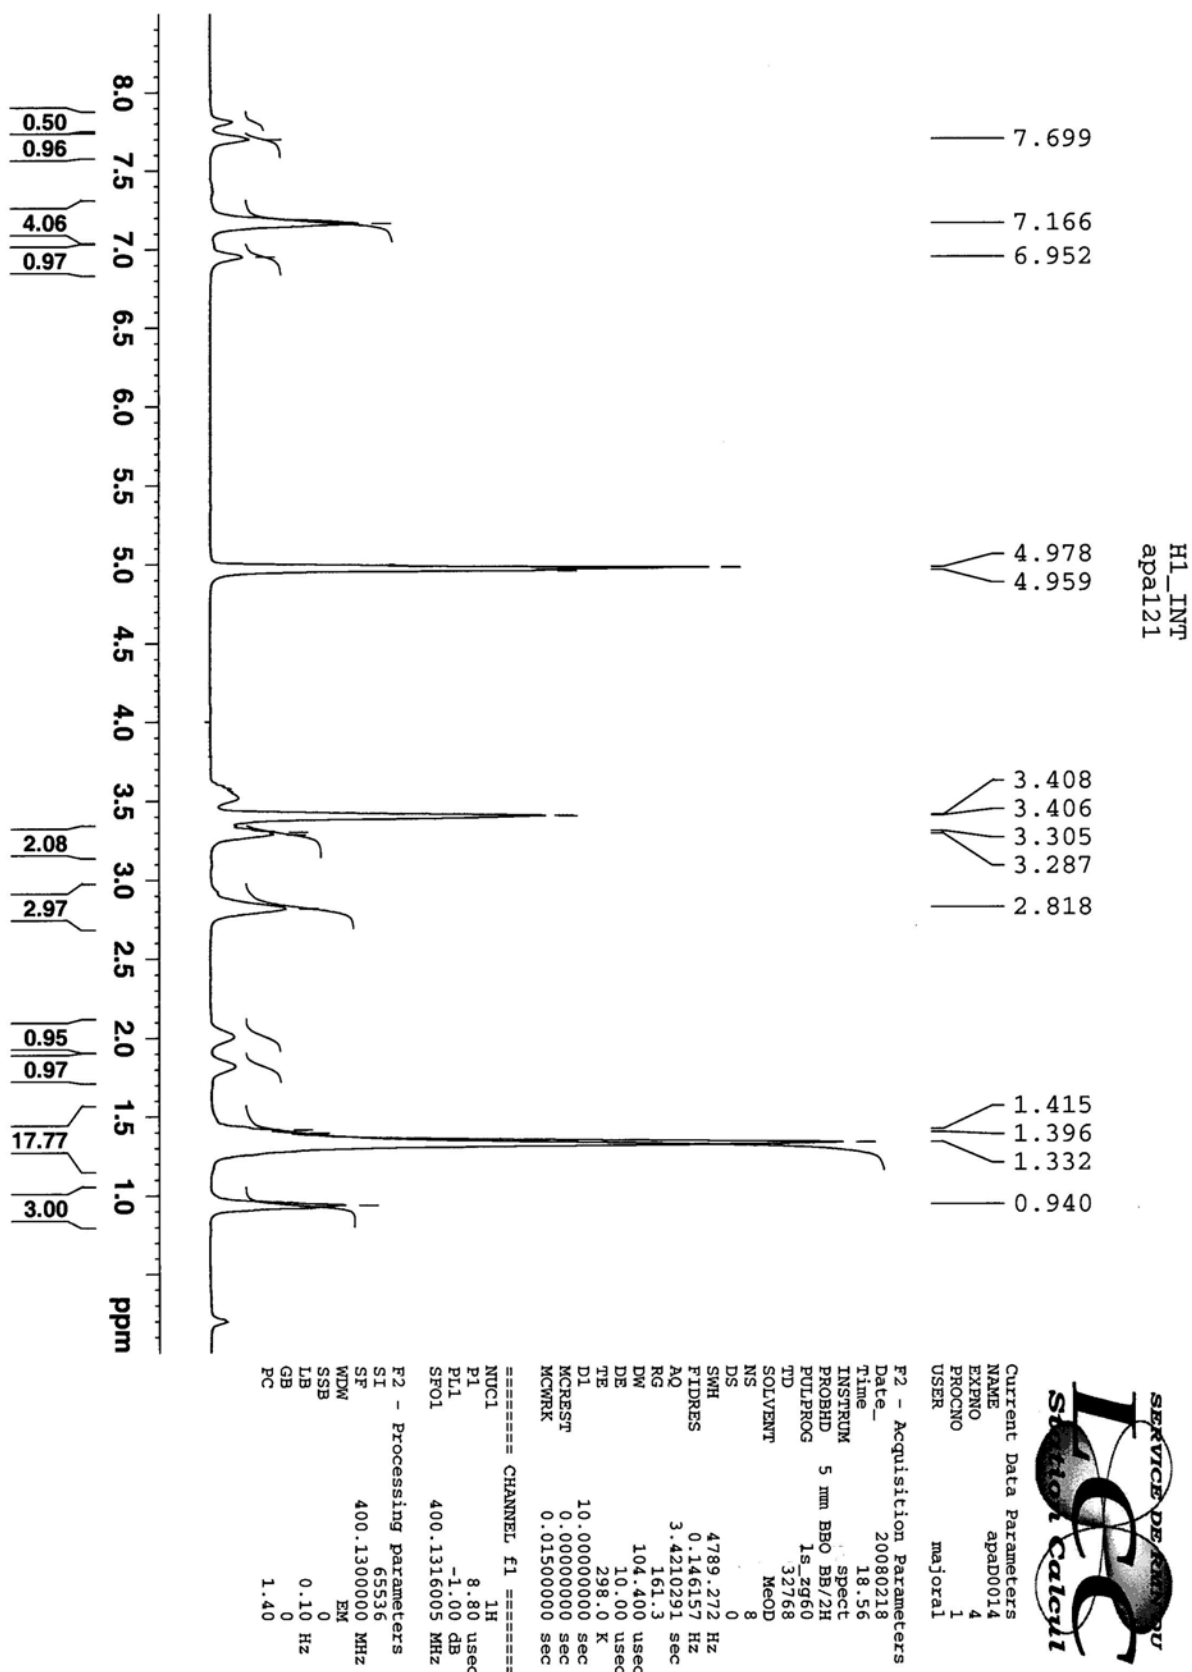

# Compound 7b-Gc'<sub>1</sub>

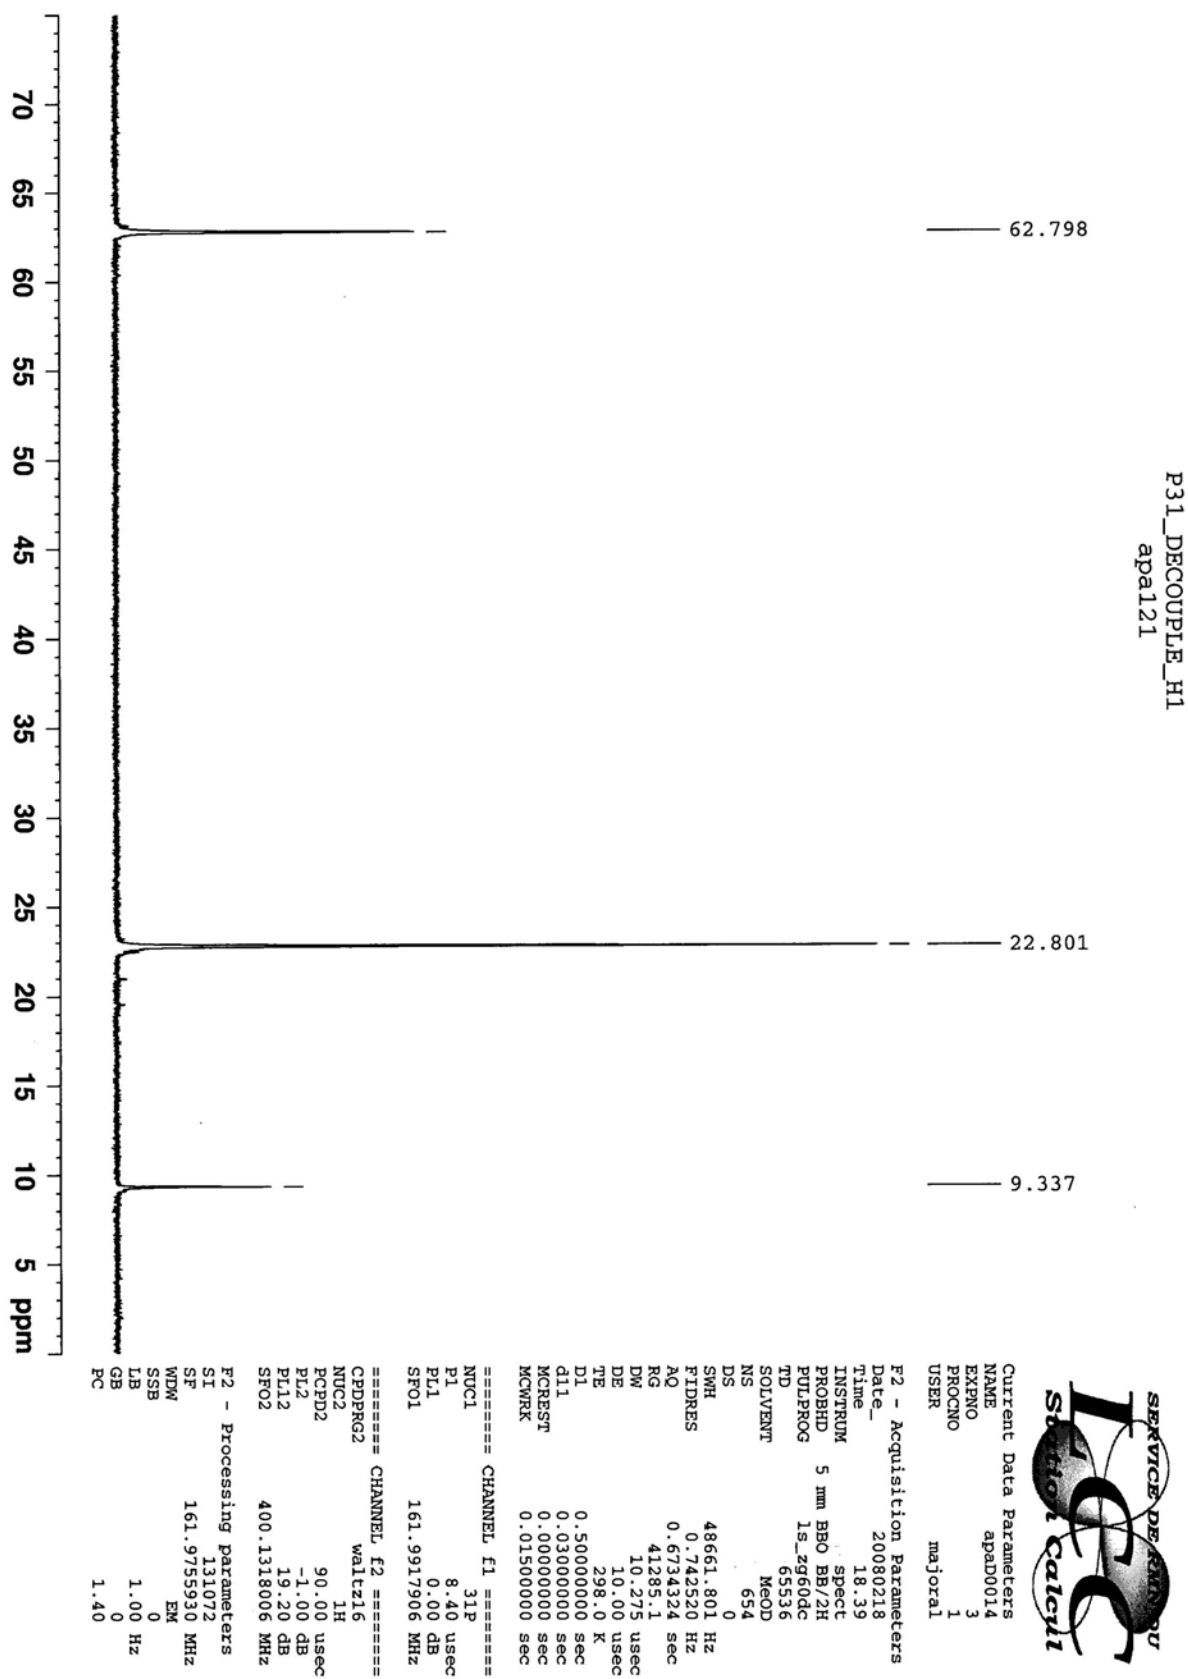

# Compound 7b-Gc'<sub>1</sub>

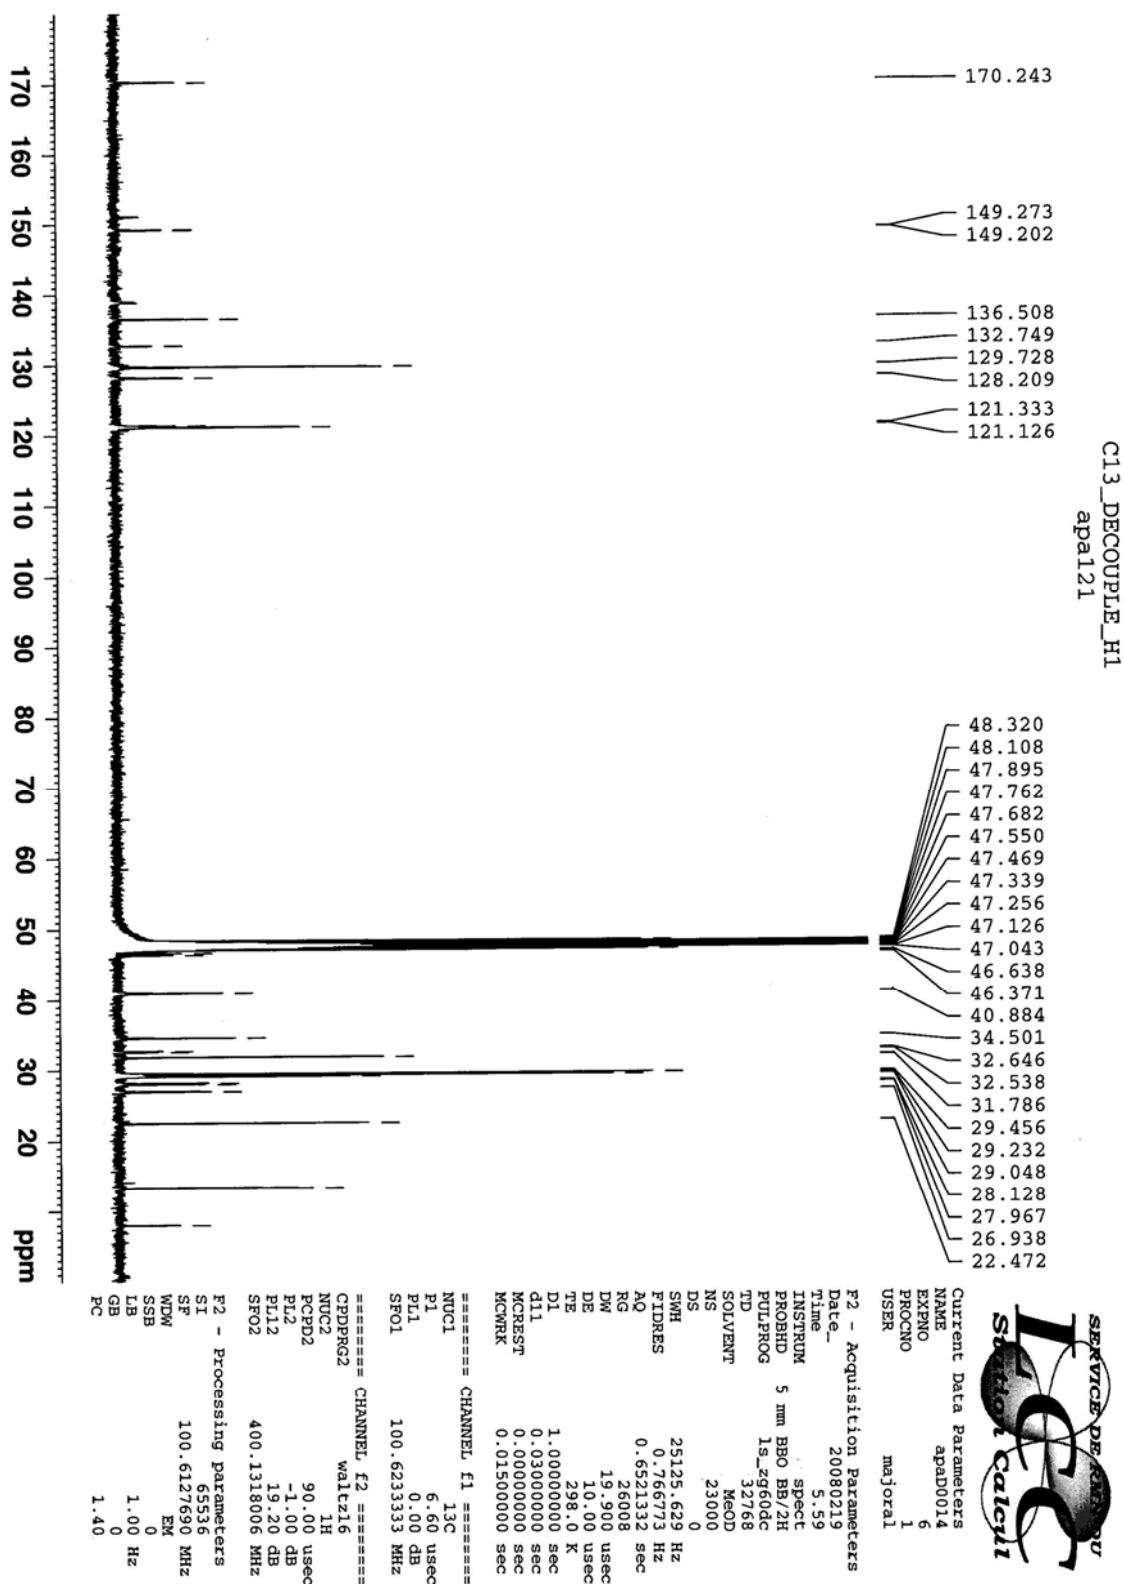



# Compound 7b-Gc'<sub>1</sub>

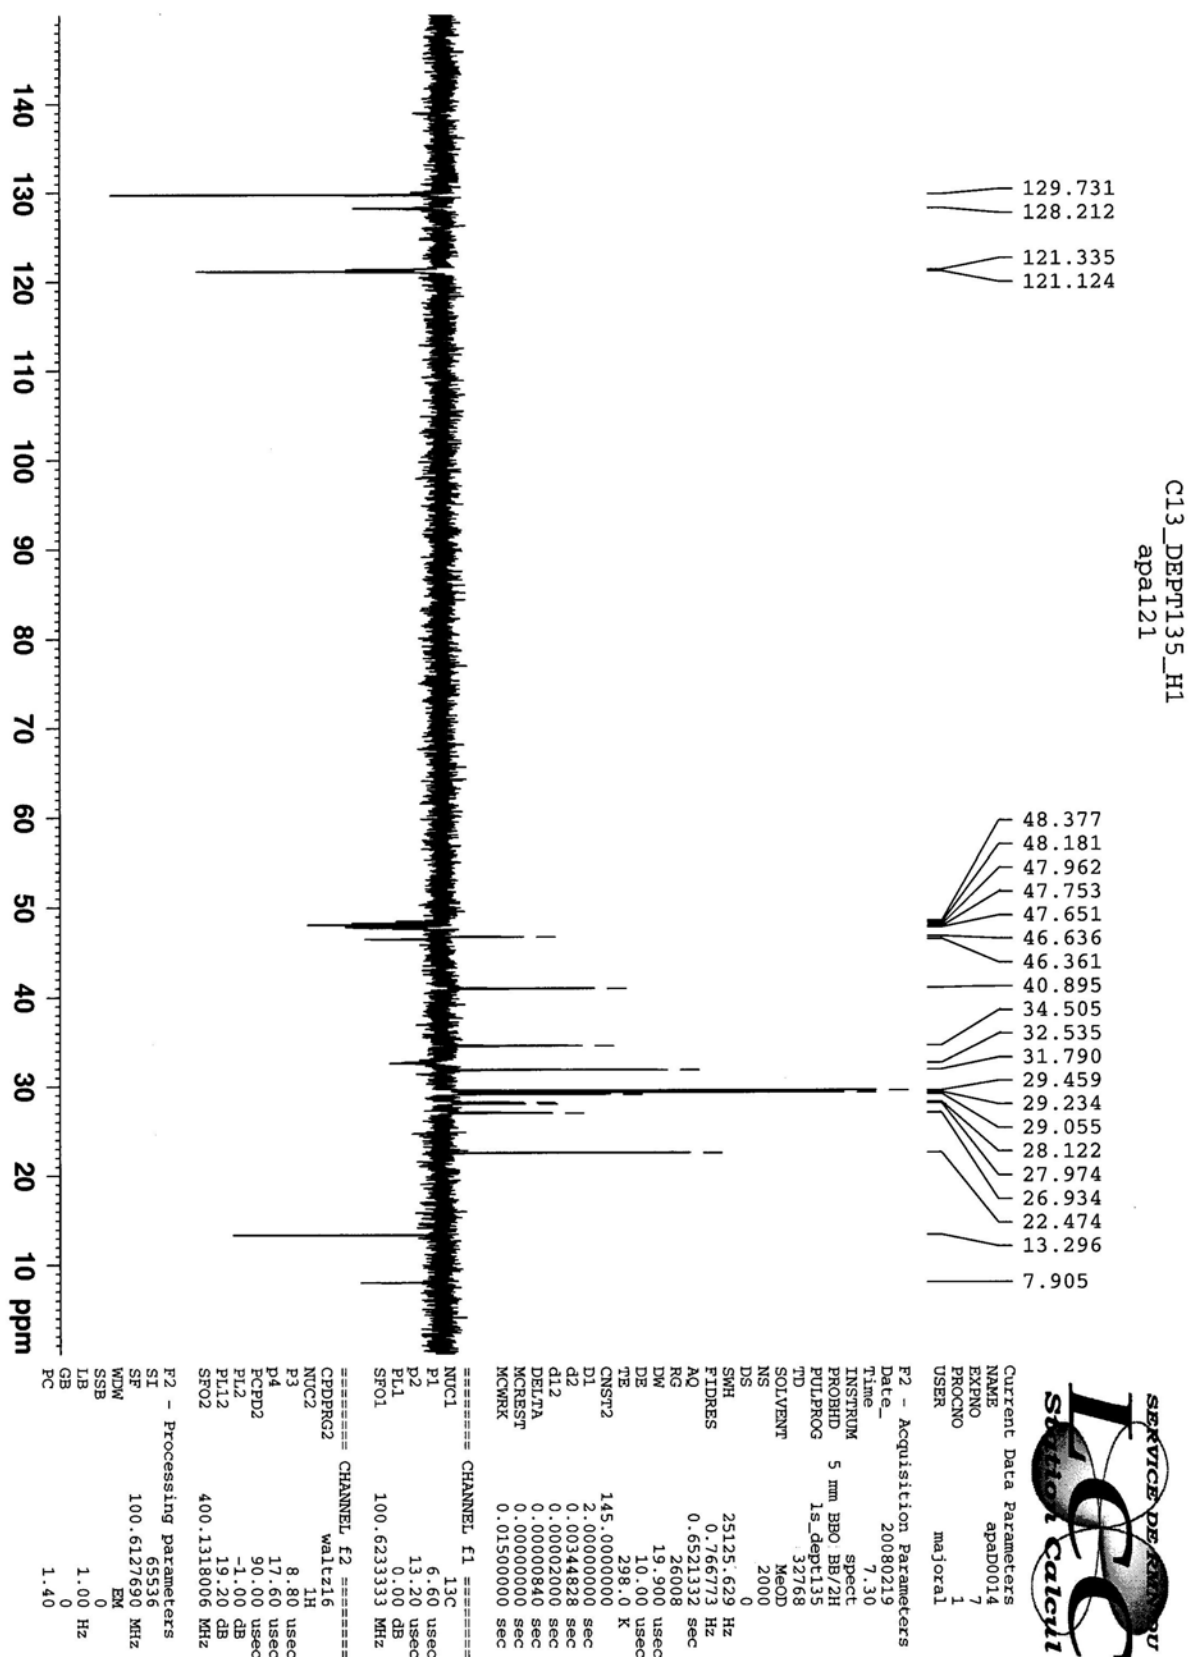

# Compound 7c-Gc'1

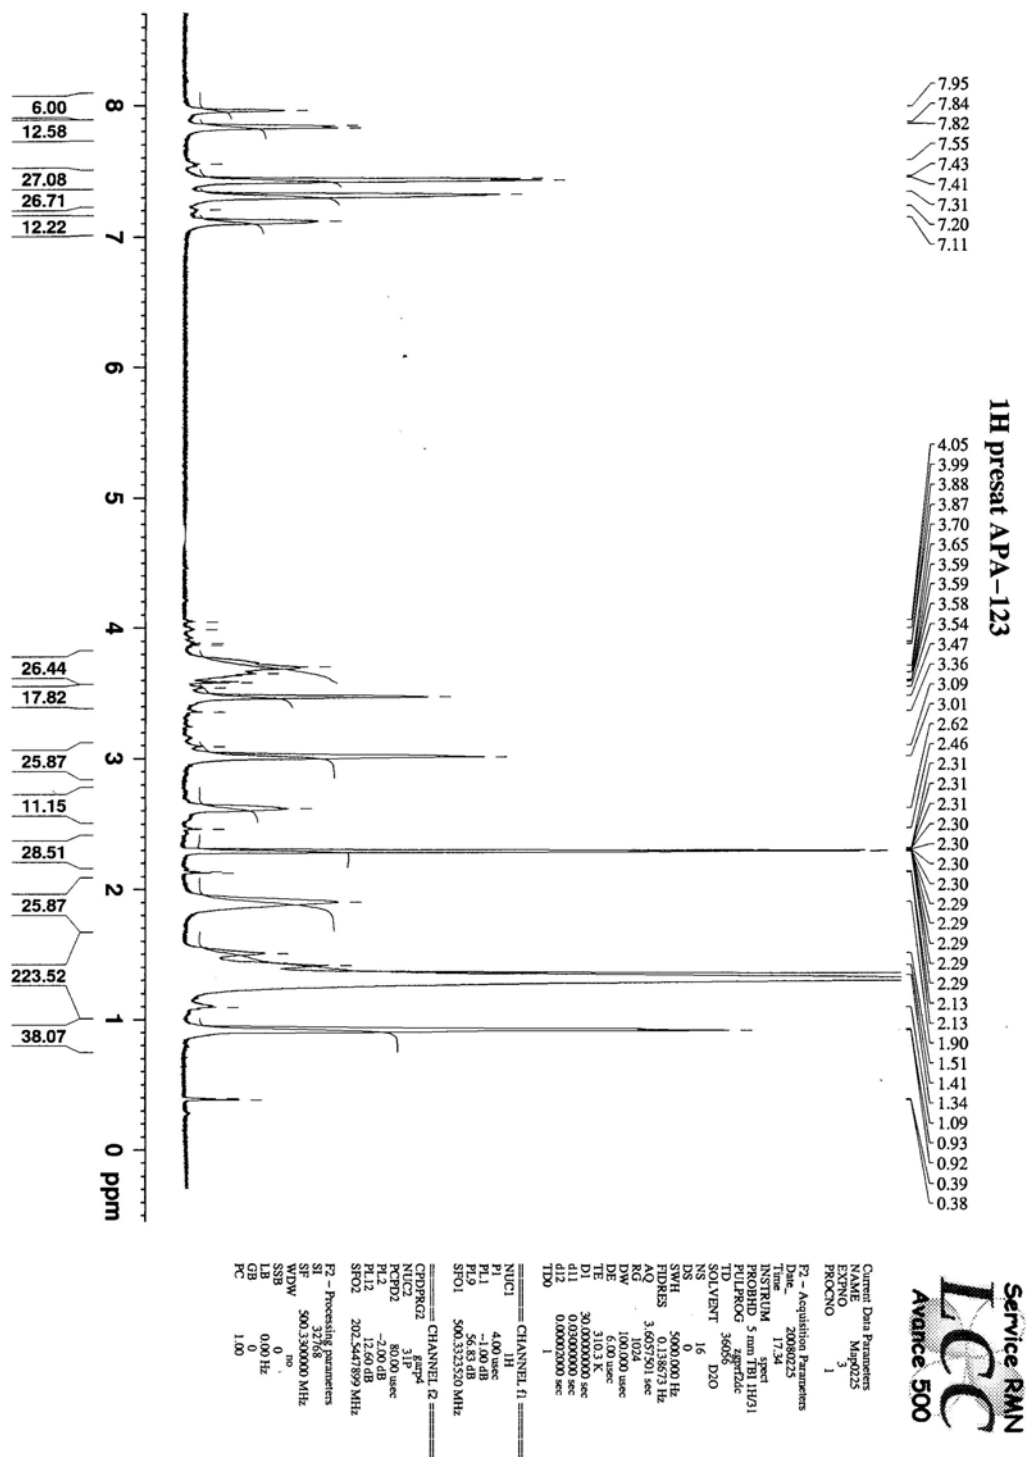

# Compound 7c-Gc'1

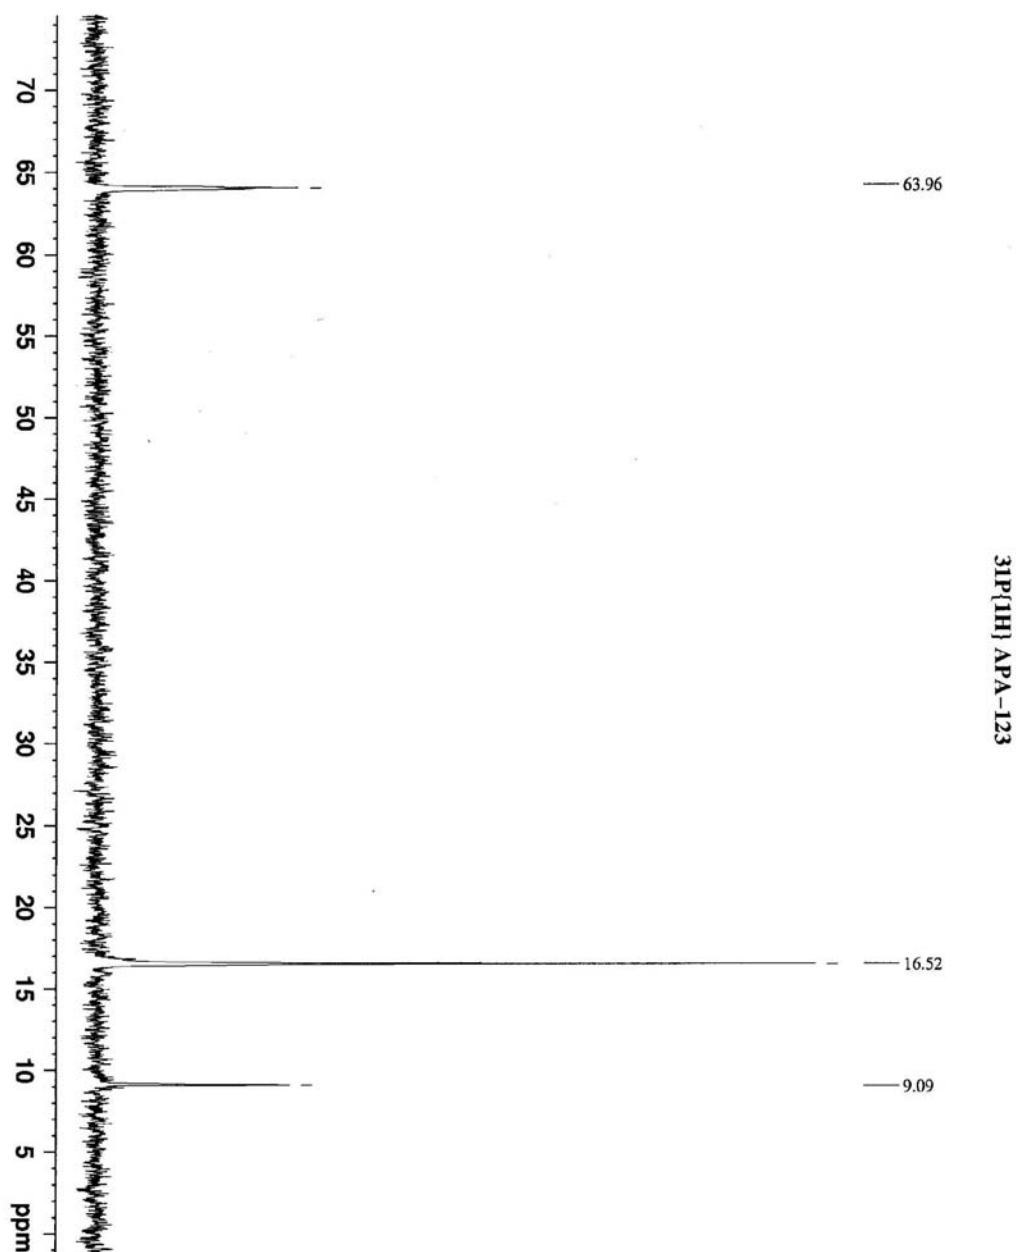

Service RMN  
LCC  
Avance 500

Current Data Parameters  
NAME: Msp225  
EXPNO: 2  
PROCNO: 1

F2 - Acquisition Parameters  
Date\_: 20080225  
Time: 16.57  
INSTRUM: spect  
PROBHD: 5 mm TBI 1H/31  
PULPROG: zgpg30  
TD: 65536  
SOLVENT: D2O  
NS: 417  
DS: 4  
SWH: 40650.406 Hz  
FIDRES: 0.620276 Hz  
AQ: 0.861551 sec  
RG: 327.5  
DWDW: 17.500 usec  
DE: 6.00 usec  
TE: 310.5 K  
D1: 1.0000000 sec  
d11: 0.0500000 sec  
DELTA: 0.8999998 sec  
TDO: 100

===== CHANNEL f1 =====  
NUC1: 1H  
P1: 14.90 usec  
PL1: -2.00 dB  
SFO1: 202.572960 MHz

===== CHANNEL f2 =====  
CPDPRG2: spect16  
NUC2: 1H  
PCPD2: 90.00 usec  
PL2: -1.00 dB  
PL12: 23.00 dB  
PL13: 23.00 dB  
SFO2: 300.330013 MHz

F2 - Processing parameters  
SI: 65536  
SF: 202.572960 MHz  
WDW: EM  
SSB: 0  
LB: 4.00 Hz  
GB: 0  
PC: 1.50

# Compound 7c-Gc'1

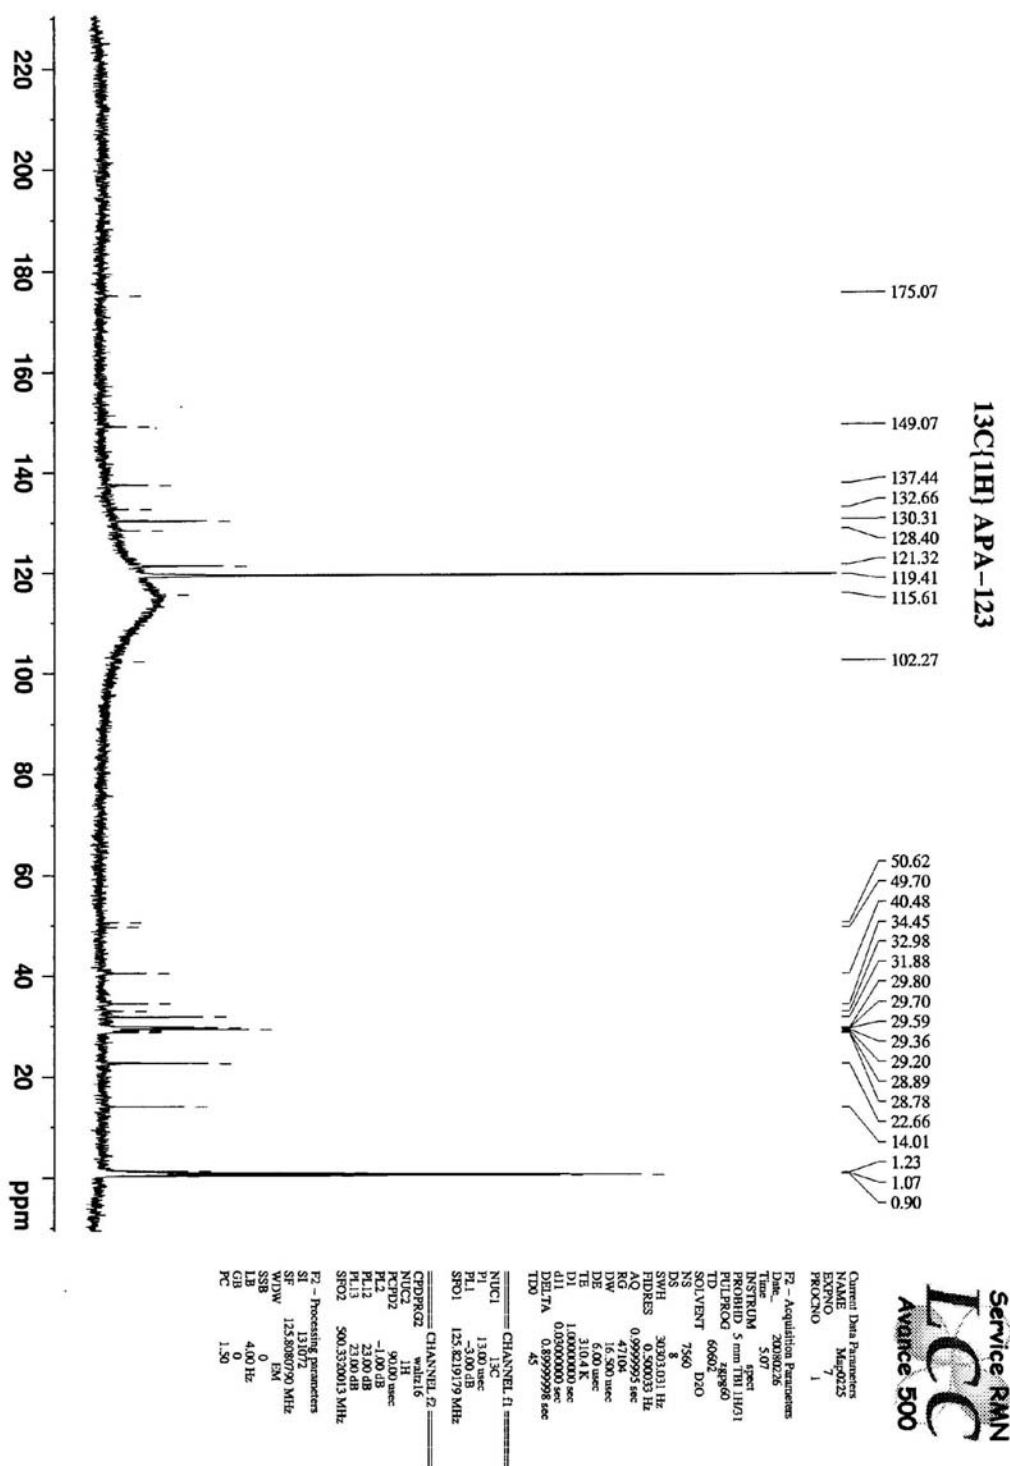

# Compound 7c-Gc'1

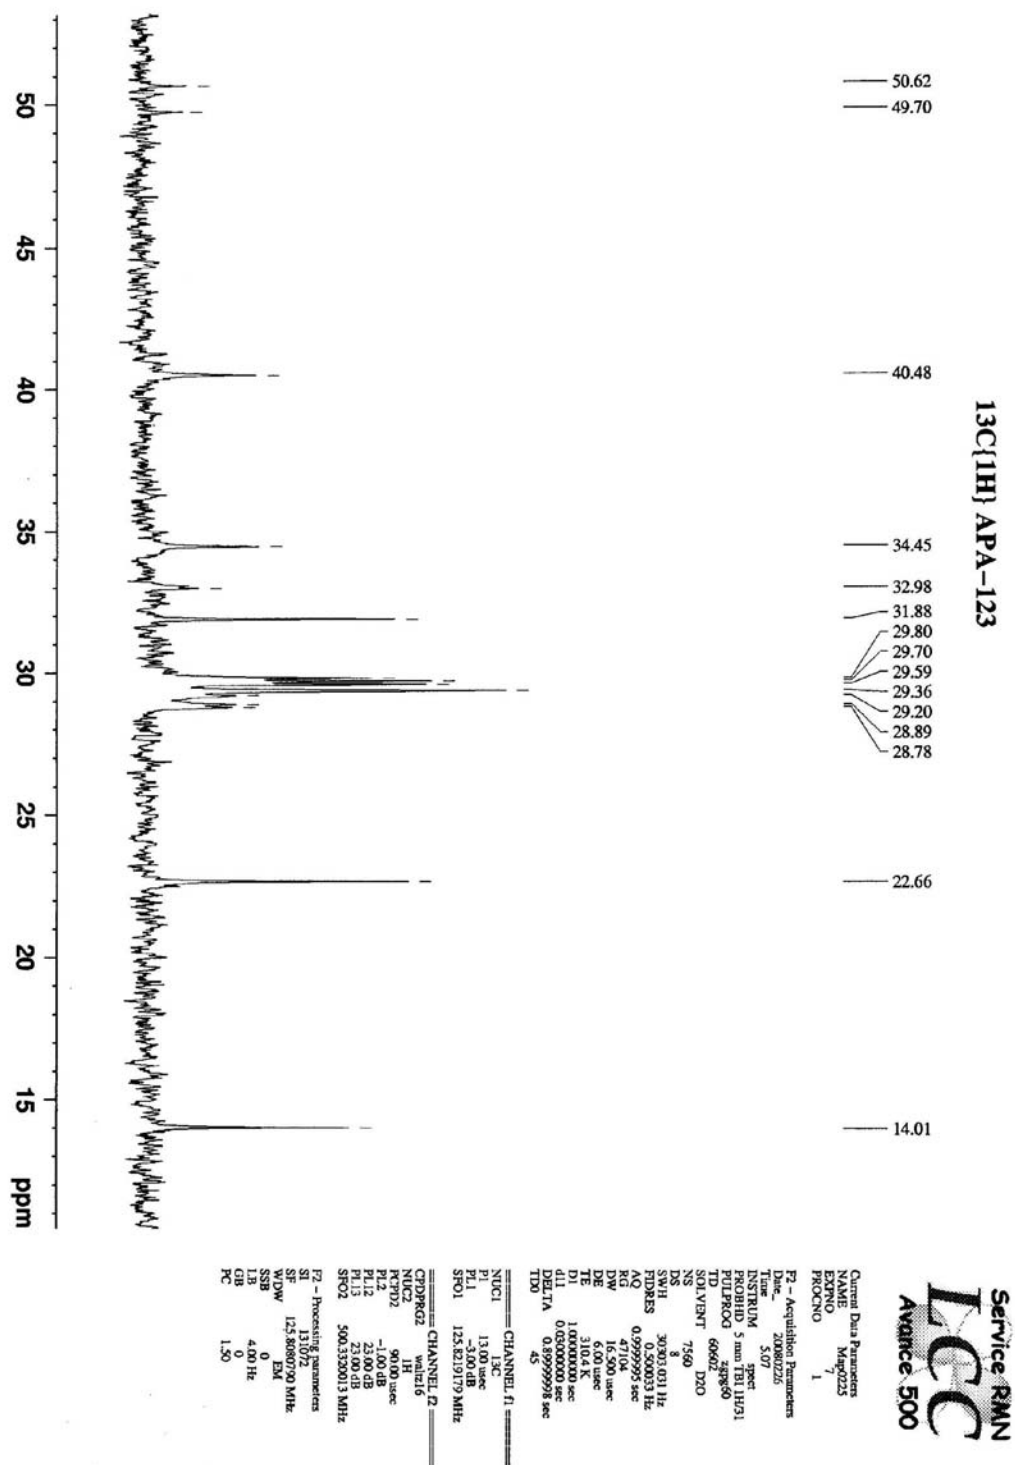

**5c-Gc'<sub>1</sub>: NOESY <sup>1</sup>H-<sup>1</sup>H**

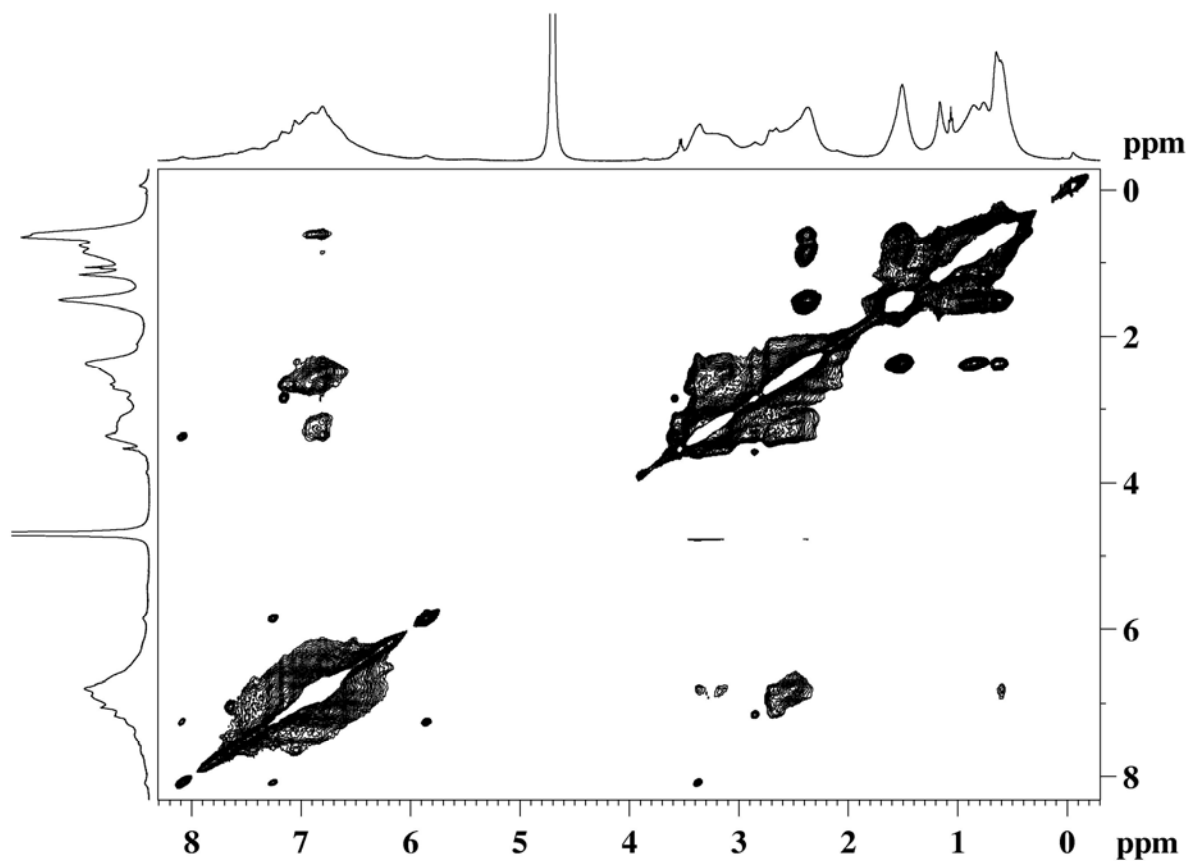

**7c-Gc'<sub>1</sub>: NOESY <sup>1</sup>H-<sup>1</sup>H**

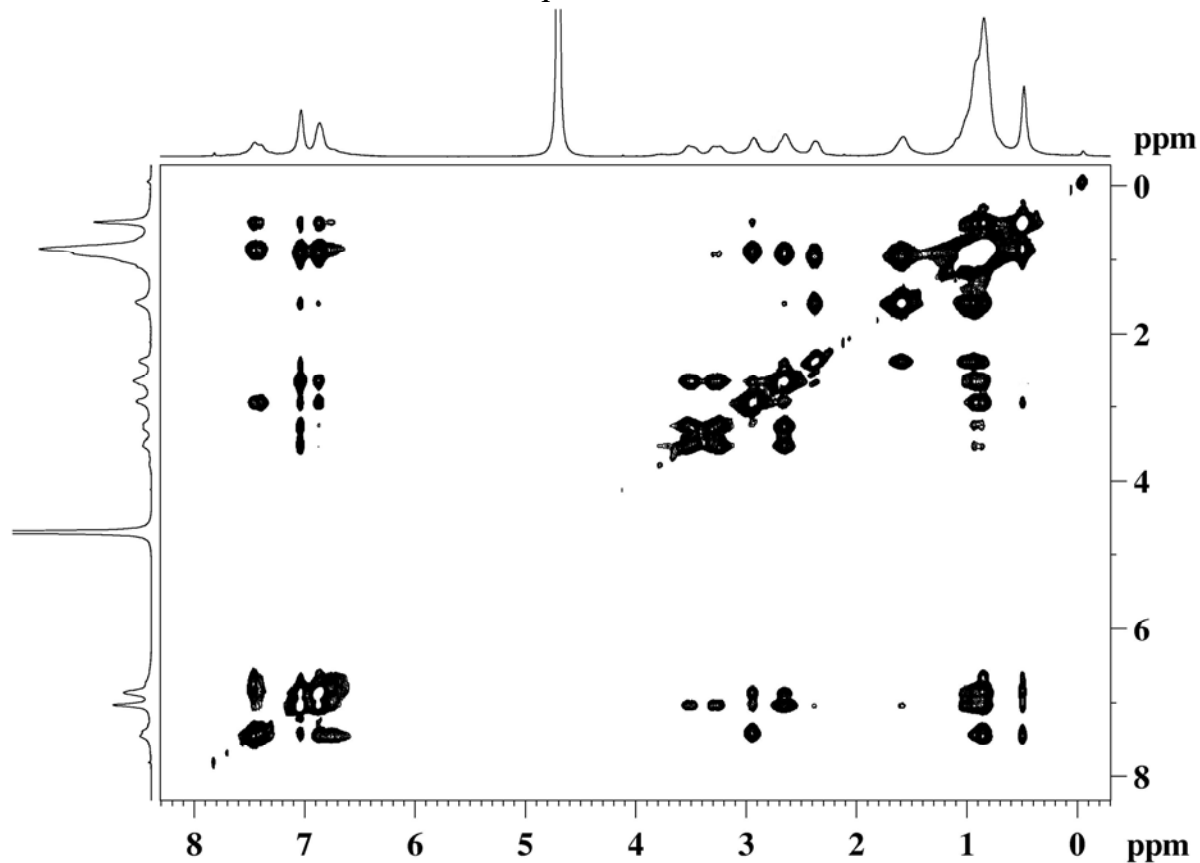

Supplement: b908352a.pdf [file b908352a.pdf]
